# Supplementary material for: Crystallography, in Silico Studies, and In Vitro Antifungal Studies of 2,4,5 Trisubstituted 1,2,3-Triazole Analogues
Source: Antibiotics (Basel). 2020 Jun 20;9(6):350. doi: 10.3390/antibiotics9060350 (PMC7344790; doi:10.3390/antibiotics9060350)
Supplement: Supplementary file 1 [file antibiotics-09-00350-s001.zip › Supplementary material/gkv10.cif]

 
data_shelx
 
_audit_creation_method            'SHELXL-2014/7'
_shelx_SHELXL_version_number      '2014/7'
_chemical_name_systematic         ?
_chemical_name_common             ?
_chemical_melting_point           ?
_chemical_formula_moiety          ?
_chemical_formula_sum
 'C16 H15 N3 O S' 
_chemical_formula_weight          297.37

loop_
 _atom_type_symbol
 _atom_type_description
 _atom_type_scat_dispersion_real
 _atom_type_scat_dispersion_imag
 _atom_type_scat_source
 'C'  'C'   0.0033   0.0016
 'International Tables Vol C Tables 4.2.6.8 and 6.1.1.4'
 'H'  'H'   0.0000   0.0000
 'International Tables Vol C Tables 4.2.6.8 and 6.1.1.4'
 'N'  'N'   0.0061   0.0033
 'International Tables Vol C Tables 4.2.6.8 and 6.1.1.4'
 'O'  'O'   0.0106   0.0060
 'International Tables Vol C Tables 4.2.6.8 and 6.1.1.4'
 'S'  'S'   0.1246   0.1234
 'International Tables Vol C Tables 4.2.6.8 and 6.1.1.4'
 
_space_group_crystal_system       triclinic
_space_group_IT_number            2
_space_group_name_H-M_alt         'P -1'
_space_group_name_Hall            '-P 1'
 
_shelx_space_group_comment
;
The symmetry employed for this shelxl refinement is uniquely defined
by the following loop, which should always be used as a source of
symmetry information in preference to the above space-group names.
They are only intended as comments.
;
 
loop_
 _space_group_symop_operation_xyz
 'x, y, z'
 '-x, -y, -z'
 
_cell_length_a                    7.6676(4)
_cell_length_b                    9.8450(5)
_cell_length_c                    10.8781(6)
_cell_angle_alpha                 94.319(3)
_cell_angle_beta                  109.220(3)
_cell_angle_gamma                 107.332(3)
_cell_volume                      726.36(7)
_cell_formula_units_Z             2
_cell_measurement_temperature     110(2)
_cell_measurement_reflns_used     4585
_cell_measurement_theta_min       2.21
_cell_measurement_theta_max       30.02
 
_exptl_crystal_description        plate
_exptl_crystal_colour             colourless
_exptl_crystal_density_meas       ?
_exptl_crystal_density_method     ?
_exptl_crystal_density_diffrn     1.360          
_exptl_crystal_F_000              312
_exptl_transmission_factor_min    ?
_exptl_transmission_factor_max    ?
_exptl_crystal_size_max           0.300
_exptl_crystal_size_mid           0.180
_exptl_crystal_size_min           0.120
_exptl_absorpt_coefficient_mu     0.225
_shelx_estimated_absorpt_T_min    0.936
_shelx_estimated_absorpt_T_max    0.974
_exptl_absorpt_correction_type    multi-scan
_exptl_absorpt_correction_T_min   0.6694
_exptl_absorpt_correction_T_max   0.7460
_exptl_absorpt_process_details    SADABS
_exptl_absorpt_special_details    ?
_diffrn_ambient_temperature       110(2)
_diffrn_radiation_wavelength      0.71073
_diffrn_radiation_type            MoK\a
_diffrn_source                    ?
_diffrn_measurement_device_type   'Bruker APEX-II CCD'
_diffrn_measurement_method        '\f and \w scans'
_diffrn_detector_area_resol_mean  ?
_diffrn_reflns_number             10812
_diffrn_reflns_av_unetI/netI      0.0388
_diffrn_reflns_av_R_equivalents   0.0337
_diffrn_reflns_limit_h_min        -10
_diffrn_reflns_limit_h_max        10
_diffrn_reflns_limit_k_min        -13
_diffrn_reflns_limit_k_max        12
_diffrn_reflns_limit_l_min        -14
_diffrn_reflns_limit_l_max        14
_diffrn_reflns_theta_min          2.020
_diffrn_reflns_theta_max          28.279
_diffrn_reflns_theta_full         25.242
_diffrn_measured_fraction_theta_max   0.990
_diffrn_measured_fraction_theta_full  0.995
_diffrn_reflns_Laue_measured_fraction_max    0.990
_diffrn_reflns_Laue_measured_fraction_full   0.995
_diffrn_reflns_point_group_measured_fraction_max   0.990
_diffrn_reflns_point_group_measured_fraction_full  0.995
_reflns_number_total              3573
_reflns_number_gt                 3098
_reflns_threshold_expression      'I > 2\s(I)'
_reflns_Friedel_coverage          0.000
_reflns_Friedel_fraction_max      .
_reflns_Friedel_fraction_full     .
 
_reflns_special_details
;
 Reflections were merged by SHELXL according to the crystal
 class for the calculation of statistics and refinement.
 
 _reflns_Friedel_fraction is defined as the number of unique
 Friedel pairs measured divided by the number that would be
 possible theoretically, ignoring centric projections and
 systematic absences.
;
 
_computing_data_collection        'Bruker APEX-II'
_computing_cell_refinement        'Bruker SAINT'
_computing_data_reduction         'Bruker SAINT'
_computing_structure_solution     ?
_computing_structure_refinement   'SHELXL-2014/7 (Sheldrick, 2014)'
_computing_molecular_graphics     'Mercury (Macrae <i>et al.</i>, 2008)'
_computing_publication_material   'WINGX (Farrugia, 2014)'
_refine_special_details           ?
_refine_ls_structure_factor_coef  Fsqd
_refine_ls_matrix_type            full
_refine_ls_weighting_scheme       calc
_refine_ls_weighting_details
'w=1/[\s^2^(Fo^2^)+(0.0773P)^2^+0.1867P] where P=(Fo^2^+2Fc^2^)/3'
_atom_sites_solution_primary      ?
_atom_sites_solution_secondary    ?
_atom_sites_solution_hydrogens    geom
_refine_ls_hydrogen_treatment     constr
_refine_ls_extinction_method      none
_refine_ls_extinction_coef        .
_refine_ls_number_reflns          3573
_refine_ls_number_parameters      192
_refine_ls_number_restraints      0
_refine_ls_R_factor_all           0.0503
_refine_ls_R_factor_gt            0.0442
_refine_ls_wR_factor_ref          0.1301
_refine_ls_wR_factor_gt           0.1249
_refine_ls_goodness_of_fit_ref    1.066
_refine_ls_restrained_S_all       1.066
_refine_ls_shift/su_max           0.001
_refine_ls_shift/su_mean          0.000
 
loop_
 _atom_site_label
 _atom_site_type_symbol
 _atom_site_fract_x
 _atom_site_fract_y
 _atom_site_fract_z
 _atom_site_U_iso_or_equiv
 _atom_site_adp_type
 _atom_site_occupancy
 _atom_site_site_symmetry_order  
 _atom_site_calc_flag
 _atom_site_refinement_flags_posn
 _atom_site_refinement_flags_adp
 _atom_site_refinement_flags_occupancy
 _atom_site_disorder_assembly
 _atom_site_disorder_group
S1 S 0.56923(5) 0.60387(4) 0.66765(4) 0.01888(14) Uani 1 1 d . . . . .
O1 O 0.20568(16) 0.40037(13) 0.67534(12) 0.0225(3) Uani 1 1 d . . . . .
N1 N 0.33297(18) 0.09956(14) 0.59868(13) 0.0167(3) Uani 1 1 d . . . . .
N2 N 0.23680(18) -0.03408(14) 0.60430(13) 0.0172(3) Uani 1 1 d . . . . .
N3 N 0.11506(19) -0.04758(15) 0.66972(14) 0.0185(3) Uani 1 1 d . . . . .
C1 C 0.8397(2) 0.49657(17) 0.68093(16) 0.0180(3) Uani 1 1 d . . . . .
H1 H 0.9609 0.4875 0.6840 0.022 Uiso 1 1 calc R U . . .
C2 C 0.6802(2) 0.38137(16) 0.68565(15) 0.0157(3) Uani 1 1 d . . . . .
H4 H 0.6830 0.2866 0.6939 0.019 Uiso 1 1 calc R U . . .
C3 C 0.5194(2) 0.42311(16) 0.67675(15) 0.0143(3) Uani 1 1 d . . . . .
C4 C 0.3247(2) 0.34055(17) 0.67347(15) 0.0155(3) Uani 1 1 d . . . . .
C5 C 0.2677(2) 0.18126(17) 0.66543(15) 0.0157(3) Uani 1 1 d . . . . .
C6 C 0.1313(2) 0.08959(16) 0.71030(15) 0.0165(3) Uani 1 1 d . . . . .
C7 C 0.0192(2) 0.11896(17) 0.79008(16) 0.0170(3) Uani 1 1 d . . . . .
C8 C 0.0988(2) 0.24054(18) 0.89159(16) 0.0211(3) Uani 1 1 d . . . . .
H12 H 0.2267 0.3070 0.9090 0.025 Uiso 1 1 calc R U . . .
C9 C -0.0069(2) 0.26525(19) 0.96732(17) 0.0228(4) Uani 1 1 d . . . . .
H11 H 0.0496 0.3487 1.0359 0.027 Uiso 1 1 calc R U . . .
C10 C -0.1950(2) 0.16965(18) 0.94457(16) 0.0211(3) Uani 1 1 d . . . . .
C11 C -0.3109(3) 0.1970(2) 1.02739(19) 0.0277(4) Uani 1 1 d . . . . .
H5 H -0.2486 0.1815 1.1181 0.033 Uiso 1 1 calc R U . . .
H6 H -0.4456 0.1248 0.9887 0.033 Uiso 1 1 calc R U . . .
C12 C -0.3247(3) 0.3482(2) 1.03696(18) 0.0268(4) Uani 1 1 d . . . . .
H8 H -0.1926 0.4204 1.0808 0.040 Uiso 1 1 calc R U . . .
H2 H -0.4057 0.3562 1.0886 0.040 Uiso 1 1 calc R U . . .
H7 H -0.3846 0.3653 0.9476 0.040 Uiso 1 1 calc R U . . .
C13 C 0.7989(2) 0.62262(17) 0.67138(16) 0.0199(3) Uani 1 1 d . . . . .
H3 H 0.8891 0.7108 0.6673 0.024 Uiso 1 1 calc R U . . .
C14 C -0.2728(2) 0.04810(18) 0.84425(17) 0.0221(3) Uani 1 1 d . . . . .
H9 H -0.3999 -0.0190 0.8278 0.027 Uiso 1 1 calc R U . . .
C15 C -0.1681(2) 0.02272(17) 0.76726(17) 0.0208(3) Uani 1 1 d . . . . .
H10 H -0.2248 -0.0608 0.6987 0.025 Uiso 1 1 calc R U . . .
C16 C 0.2616(2) -0.16108(17) 0.54378(18) 0.0225(4) Uani 1 1 d . . . . .
H14 H 0.1424 -0.2146 0.4665 0.034 Uiso 1 1 calc R U . . .
H15 H 0.2850 -0.2240 0.6085 0.034 Uiso 1 1 calc R U . . .
H13 H 0.3740 -0.1299 0.5157 0.034 Uiso 1 1 calc R U . . .
 
loop_
 _atom_site_aniso_label
 _atom_site_aniso_U_11
 _atom_site_aniso_U_22
 _atom_site_aniso_U_33
 _atom_site_aniso_U_23
 _atom_site_aniso_U_13
 _atom_site_aniso_U_12
S1 0.0187(2) 0.0115(2) 0.0291(2) 0.00588(16) 0.01099(16) 0.00604(15)
O1 0.0209(6) 0.0170(6) 0.0366(7) 0.0069(5) 0.0162(5) 0.0096(5)
N1 0.0155(6) 0.0113(6) 0.0225(7) 0.0018(5) 0.0070(5) 0.0037(5)
N2 0.0171(6) 0.0103(6) 0.0244(7) 0.0017(5) 0.0090(5) 0.0038(5)
N3 0.0181(6) 0.0132(6) 0.0254(7) 0.0033(5) 0.0102(5) 0.0046(5)
C1 0.0143(7) 0.0176(8) 0.0217(7) 0.0012(6) 0.0069(6) 0.0054(6)
C2 0.0173(7) 0.0116(7) 0.0174(7) 0.0018(6) 0.0063(6) 0.0043(6)
C3 0.0180(7) 0.0095(7) 0.0162(7) 0.0022(5) 0.0070(5) 0.0050(5)
C4 0.0181(7) 0.0138(7) 0.0166(7) 0.0029(6) 0.0083(6) 0.0061(6)
C5 0.0142(7) 0.0140(7) 0.0190(7) 0.0025(6) 0.0065(5) 0.0046(5)
C6 0.0166(7) 0.0112(7) 0.0210(7) 0.0033(6) 0.0069(6) 0.0037(5)
C7 0.0187(7) 0.0134(7) 0.0209(7) 0.0047(6) 0.0098(6) 0.0051(6)
C8 0.0189(7) 0.0191(8) 0.0223(8) 0.0018(6) 0.0084(6) 0.0018(6)
C9 0.0262(8) 0.0196(8) 0.0210(8) 0.0003(6) 0.0113(6) 0.0039(7)
C10 0.0252(8) 0.0195(8) 0.0241(8) 0.0085(6) 0.0147(6) 0.0079(6)
C11 0.0339(9) 0.0266(10) 0.0310(9) 0.0072(7) 0.0228(8) 0.0094(7)
C12 0.0259(9) 0.0309(10) 0.0249(8) 0.0013(7) 0.0111(7) 0.0107(7)
C13 0.0177(7) 0.0146(8) 0.0266(8) 0.0031(6) 0.0101(6) 0.0024(6)
C14 0.0218(8) 0.0156(8) 0.0305(9) 0.0069(7) 0.0145(7) 0.0026(6)
C15 0.0229(8) 0.0128(7) 0.0266(8) 0.0024(6) 0.0121(6) 0.0031(6)
C16 0.0231(8) 0.0129(8) 0.0329(9) -0.0007(7) 0.0112(7) 0.0082(6)
 
_geom_special_details
;
 All esds (except the esd in the dihedral angle between two l.s. planes)
 are estimated using the full covariance matrix.  The cell esds are taken
 into account individually in the estimation of esds in distances, angles
 and torsion angles; correlations between esds in cell parameters are only
 used when they are defined by crystal symmetry.  An approximate (isotropic)
 treatment of cell esds is used for estimating esds involving l.s. planes.
;
 
loop_
 _geom_bond_atom_site_label_1
 _geom_bond_atom_site_label_2
 _geom_bond_distance
 _geom_bond_site_symmetry_2
 _geom_bond_publ_flag
S1 C13 1.7018(16) . ?
S1 C3 1.7231(15) . ?
O1 C4 1.2294(18) . ?
N1 N2 1.3199(18) . ?
N1 C5 1.3477(19) . ?
N2 N3 1.3316(18) . ?
N2 C16 1.4605(19) . ?
N3 C6 1.3445(19) . ?
C1 C13 1.370(2) . ?
C1 C2 1.417(2) . ?
C1 H1 0.9500 . ?
C2 C3 1.388(2) . ?
C2 H4 0.9500 . ?
C3 C4 1.459(2) . ?
C4 C5 1.485(2) . ?
C5 C6 1.409(2) . ?
C6 C7 1.476(2) . ?
C7 C15 1.393(2) . ?
C7 C8 1.395(2) . ?
C8 C9 1.387(2) . ?
C8 H12 0.9500 . ?
C9 C10 1.396(2) . ?
C9 H11 0.9500 . ?
C10 C14 1.389(2) . ?
C10 C11 1.519(2) . ?
C11 C12 1.522(3) . ?
C11 H5 0.9900 . ?
C11 H6 0.9900 . ?
C12 H8 0.9800 . ?
C12 H2 0.9800 . ?
C12 H7 0.9800 . ?
C13 H3 0.9500 . ?
C14 C15 1.392(2) . ?
C14 H9 0.9500 . ?
C15 H10 0.9500 . ?
C16 H14 0.9800 . ?
C16 H15 0.9800 . ?
C16 H13 0.9800 . ?
 
loop_
 _geom_angle_atom_site_label_1
 _geom_angle_atom_site_label_2
 _geom_angle_atom_site_label_3
 _geom_angle
 _geom_angle_site_symmetry_1
 _geom_angle_site_symmetry_3
 _geom_angle_publ_flag
C13 S1 C3 91.77(7) . . ?
N2 N1 C5 103.31(13) . . ?
N1 N2 N3 116.13(13) . . ?
N1 N2 C16 122.69(13) . . ?
N3 N2 C16 121.17(13) . . ?
N2 N3 C6 104.14(13) . . ?
C13 C1 C2 112.23(14) . . ?
C13 C1 H1 123.9 . . ?
C2 C1 H1 123.9 . . ?
C3 C2 C1 112.15(14) . . ?
C3 C2 H4 123.9 . . ?
C1 C2 H4 123.9 . . ?
C2 C3 C4 130.94(14) . . ?
C2 C3 S1 111.19(11) . . ?
C4 C3 S1 117.87(11) . . ?
O1 C4 C3 121.10(14) . . ?
O1 C4 C5 119.28(13) . . ?
C3 C4 C5 119.61(13) . . ?
N1 C5 C6 108.99(14) . . ?
N1 C5 C4 121.78(14) . . ?
C6 C5 C4 128.98(14) . . ?
N3 C6 C5 107.41(13) . . ?
N3 C6 C7 120.04(14) . . ?
C5 C6 C7 132.53(14) . . ?
C15 C7 C8 118.51(15) . . ?
C15 C7 C6 120.18(14) . . ?
C8 C7 C6 121.28(14) . . ?
C9 C8 C7 120.61(15) . . ?
C9 C8 H12 119.7 . . ?
C7 C8 H12 119.7 . . ?
C8 C9 C10 121.17(15) . . ?
C8 C9 H11 119.4 . . ?
C10 C9 H11 119.4 . . ?
C14 C10 C9 117.96(15) . . ?
C14 C10 C11 120.90(15) . . ?
C9 C10 C11 121.14(16) . . ?
C10 C11 C12 114.25(15) . . ?
C10 C11 H5 108.7 . . ?
C12 C11 H5 108.7 . . ?
C10 C11 H6 108.7 . . ?
C12 C11 H6 108.7 . . ?
H5 C11 H6 107.6 . . ?
C11 C12 H8 109.5 . . ?
C11 C12 H2 109.5 . . ?
H8 C12 H2 109.5 . . ?
C11 C12 H7 109.5 . . ?
H8 C12 H7 109.5 . . ?
H2 C12 H7 109.5 . . ?
C1 C13 S1 112.63(12) . . ?
C1 C13 H3 123.7 . . ?
S1 C13 H3 123.7 . . ?
C10 C14 C15 121.28(15) . . ?
C10 C14 H9 119.4 . . ?
C15 C14 H9 119.4 . . ?
C14 C15 C7 120.45(15) . . ?
C14 C15 H10 119.8 . . ?
C7 C15 H10 119.8 . . ?
N2 C16 H14 109.5 . . ?
N2 C16 H15 109.5 . . ?
H14 C16 H15 109.5 . . ?
N2 C16 H13 109.5 . . ?
H14 C16 H13 109.5 . . ?
H15 C16 H13 109.5 . . ?
 
loop_
 _geom_torsion_atom_site_label_1
 _geom_torsion_atom_site_label_2
 _geom_torsion_atom_site_label_3
 _geom_torsion_atom_site_label_4
 _geom_torsion
 _geom_torsion_site_symmetry_1
 _geom_torsion_site_symmetry_2
 _geom_torsion_site_symmetry_3
 _geom_torsion_site_symmetry_4
 _geom_torsion_publ_flag
C5 N1 N2 N3 -0.50(17) . . . . ?
C5 N1 N2 C16 179.95(13) . . . . ?
N1 N2 N3 C6 0.43(17) . . . . ?
C16 N2 N3 C6 179.98(13) . . . . ?
C13 C1 C2 C3 1.22(19) . . . . ?
C1 C2 C3 C4 177.90(15) . . . . ?
C1 C2 C3 S1 -1.76(17) . . . . ?
C13 S1 C3 C2 1.43(12) . . . . ?
C13 S1 C3 C4 -178.28(13) . . . . ?
C2 C3 C4 O1 174.41(15) . . . . ?
S1 C3 C4 O1 -6.0(2) . . . . ?
C2 C3 C4 C5 -6.6(2) . . . . ?
S1 C3 C4 C5 172.99(11) . . . . ?
N2 N1 C5 C6 0.36(16) . . . . ?
N2 N1 C5 C4 -174.36(13) . . . . ?
O1 C4 C5 N1 145.59(15) . . . . ?
C3 C4 C5 N1 -33.4(2) . . . . ?
O1 C4 C5 C6 -28.0(2) . . . . ?
C3 C4 C5 C6 153.05(15) . . . . ?
N2 N3 C6 C5 -0.16(16) . . . . ?
N2 N3 C6 C7 -178.67(13) . . . . ?
N1 C5 C6 N3 -0.13(17) . . . . ?
C4 C5 C6 N3 174.10(14) . . . . ?
N1 C5 C6 C7 178.12(15) . . . . ?
C4 C5 C6 C7 -7.7(3) . . . . ?
N3 C6 C7 C15 -34.8(2) . . . . ?
C5 C6 C7 C15 147.12(17) . . . . ?
N3 C6 C7 C8 143.53(16) . . . . ?
C5 C6 C7 C8 -34.5(3) . . . . ?
C15 C7 C8 C9 -0.4(2) . . . . ?
C6 C7 C8 C9 -178.79(15) . . . . ?
C7 C8 C9 C10 0.1(3) . . . . ?
C8 C9 C10 C14 0.5(3) . . . . ?
C8 C9 C10 C11 -179.88(16) . . . . ?
C14 C10 C11 C12 -129.22(18) . . . . ?
C9 C10 C11 C12 51.2(2) . . . . ?
C2 C1 C13 S1 -0.13(18) . . . . ?
C3 S1 C13 C1 -0.74(13) . . . . ?
C9 C10 C14 C15 -0.8(3) . . . . ?
C11 C10 C14 C15 179.56(16) . . . . ?
C10 C14 C15 C7 0.5(3) . . . . ?
C8 C7 C15 C14 0.1(2) . . . . ?
C6 C7 C15 C14 178.51(15) . . . . ?
 
_refine_diff_density_max    0.708
_refine_diff_density_min   -0.383
_refine_diff_density_rms    0.071

_shelx_res_file
;

    shelx.res created by SHELXL-2014/7


TITL TRYFINAL in P-1
CELL 0.71073 7.6676 9.8450 10.8781 94.319 109.220 107.332
ZERR 2.00 0.0004 0.0005 0.0006 0.003 0.003 0.003
LATT 1
SFAC C H N O S
UNIT 32 30 6 2 2
TEMP -163
SIZE 0.30 0.18 0.12
ACTA
L.S. 12
FMAP 2
PLAN 5
HTAB
BOND $H
CONF
WGHT    0.077300    0.186700
FVAR       0.51838
S1    5    0.569232    0.603875    0.667648    11.00000    0.01874    0.01145 =
         0.02913    0.00588    0.01099    0.00604
O1    4    0.205683    0.400375    0.675345    11.00000    0.02087    0.01698 =
         0.03657    0.00695    0.01617    0.00958
N1    3    0.332968    0.099562    0.598681    11.00000    0.01550    0.01128 =
         0.02255    0.00180    0.00703    0.00373
N2    3    0.236798   -0.034079    0.604296    11.00000    0.01707    0.01033 =
         0.02440    0.00166    0.00898    0.00378
N3    3    0.115061   -0.047576    0.669721    11.00000    0.01806    0.01322 =
         0.02541    0.00326    0.01022    0.00456
C1    1    0.839668    0.496575    0.680932    11.00000    0.01429    0.01760 =
         0.02169    0.00118    0.00688    0.00543
AFIX  43
H1    2    0.960877    0.487455    0.684030    11.00000   -1.20000
AFIX   0
C2    1    0.680180    0.381372    0.685655    11.00000    0.01730    0.01158 =
         0.01736    0.00180    0.00630    0.00428
AFIX  43
H4    2    0.682962    0.286595    0.693950    11.00000   -1.20000
AFIX   0
C3    1    0.519406    0.423112    0.676752    11.00000    0.01799    0.00951 =
         0.01623    0.00217    0.00702    0.00501
C4    1    0.324740    0.340553    0.673471    11.00000    0.01814    0.01378 =
         0.01663    0.00287    0.00831    0.00608
C5    1    0.267661    0.181259    0.665429    11.00000    0.01419    0.01397 =
         0.01898    0.00253    0.00645    0.00460
C6    1    0.131291    0.089588    0.710296    11.00000    0.01662    0.01124 =
         0.02099    0.00334    0.00687    0.00374
C7    1    0.019160    0.118961    0.790082    11.00000    0.01870    0.01342 =
         0.02087    0.00471    0.00984    0.00509
C8    1    0.098818    0.240541    0.891587    11.00000    0.01885    0.01907 =
         0.02230    0.00184    0.00836    0.00179
AFIX  43
H12   2    0.226705    0.307019    0.908980    11.00000   -1.20000
AFIX   0
C9    1   -0.006931    0.265253    0.967321    11.00000    0.02621    0.01963 =
         0.02097    0.00027    0.01128    0.00387
AFIX  43
H11   2    0.049637    0.348735    1.035913    11.00000   -1.20000
AFIX   0
C10   1   -0.195012    0.169655    0.944571    11.00000    0.02515    0.01950 =
         0.02412    0.00850    0.01469    0.00788
C11   1   -0.310902    0.196966    1.027391    11.00000    0.03390    0.02658 =
         0.03099    0.00723    0.02280    0.00939
AFIX  23
H5    2   -0.248626    0.181471    1.118062    11.00000   -1.20000
H6    2   -0.445603    0.124817    0.988677    11.00000   -1.20000
AFIX   0
C12   1   -0.324682    0.348167    1.036958    11.00000    0.02588    0.03094 =
         0.02493    0.00126    0.01110    0.01072
AFIX 137
H8    2   -0.192602    0.420384    1.080751    11.00000   -1.50000
H2    2   -0.405672    0.356211    1.088638    11.00000   -1.50000
H7    2   -0.384648    0.365284    0.947647    11.00000   -1.50000
AFIX   0
C13   1    0.798942    0.622617    0.671383    11.00000    0.01768    0.01464 =
         0.02657    0.00306    0.01013    0.00236
AFIX  43
H3    2    0.889087    0.710841    0.667293    11.00000   -1.20000
AFIX   0
C14   1   -0.272798    0.048099    0.844254    11.00000    0.02179    0.01563 =
         0.03045    0.00695    0.01453    0.00256
AFIX  43
H9    2   -0.399905   -0.019048    0.827836    11.00000   -1.20000
AFIX   0
C15   1   -0.168122    0.022717    0.767263    11.00000    0.02294    0.01278 =
         0.02658    0.00236    0.01209    0.00313
AFIX  43
H10   2   -0.224801   -0.060802    0.698704    11.00000   -1.20000
AFIX   0
C16   1    0.261610   -0.161078    0.543776    11.00000    0.02305    0.01294 =
         0.03293   -0.00067    0.01123    0.00823
AFIX 137
H14   2    0.142399   -0.214599    0.466483    11.00000   -1.50000
H15   2    0.285033   -0.223973    0.608523    11.00000   -1.50000
H13   2    0.374047   -0.129879    0.515714    11.00000   -1.50000
AFIX   0
HKLF 4 1 1 0 0 0 1 0 0 0 1

REM  TRYFINAL in P-1
REM R1 =  0.0442 for    3098 Fo > 4sig(Fo)  and  0.0503 for all    3573 data
REM    192 parameters refined using      0 restraints

END

WGHT      0.0775      0.1866

REM Instructions for potential hydrogen bonds
EQIV $1 x+1, y, z
HTAB C1 O1_$1
HTAB C2 N1
EQIV $2 x+1, y+1, z
HTAB C13 N3_$2
EQIV $3 -x, -y, -z+1
HTAB C16 O1_$3

REM Highest difference peak  0.708,  deepest hole -0.383,  1-sigma level  0.071
Q1    1   0.6810  0.6085  0.6598  11.00000  0.05    0.71
Q2    1   0.4669  0.5979  0.5843  11.00000  0.05    0.47
Q3    1   0.6544  0.6221  0.7568  11.00000  0.05    0.45
Q4    1   0.5799  0.3877  0.6738  11.00000  0.05    0.41
Q5    1   0.4465  0.5997  0.6618  11.00000  0.05    0.40
;
_shelx_res_checksum   53798

_shelx_hkl_file
;
  -1   0   0    3.13    0.31
  -1   0   0    2.68    0.29
   1   0   0    3.41    0.31
  -2   0   0  737.58   22.75
  -2   0   0  762.82   22.59
   2   0   0  741.24   22.58
   2   0   0  746.99   22.76
  -3   0   0    4.67    0.54
  -3   0   0    5.11    0.67
  -3   0   0    5.51    0.69
   3   0   0    5.54    0.60
   3   0   0    5.01    0.53
   3   0   0    6.00    0.72
   3   0   0    4.24    0.55
  -4   0   0   16.32    1.18
  -4   0   0   18.83    1.25
  -4   0   0   17.33    1.03
   4   0   0   16.83    1.21
   4   0   0   16.64    1.04
   4   0   0   16.66    1.00
   4   0   0   18.11    1.19
  -5   0   0    0.35    0.27
  -5   0   0    0.29    0.29
   5   0   0    0.09    0.30
   5   0   0    0.33    0.25
   5   0   0    0.33    0.25
  -6   0   0    2.95    0.73
   6   0   0    3.60    0.70
   6   0   0    5.51    0.97
   7   0   0   39.48    2.30
   7   0   0   39.86    2.49
   8   0   0   17.77    1.91
   8   0   0   16.26    1.98
  -9   0   0   36.46    3.20
  -9   0   0   36.23    2.70
   9   0   0   31.22    2.63
   9  -1   0   13.68    1.92
   9  -1   0   12.39    1.70
  -9   1   0   14.05    2.32
   8  -1   0   71.67    3.57
   8  -1   0   67.09    3.67
   7  -1   0    1.14    0.58
   7  -1   0    0.87    0.48
   6  -1   0    2.44    0.57
   6  -1   0    1.40    0.59
  -6   1   0    1.47    0.53
   5  -1   0    9.35    1.33
   5  -1   0    8.47    0.68
   5  -1   0    7.90    0.99
   5  -1   0   10.28    1.08
  -5   1   0   11.03    1.43
  -5   1   0    9.48    0.72
  -5   1   0    8.06    1.03
   4  -1   0   23.03    1.38
   4  -1   0   22.38    1.28
   4  -1   0   25.24    1.14
   4  -1   0   23.28    1.38
  -4   1   0   24.36    1.39
  -4   1   0   23.47    1.12
  -4   1   0   23.94    1.40
   3  -1   0  254.77    7.94
   3  -1   0  250.42    8.26
   3  -1   0  261.03    8.21
   3  -1   0  245.00    8.23
  -3   1   0  265.56    8.30
  -3   1   0  260.49    8.04
  -3   1   0  262.21    8.28
  -3   1   0  243.82    7.92
   2  -1   0   79.53    2.80
   2  -1   0   81.42    2.80
  -2   1   0   79.57    2.81
  -2   1   0   80.62    2.78
   1  -1   0  546.51   16.58
   0  -1   0   21.74    0.89
   0  -1   0   22.97    0.89
   0   1   0   23.11    0.89
   0   1   0   22.14    0.90
  -1  -1   0  468.50   14.61
  -1  -1   0  486.45   14.64
   1   1   0  469.71   14.54
   1   1   0  482.54   14.62
  -2  -1   0  324.13   10.55
  -2  -1   0  344.21   10.58
   2   1   0  334.90   10.57
   2   1   0  332.67   10.53
   2   1   0  322.29   10.39
  -3  -1   0   19.88    1.25
  -3  -1   0   21.78    1.30
  -3  -1   0   22.11    1.17
   3   1   0   19.11    1.10
   3   1   0   19.30    1.20
   3   1   0   19.62    1.25
   3   1   0   21.04    1.21
  -4  -1   0   35.19    1.75
  -4  -1   0   35.51    1.95
  -4  -1   0   36.38    2.01
   4   1   0   34.23    1.80
   4   1   0   35.11    1.68
   4   1   0   35.00    1.91
   4   1   0   31.50    1.89
  -5  -1   0   77.05    3.55
  -5  -1   0   77.41    3.19
   5   1   0   73.48    3.29
   5   1   0   73.44    3.10
   5   1   0   73.78    3.13
  -6  -1   0    1.46    0.52
   6   1   0    1.63    0.49
   6   1   0    1.52    0.51
   6   1   0    1.36    0.57
  -7  -1   0    1.04    0.56
   7   1   0    0.78    0.58
   7   1   0    0.62    0.45
  -8  -1   0   55.66    3.82
  -8  -1   0   58.96    3.41
   8   1   0   56.77    3.38
   9  -2   0   24.92    2.57
   9  -2   0   27.71    2.20
   8  -2   0    0.35    0.45
   8  -2   0    0.48    0.49
   7  -2   0   11.50    1.38
   7  -2   0    8.92    1.27
   6  -2   0    4.05    0.75
   6  -2   0    4.29    0.82
  -6   2   0    4.67    0.88
   5  -2   0   39.20    2.07
   5  -2   0   39.26    1.99
   5  -2   0   39.64    2.11
  -5   2   0   39.37    2.05
  -5   2   0   40.46    1.83
  -5   2   0   38.50    2.04
   4  -2   0  268.99    8.95
   4  -2   0  261.06    8.90
   4  -2   0  273.20    8.87
  -4   2   0  267.17    8.91
  -4   2   0  279.66    8.80
   3  -2   0  203.39    6.87
   3  -2   0  219.66    6.86
   3  -2   0  206.21    6.81
  -3   2   0  208.23    6.84
  -3   2   0  200.84    6.78
   2  -2   0   73.70    2.57
   2  -2   0   76.82    2.74
  -2   2   0   68.21    2.54
  -2   2   0   64.57    2.63
   1  -2   0  558.93   15.61
   1  -2   0  504.93   15.42
  -1   2   0  488.16   15.42
  -1   2   0  465.73   15.51
   0  -2   0  157.38    5.34
   0  -2   0  158.97    5.38
   0   2   0  167.54    5.39
   0   2   0  164.78    5.36
   0   2   0  171.18    5.25
  -1  -2   0  238.02    7.48
  -1  -2   0  244.40    7.78
   1   2   0  232.54    7.48
   1   2   0  225.26    7.61
   1   2   0  254.16    7.77
  -2  -2   0    0.78    0.30
  -2  -2   0    0.93    0.33
   2   2   0    0.51    0.23
   2   2   0    1.05    0.32
  -3  -2   0  259.10    8.64
  -3  -2   0  266.42    8.97
  -3  -2   0  273.97    8.73
  -3  -2   0  268.49    8.97
   3   2   0  265.62    8.44
   3   2   0  252.93    8.85
   3   2   0  259.02    8.67
   3   2   0  262.06    8.66
  -4  -2   0  327.61   10.52
  -4  -2   0  319.49   10.84
  -4  -2   0  318.21   10.51
   4   2   0  303.67   10.69
   4   2   0  326.91   10.28
   4   2   0  319.48   10.51
   4   2   0  308.46   10.45
  -5  -2   0  106.91    4.38
  -5  -2   0  110.06    4.76
  -5  -2   0  102.35    4.28
   5   2   0  116.04    4.46
   5   2   0  105.09    4.28
   5   2   0  103.86    4.66
   5   2   0  104.29    4.10
  -6  -2   0    0.82    0.47
  -6  -2   0    2.84    0.79
   6   2   0    1.82    0.62
   6   2   0    0.79    0.45
   6   2   0    1.06    0.61
  -7  -2   0    1.39    0.69
  -7  -2   0    1.37    0.77
   7   2   0   -0.22    0.48
   8   2   0   -0.07    0.67
   9  -3   0    1.87    0.71
   9  -3   0    1.93    0.90
   8  -3   0    2.79    0.78
   8  -3   0    2.91    0.89
   7  -3   0   16.40    1.68
   7  -3   0   20.28    1.69
  -7   3   0   18.54    1.23
   6  -3   0    9.31    1.19
   6  -3   0   10.59    1.28
  -6   3   0    9.73    1.21
  -6   3   0    9.25    0.89
   5  -3   0    8.08    1.01
   5  -3   0    5.84    0.83
   5  -3   0    9.72    1.12
  -5   3   0    7.43    0.97
  -5   3   0    7.55    0.93
   4  -3   0  238.65    7.93
   4  -3   0  236.49    8.00
   4  -3   0  242.67    7.93
  -4   3   0  234.10    7.99
  -4   3   0  229.69    7.90
   3  -3   0   36.29    1.70
   3  -3   0   34.48    1.63
   3  -3   0   37.71    1.69
  -3   3   0   35.18    1.66
  -3   3   0   35.07    1.79
   2  -3   0   93.19    3.53
   2  -3   0   90.00    3.28
  -2   3   0   88.55    3.29
  -2   3   0   90.52    3.48
   1  -3   0    1.81    0.42
   1  -3   0    1.89    0.46
  -1   3   0    1.67    0.47
  -1   3   0    1.61    0.39
  -1   3   0    1.66    0.36
  -1   3   0    1.89    0.31
   0  -3   0  117.87    4.36
   0  -3   0  124.04    4.42
   0   3   0  125.25    4.41
   0   3   0  124.93    4.38
   0   3   0  131.30    4.24
  -1  -3   0  122.96    4.30
  -1  -3   0  126.69    4.59
   1   3   0  113.71    4.34
   1   3   0  128.42    4.33
   1   3   0  133.76    4.60
  -2  -3   0   36.11    1.80
  -2  -3   0   40.95    2.05
  -2  -3   0   37.44    1.55
  -2  -3   0   38.59    2.03
   2   3   0   40.43    1.88
   2   3   0   38.38    1.61
   2   3   0   38.06    1.97
   2   3   0   38.85    1.79
  -3  -3   0   24.52    1.44
  -3  -3   0   23.85    1.65
  -3  -3   0   23.43    1.48
   3   3   0   24.95    1.49
   3   3   0   23.09    1.56
   3   3   0   24.08    1.24
   3   3   0   25.06    1.45
  -4  -3   0   27.44    1.68
  -4  -3   0   25.24    1.84
  -4  -3   0   26.86    1.68
   4   3   0   25.08    1.41
   4   3   0   27.92    1.68
   4   3   0   23.57    1.74
   4   3   0   27.79    1.68
  -5  -3   0    0.56    0.38
  -5  -3   0   -0.06    0.35
   5   3   0    0.12    0.39
   5   3   0    0.61    0.38
  -6  -3   0    8.73    1.33
  -6  -3   0    9.50    1.32
   6   3   0    7.20    1.16
   6   3   0    8.32    1.23
  -7  -3   0   16.82    2.04
   7   3   0   20.73    2.22
   9  -4   0   21.44    2.28
   9  -4   0   20.15    2.35
   8  -4   0   30.83    2.18
   8  -4   0   28.57    2.26
   7  -4   0   19.39    1.66
   7  -4   0   18.19    1.82
  -7   4   0   17.19    1.39
   6  -4   0    0.26    0.31
   6  -4   0    0.42    0.37
  -6   4   0    0.28    0.27
  -6   4   0   -0.11    0.27
   5  -4   0  119.50    4.66
   5  -4   0  119.66    4.64
   5  -4   0  126.58    4.81
  -5   4   0  117.25    4.78
  -5   4   0  124.75    4.71
   4  -4   0   16.21    1.18
   4  -4   0   17.58    1.17
   4  -4   0   16.51    1.13
  -4   4   0   18.73    1.22
  -4   4   0   17.48    1.30
   3  -4   0   56.03    2.48
   3  -4   0   57.24    2.46
   3  -4   0   60.01    2.41
  -3   4   0   58.87    2.70
  -3   4   0   57.76    2.49
   2  -4   0   -0.03    0.18
   2  -4   0   -0.27    0.14
   2  -4   0    0.05    0.25
   2  -4   0    0.03    0.18
  -2   4   0   -0.10    0.17
  -2   4   0   -0.11    0.11
  -2   4   0    0.06    0.22
   1  -4   0  303.91   10.06
   1  -4   0  321.95    9.87
   1  -4   0  291.21   10.15
  -1   4   0  303.74   10.04
  -1   4   0  319.47   10.22
  -1   4   0  310.74    9.72
   0  -4   0  531.62   17.61
   0  -4   0  546.42   17.38
   0  -4   0  566.20   17.72
   0   4   0  559.71   17.68
   0   4   0  586.64   17.45
   0   4   0  575.92   17.66
  -1  -4   0  425.55   14.08
  -1  -4   0  441.99   14.01
  -1  -4   0  463.81   14.49
   1   4   0  434.32   14.13
   1   4   0  446.60   14.12
   1   4   0  462.98   14.43
  -2  -4   0   11.71    0.82
  -2  -4   0   11.57    1.37
  -2  -4   0   11.12    0.93
   2   4   0   13.71    1.06
   2   4   0   11.40    0.93
   2   4   0   12.15    1.10
   2   4   0   11.16    0.84
  -3  -4   0    8.79    1.27
  -3  -4   0    9.64    1.19
  -3  -4   0    8.21    1.02
   3   4   0    9.56    0.77
   3   4   0    8.88    1.06
   3   4   0    9.82    1.31
   3   4   0   10.58    1.15
  -4  -4   0   31.07    1.95
  -4  -4   0   30.40    1.89
   4   4   0   27.54    1.85
   4   4   0   28.21    1.84
  -5  -4   0    5.89    1.09
  -5  -4   0    6.43    1.14
   5   4   0    5.57    1.02
   5   4   0    5.47    1.09
  -6  -4   0    0.38    0.54
  -6  -4   0    0.68    0.61
   6   4   0    0.33    0.58
   6   4   0    0.78    0.53
  -7  -4   0   21.95    2.30
   7   4   0   15.26    1.88
   9  -5   0    1.26    0.64
   9  -5   0    0.37    0.59
   8  -5   0   68.78    3.57
   8  -5   0   65.15    3.67
   7  -5   0    1.51    0.61
   7  -5   0    0.47    0.44
   6  -5   0   67.03    3.27
   6  -5   0   66.98    3.16
  -6   5   0   65.95    3.30
   5  -5   0    1.79    0.56
   5  -5   0    1.38    0.50
  -5   5   0    1.39    0.56
  -5   5   0    1.29    0.45
   4  -5   0   77.53    3.38
   4  -5   0   83.26    3.33
   4  -5   0   77.98    3.31
  -4   5   0   78.47    3.62
  -4   5   0   85.37    3.46
   3  -5   0   78.94    2.70
   3  -5   0   74.50    3.15
   3  -5   0   77.67    3.04
   3  -5   0   73.68    3.16
  -3   5   0   76.16    3.21
   2  -5   0  142.96    5.23
   2  -5   0  138.83    5.06
   2  -5   0  133.59    5.77
   2  -5   0  151.70    4.94
  -2   5   0  138.09    4.72
  -2   5   0  143.08    5.23
  -2   5   0  139.11    5.43
  -2   5   0  148.87    5.07
   1  -5   0  445.49   14.82
   1  -5   0  467.79   14.73
   1  -5   0  472.74   14.38
   1  -5   0  453.97   14.41
  -1   5   0  458.43   14.26
  -1   5   0  450.40   14.78
  -1   5   0  437.84   14.65
   0  -5   0  444.39   14.34
   0  -5   0  413.51   14.16
   0  -5   0  421.74   13.87
   0   5   0  448.46   14.27
   0   5   0  445.35   13.92
   0   5   0  451.76   14.22
  -1  -5   0   45.63    2.33
  -1  -5   0   51.65    2.31
   1   5   0   56.77    2.69
   1   5   0   50.77    2.42
   1   5   0   50.69    2.39
  -2  -5   0    8.15    1.07
  -2  -5   0    8.53    0.81
  -2  -5   0    8.24    1.22
  -2  -5   0    7.57    0.99
   2   5   0    8.88    1.08
   2   5   0    8.72    1.09
   2   5   0    9.32    1.27
  -3  -5   0   64.38    3.11
  -3  -5   0   64.24    2.99
   3   5   0   62.40    3.06
   3   5   0   65.01    2.98
  -4  -5   0    3.20    0.80
  -4  -5   0    3.84    0.87
   4   5   0    3.55    0.84
   4   5   0    3.47    0.81
  -5  -5   0   33.05    2.27
  -5  -5   0   30.28    2.19
   5   5   0   31.50    2.20
   5   5   0   30.96    2.17
  -6  -5   0   38.51    2.65
   6   5   0   39.80    2.65
  -7  -5   0    0.44    0.64
   7   5   0    1.40    0.75
   9  -6   0   82.17    4.29
   9  -6   0   83.86    4.55
   8  -6   0    0.46    0.58
   8  -6   0    0.88    0.55
   7  -6   0    3.78    0.90
   7  -6   0    2.46    0.72
   6  -6   0   26.19    1.79
   6  -6   0   24.88    1.85
  -6   6   0   25.91    1.99
   5  -6   0   26.58    1.66
   5  -6   0   22.74    1.66
  -5   6   0   25.62    1.74
  -5   6   0   23.22    1.84
   4  -6   0  103.47    4.24
   4  -6   0   98.12    4.02
  -4   6   0  102.80    4.27
  -4   6   0  109.06    4.62
   3  -6   0   72.95    3.07
   3  -6   0   77.37    2.75
   3  -6   0   79.78    3.30
  -3   6   0   78.32    3.40
  -3   6   0   74.44    2.72
  -3   6   0   73.57    3.58
   2  -6   0  328.64   11.14
   2  -6   0  353.56   10.92
   2  -6   0  337.86   10.81
  -2   6   0  367.51   11.74
  -2   6   0  323.65   11.37
  -2   6   0  324.35   10.77
  -2   6   0  343.70   11.15
   1  -6   0   17.34    1.05
   1  -6   0   14.81    1.37
   1  -6   0   18.31    1.24
  -1   6   0   15.14    1.29
  -1   6   0   18.39    1.47
  -1   6   0   18.25    1.14
   0  -6   0   44.85    2.22
   0   6   0   46.97    2.53
   0   6   0   46.51    2.24
  -1  -6   0   64.62    2.96
  -1  -6   0   63.73    2.85
   1   6   0   62.71    3.18
   1   6   0   59.59    2.86
  -2  -6   0   82.43    3.71
  -2  -6   0   82.56    3.56
   2   6   0   79.40    3.63
  -3  -6   0    3.42    0.85
  -3  -6   0    2.22    0.70
   3   6   0    4.75    0.97
   3   6   0    2.47    0.68
  -4  -6   0   89.00    4.35
  -4  -6   0   95.61    4.26
   4   6   0   96.22    4.39
   4   6   0   94.37    4.20
  -5  -6   0   27.01    2.17
   5   6   0   25.13    2.08
  -6  -6   0    0.16    0.61
   6   6   0    2.20    0.90
   9  -7   0    1.61    0.76
   9  -7   0    2.76    0.97
   8  -7   0    7.47    1.28
   8  -7   0    8.21    1.48
   7  -7   0    0.85    0.56
   7  -7   0    0.45    0.45
   6  -7   0    3.04    0.79
   6  -7   0    4.64    0.96
  -6   7   0    2.44    0.81
   5  -7   0    2.45    0.65
   5  -7   0    3.02    0.72
  -5   7   0    2.95    0.74
  -5   7   0    4.13    0.96
   4  -7   0  347.65   11.66
   4  -7   0  335.50   11.35
  -4   7   0  348.25   11.79
   3  -7   0   64.16    2.85
   3  -7   0   65.44    3.09
  -3   7   0   71.24    3.57
  -3   7   0   66.08    3.25
  -3   7   0   67.63    3.04
   2  -7   0    8.32    0.92
   2  -7   0    9.37    1.16
   2  -7   0    8.29    0.91
  -2   7   0    8.09    0.88
  -2   7   0    8.97    1.33
  -2   7   0    8.32    1.17
   1  -7   0  435.17   14.17
   1  -7   0  430.91   13.89
   1  -7   0  434.15   14.30
  -1   7   0  441.25   14.75
  -1   7   0  458.74   14.20
   0  -7   0   16.38    1.31
   0  -7   0   16.91    1.32
   0   7   0   16.64    1.29
  -1  -7   0  224.95    8.09
  -1  -7   0  224.67    8.26
   1   7   0  241.81    8.30
  -2  -7   0   72.26    3.39
  -2  -7   0   74.32    3.57
   2   7   0   69.99    3.48
  -3  -7   0    4.43    0.94
  -3  -7   0    2.19    0.76
   3   7   0    4.16    0.95
  -4  -7   0    2.41    0.86
   4   7   0    2.55    0.84
  -5  -7   0   47.39    3.06
   5   7   0   40.71    2.90
   9  -8   0    3.19    0.99
   9  -8   0    2.23    0.83
   8  -8   0    9.89    1.53
   8  -8   0    9.21    1.49
   7  -8   0    8.01    1.26
   7  -8   0    9.28    1.46
   6  -8   0   14.76    1.63
   6  -8   0   15.43    1.81
  -6   8   0   12.78    1.94
   5  -8   0  145.81    5.91
   5  -8   0  147.54    5.67
  -5   8   0  141.87    6.36
   4  -8   0  115.18    4.79
   4  -8   0  121.93    5.13
  -4   8   0  137.65    5.82
  -4   8   0  125.68    5.05
   3  -8   0   41.71    2.35
   3  -8   0   38.24    2.05
   2  -8   0    1.88    0.59
   2  -8   0    1.85    0.52
   2  -8   0    1.19    0.44
  -2   8   0    1.64    0.46
   1  -8   0   23.30    1.59
   1  -8   0   22.09    1.62
  -1   8   0   25.58    1.63
   0  -8   0   36.97    2.21
   0  -8   0   36.03    2.19
   0   8   0   37.07    2.17
  -1  -8   0   39.85    2.42
  -1  -8   0   43.88    2.57
   1   8   0   45.16    2.57
  -2  -8   0   89.92    4.24
  -2  -8   0   85.42    3.94
   2   8   0   82.63    4.07
  -3  -8   0   11.21    1.66
   3   8   0   12.84    1.75
  -4  -8   0    6.48    1.40
   4   8   0   11.53    1.80
  -5  -8   0    2.35    0.93
   5   8   0    2.55    1.04
   8  -9   0    0.81    0.65
   8  -9   0    1.57    0.80
   7  -9   0   13.53    1.81
   7  -9   0   13.15    1.75
   6  -9   0   86.41    4.18
   6  -9   0   78.24    3.82
  -6   9   0   79.92    4.51
   5  -9   0   44.26    2.48
   5  -9   0   37.38    2.53
  -5   9   0   47.11    2.67
   4  -9   0    0.10    0.37
   4  -9   0    0.33    0.36
   3  -9   0   61.11    3.16
   3  -9   0   59.47    2.81
   2  -9   0   18.99    1.91
   2  -9   0   15.29    1.57
  -2   9   0   17.86    1.35
   1  -9   0   29.13    1.99
   1  -9   0   26.20    1.85
  -1   9   0   29.04    1.90
   0  -9   0  151.67    6.18
   0  -9   0  148.11    6.11
   0   9   0  165.93    6.25
  -1  -9   0   75.11    3.94
  -1  -9   0   83.27    3.90
   1   9   0   80.81    3.96
  -2  -9   0    6.56    1.33
  -2  -9   0    6.97    1.44
   2   9   0   10.07    1.58
  -3  -9   0   13.04    1.86
   3   9   0   12.26    1.76
  -4  -9   0   12.96    1.97
   4   9   0    9.25    1.65
   8 -10   0   30.78    2.43
   8 -10   0   30.10    2.62
   7 -10   0   35.73    2.49
   7 -10   0   32.20    2.58
   6 -10   0    3.67    0.92
   6 -10   0    1.71    0.71
   5 -10   0   11.28    1.42
   5 -10   0   11.96    1.68
   4 -10   0   11.64    1.38
   4 -10   0   11.56    1.54
   3 -10   0   12.62    1.67
   2 -10   0    4.51    0.96
   2 -10   0    1.13    0.58
   1 -10   0   64.24    3.40
   1 -10   0   65.04    3.34
  -1  10   0   65.20    3.28
   0 -10   0   28.48    2.14
   0 -10   0   28.43    2.18
   0  10   0   31.00    2.19
  -1 -10   0   11.58    1.64
  -1 -10   0   10.04    1.60
   1  10   0   11.15    1.65
  -2 -10   0   15.25    2.06
   2  10   0   15.85    2.07
  -3 -10   0    7.39    1.57
   3  10   0    7.57    1.58
   7 -11   0    1.08    0.74
   7 -11   0    1.29    0.73
   6 -11   0   25.81    2.07
   6 -11   0   30.15    2.45
   5 -11   0   19.19    1.97
   5 -11   0   16.93    2.06
   4 -11   0   43.29    2.86
   3 -11   0   69.91    3.78
   2 -11   0   36.53    2.55
   1 -11   0   10.49    1.63
   1 -11   0   14.22    1.80
  -1  11   0   13.00    1.72
   0 -11   0   10.37    1.70
   0 -11   0   14.49    1.94
   0  11   0   11.57    1.73
  -1 -11   0    0.88    0.68
   1  11   0   -0.16    0.57
  -2 -11   0    0.63    0.81
   2  11   0    1.02    0.77
   6 -12   0    0.65    0.60
   6 -12   0    1.04    0.79
   5 -12   0   33.47    2.67
   4 -12   0   51.97    3.32
   3 -12   0   45.34    3.06
   2 -12   0    3.33    0.99
   1 -12   0    6.84    1.28
   1 -12   0    6.56    1.31
  -1  12   0    7.45    1.37
   0 -12   0    3.24    1.03
   0  12   0    2.11    0.93
   4 -13   0    3.46    1.14
   3 -13   0    2.06    0.97
   3 -13   1   11.73    1.82
   4 -13   1    3.85    1.23
   0  12  -1   45.25    3.12
   0 -12   1   53.79    3.37
   1 -12   1   42.68    3.30
   2 -12   1   35.12    2.57
   3 -12   1    0.79    0.65
   4 -12   1    9.04    1.50
   5 -12   1   11.23    1.57
   5 -12   1    9.60    1.63
   6 -12   1    2.89    1.00
   6 -12   1    1.95    0.79
   2  11  -1   36.26    2.78
  -2 -11   1   32.92    2.75
   1  11  -1   33.62    2.54
  -1 -11   1   28.59    2.92
   0  11  -1   35.60    2.56
   0 -11   1   40.08    2.72
  -1  11  -1   28.51    2.13
   1 -11   1   30.77    2.22
   1 -11   1   26.34    2.08
   2 -11   1    3.86    0.95
   3 -11   1   18.85    2.12
   4 -11   1    1.77    0.69
   4 -11   1    1.89    0.74
   5 -11   1    3.50    0.95
   5 -11   1    4.91    1.02
   6 -11   1   51.69    3.04
   6 -11   1   46.31    3.13
   7 -11   1   11.24    1.89
   7 -11   1   10.42    1.66
   3  10  -1   49.07    3.22
  -3 -10   1   42.33    3.13
   2  10  -1   69.18    3.90
  -2 -10   1   69.73    3.95
   1  10  -1    5.61    1.16
  -1 -10   1    6.13    1.28
   0  10  -1   66.74    3.49
   0 -10   1   65.26    3.38
   0 -10   1   68.55    3.57
  -1  10  -1   13.25    1.54
   1 -10   1   12.82    1.57
   1 -10   1   10.38    1.42
   2 -10   1    0.86    0.53
   3 -10   1   20.64    1.61
   3 -10   1   19.05    1.98
   4 -10   1    1.44    0.55
   4 -10   1    2.92    0.85
   5 -10   1   13.98    1.63
   5 -10   1   16.00    1.87
   6 -10   1    6.34    1.19
   6 -10   1    5.42    1.19
   7 -10   1    2.50    0.85
   7 -10   1    1.11    0.73
   8 -10   1    8.23    1.52
   8 -10   1    9.80    1.57
   4   9  -1    5.16    1.31
  -4  -9   1    2.83    1.07
   3   9  -1   61.73    3.62
  -3  -9   1   61.72    3.65
   2   9  -1    3.98    1.03
  -2  -9   1    5.25    1.17
   1   9  -1  115.38    4.97
  -1  -9   1  112.07    4.98
  -1  -9   1  105.15    4.71
   0   9  -1   40.33    2.42
   0  -9   1   41.35    2.46
   0  -9   1   35.97    2.24
  -1   9  -1   86.87    3.85
   1  -9   1   88.15    3.92
  -2   9  -1   91.81    3.77
   2  -9   1   89.54    3.75
   2  -9   1   88.29    3.98
   2  -9   1   85.80    3.73
   3  -9   1    0.18    0.33
   3  -9   1    0.20    0.36
   4  -9   1    1.70    0.58
   4  -9   1    0.32    0.40
  -5   9  -1    1.07    0.69
   5  -9   1    1.02    0.54
   5  -9   1   -0.01    0.38
   6  -9   1   56.84    3.14
   6  -9   1   59.57    3.36
   7  -9   1    4.86    1.12
   7  -9   1    4.20    1.10
   8  -9   1   15.71    2.08
   8  -9   1   16.17    2.01
   5   8  -1    0.10    0.55
  -5  -8   1    0.93    0.75
   4   8  -1  103.19    5.01
  -4  -8   1  104.01    5.07
   3   8  -1   28.22    2.20
  -3  -8   1   29.60    2.26
   2   8  -1   68.46    3.50
  -2  -8   1   65.13    3.47
   1   8  -1   14.90    1.69
  -1  -8   1   14.77    1.57
   0   8  -1   27.08    1.78
   0  -8   1   22.09    1.61
  -1   8  -1    5.13    0.86
   1  -8   1    4.36    0.77
   1  -8   1    5.16    0.90
  -2   8  -1   42.68    2.16
   2  -8   1   46.31    2.27
   2  -8   1   44.34    2.38
   3  -8   1    8.07    1.06
   3  -8   1    6.69    1.03
  -4   8  -1   42.43    2.90
  -4   8  -1   48.49    2.58
   4  -8   1   45.57    2.57
   4  -8   1   46.16    2.44
  -5   8  -1   19.99    1.94
  -5   8  -1   22.65    1.72
   5  -8   1   19.84    1.58
   5  -8   1   19.14    1.64
  -6   8  -1   17.44    2.18
   6  -8   1   17.59    1.95
   6  -8   1   16.92    1.77
   7  -8   1   18.17    2.04
   7  -8   1   19.22    2.09
   8  -8   1    0.25    0.58
   8  -8   1    0.62    0.57
   6   7  -1    4.54    1.15
  -6  -7   1    2.69    1.00
   5   7  -1   15.27    1.94
  -5  -7   1   16.02    2.01
   4   7  -1    9.26    1.44
  -4  -7   1    7.30    1.32
   3   7  -1    7.96    1.30
  -3  -7   1   13.83    1.68
   2   7  -1   -0.05    0.31
  -2  -7   1    0.26    0.41
   1   7  -1  121.17    4.81
  -1  -7   1  111.44    4.51
   0   7  -1    0.60    0.38
   0  -7   1    1.69    0.52
  -1   7  -1  261.50    8.89
  -1   7  -1  261.37    9.46
   1  -7   1  266.39    8.94
  -2   7  -1    0.43    0.26
  -2   7  -1    0.23    0.40
  -2   7  -1   -0.07    0.24
   2  -7   1    0.16    0.29
   2  -7   1    0.37    0.31
  -3   7  -1    1.22    0.53
  -3   7  -1    1.96    0.62
  -3   7  -1    1.65    0.58
   3  -7   1    1.02    0.42
   3  -7   1    1.81    0.55
  -4   7  -1   83.66    3.80
  -4   7  -1   81.00    3.49
  -4   7  -1   67.66    3.79
   4  -7   1   80.48    3.44
   4  -7   1   78.96    3.55
  -5   7  -1   15.80    2.05
   5  -7   1   16.04    1.65
   5  -7   1   12.85    1.52
  -6   7  -1  121.16    5.68
   6  -7   1  134.90    5.36
   6  -7   1  133.13    5.54
   7  -7   1   40.60    2.58
   7  -7   1   41.81    2.72
   8  -7   1   44.04    3.00
   8  -7   1   51.37    3.07
   9  -7   1    9.21    1.56
   9  -7   1    7.62    1.58
   6   6  -1    2.52    0.89
  -6  -6   1    2.24    0.89
   5   6  -1   -0.11    0.39
  -5  -6   1    0.27    0.48
   4   6  -1   27.22    2.03
  -4  -6   1   29.34    2.10
   3   6  -1   26.83    1.87
  -3  -6   1   24.40    1.66
   2   6  -1  228.73    8.21
  -2  -6   1  229.53    7.88
   1   6  -1   14.01    1.41
   1   6  -1   15.46    1.40
  -1  -6   1   14.78    1.16
   0   6  -1  176.02    6.72
   0   6  -1  187.86    6.37
   0  -6   1  174.13    6.23
  -1   6  -1  196.99    6.73
  -1   6  -1  190.89    7.20
  -1   6  -1  201.90    7.36
   1  -6   1  205.57    6.84
   1  -6   1  194.64    7.32
  -2   6  -1    4.24    0.84
  -2   6  -1    4.30    0.86
  -2   6  -1    4.27    0.59
   2  -6   1    4.47    0.70
   2  -6   1    4.40    0.70
  -3   6  -1    7.96    1.08
  -3   6  -1    9.46    1.38
  -3   6  -1    9.42    1.13
   3  -6   1    9.13    1.04
   3  -6   1    7.98    1.00
  -4   6  -1    0.44    0.37
  -4   6  -1    0.45    0.37
   4  -6   1    0.86    0.41
   4  -6   1    0.77    0.40
  -5   6  -1  129.01    5.36
  -5   6  -1  134.75    5.61
   5  -6   1  137.54    5.23
   5  -6   1  129.97    5.28
  -6   6  -1   14.82    1.92
   6  -6   1   13.15    1.55
   6  -6   1    9.93    1.33
   7  -6   1    1.72    0.70
   7  -6   1    1.49    0.60
   8  -6   1   43.85    2.96
   8  -6   1   41.93    2.73
   9  -6   1   51.50    3.24
   9  -6   1   47.61    3.33
   7   5  -1    0.94    0.63
  -7  -5   1    1.79    0.81
   6   5  -1    3.18    0.91
  -6  -5   1    3.01    0.95
   5   5  -1    4.31    0.94
  -5  -5   1    2.76    0.80
   4   5  -1   54.35    2.86
   4   5  -1   57.21    2.68
  -4  -5   1   48.46    2.58
  -4  -5   1   49.52    2.78
   3   5  -1  200.53    7.03
   3   5  -1  199.99    6.85
   3   5  -1  204.90    7.38
  -3  -5   1  202.03    7.05
   2   5  -1  195.49    7.24
   2   5  -1  192.51    7.00
  -2  -5   1  194.36    6.68
  -2  -5   1  199.08    6.71
   1   5  -1    1.93    0.49
   1   5  -1    2.04    0.50
   1   5  -1    1.80    0.52
  -1  -5   1    1.94    0.52
  -1  -5   1    2.14    0.47
   0   5  -1   25.29    1.63
   0   5  -1   25.61    1.43
   0   5  -1   27.58    1.67
   0  -5   1   26.97    1.40
   0  -5   1   27.50    1.71
   0  -5   1   26.24    1.63
  -1   5  -1   77.48    3.39
  -1   5  -1   81.93    3.51
  -1   5  -1   76.69    3.03
   1  -5   1   85.06    3.46
   1  -5   1   82.35    3.13
   1  -5   1   84.16    3.56
  -2   5  -1   20.06    1.48
  -2   5  -1   21.17    1.43
  -2   5  -1   22.43    1.30
  -2   5  -1   20.83    1.07
   2  -5   1   23.16    1.30
   2  -5   1   21.17    1.24
   2  -5   1   22.22    1.43
  -3   5  -1    2.33    0.32
  -3   5  -1    2.76    0.63
  -3   5  -1    2.01    0.63
   3  -5   1    2.00    0.48
   3  -5   1    2.75    0.61
   3  -5   1    3.59    0.62
  -4   5  -1   24.83    1.76
  -4   5  -1   25.44    1.64
   4  -5   1   25.78    1.62
   4  -5   1   26.43    1.56
  -5   5  -1   68.70    3.28
  -5   5  -1   70.97    3.40
   5  -5   1   69.41    3.14
   5  -5   1   69.38    3.24
  -6   5  -1   83.62    3.96
  -6   5  -1   85.24    3.95
   6  -5   1   90.80    3.91
   6  -5   1   85.26    3.95
   7  -5   1   34.26    2.26
   7  -5   1   35.23    2.39
   8  -5   1   11.76    1.79
   8  -5   1   13.69    1.75
   9  -5   1    1.10    0.83
   9  -5   1    2.59    0.91
   7   4  -1    0.92    0.60
  -7  -4   1    2.05    0.80
   6   4  -1    0.20    0.43
  -6  -4   1    0.16    0.51
   5   4  -1   75.05    3.59
   5   4  -1   75.53    3.45
  -5  -4   1   76.11    3.63
  -5  -4   1   80.09    3.60
   4   4  -1  143.18    5.58
   4   4  -1  146.92    5.22
   4   4  -1  141.70    5.35
  -4  -4   1  150.89    5.46
  -4  -4   1  136.66    6.98
   3   4  -1   43.08    2.40
   3   4  -1   43.69    2.02
   3   4  -1   48.40    2.18
   3   4  -1   46.01    2.33
  -3  -4   1   45.56    2.48
  -3  -4   1   43.93    2.12
   2   4  -1   19.16    1.26
   2   4  -1   19.76    1.17
   2   4  -1   18.14    1.34
   2   4  -1   22.11    1.19
   2   4  -1   19.80    1.09
  -2  -4   1   18.05    1.07
  -2  -4   1   18.46    1.14
   1   4  -1    1.14    0.35
   1   4  -1    0.40    0.26
   1   4  -1    0.51    0.27
  -1  -4   1    0.64    0.34
  -1  -4   1    0.81    0.31
   0   4  -1  207.75    6.83
   0   4  -1  204.61    7.08
   0   4  -1  203.87    7.11
   0  -4   1  203.66    7.06
   0  -4   1  212.69    7.15
  -1   4  -1    1.40    0.41
  -1   4  -1    1.47    0.30
  -1   4  -1    1.02    0.32
   1  -4   1    1.46    0.44
   1  -4   1    1.34    0.40
   1  -4   1    1.50    0.42
  -2   4  -1   14.96    1.15
  -2   4  -1   16.03    0.99
  -2   4  -1   15.33    1.09
  -2   4  -1   15.56    0.77
   2  -4   1   17.57    1.13
   2  -4   1   16.26    0.98
   2  -4   1   14.83    0.98
  -3   4  -1    6.38    0.95
  -3   4  -1    6.41    0.84
   3  -4   1    6.24    0.80
   3  -4   1    3.97    0.65
   3  -4   1    5.31    0.69
  -4   4  -1   35.99    2.02
  -4   4  -1   35.48    1.94
   4  -4   1   36.25    1.94
   4  -4   1   34.68    1.91
   4  -4   1   34.96    1.84
  -5   4  -1   78.24    3.52
  -5   4  -1   80.14    3.53
   5  -4   1   77.94    3.49
   5  -4   1   81.42    3.45
  -6   4  -1    9.79    1.33
  -6   4  -1   10.07    1.28
   6  -4   1   12.03    1.37
   6  -4   1   14.04    1.57
   7  -4   1   37.47    2.34
   7  -4   1   39.99    2.56
   8  -4   1    0.95    0.62
   8  -4   1    1.90    0.77
   9  -4   1   15.16    1.93
   9  -4   1   16.10    2.13
   7   3  -1   22.98    2.32
   6   3  -1   89.01    4.04
   6   3  -1   95.12    4.14
  -6  -3   1   95.16    4.20
  -6  -3   1   88.80    4.06
   5   3  -1   16.62    1.29
   5   3  -1   27.94    1.71
   5   3  -1   22.18    1.60
  -5  -3   1   26.60    1.69
  -5  -3   1   25.91    1.81
   4   3  -1   30.55    1.80
   4   3  -1   30.73    1.92
   4   3  -1   31.09    1.71
   4   3  -1   29.34    1.59
  -4  -3   1   28.93    1.93
  -4  -3   1   33.33    1.87
  -4  -3   1   28.94    1.68
   3   3  -1   24.84    1.52
   3   3  -1   27.30    1.38
   3   3  -1   26.96    1.42
   3   3  -1   27.72    1.66
  -3  -3   1   25.90    1.41
  -3  -3   1   25.23    1.45
  -3  -3   1   27.84    1.73
  -3  -3   1   27.11    1.67
   2   3  -1    1.83    0.44
   2   3  -1    0.93    0.30
   2   3  -1    1.69    0.36
  -2  -3   1    1.32    0.42
  -2  -3   1    1.35    0.29
   1   3  -1   66.01    2.70
   1   3  -1   72.71    2.90
   1   3  -1   68.37    2.72
  -1  -3   1   76.34    2.73
  -1  -3   1   74.74    2.93
   0   3  -1   57.46    2.40
   0   3  -1   58.39    2.23
   0   3  -1   58.15    2.41
   0  -3   1   62.24    2.43
   0  -3   1   60.10    2.42
  -1   3  -1  376.15   12.09
  -1   3  -1  369.38   12.39
  -1   3  -1  385.92   12.30
  -1   3  -1  386.18   11.96
   1  -3   1  394.30   12.43
   1  -3   1  428.66   12.35
  -2   3  -1  280.26    9.40
  -2   3  -1  279.07    9.26
   2  -3   1  276.46    9.11
   2  -3   1  309.98    9.31
   2  -3   1  284.90    9.15
  -3   3  -1    2.39    0.53
  -3   3  -1    3.02    0.56
   3  -3   1    3.40    0.56
   3  -3   1    2.73    0.49
   3  -3   1    2.72    0.50
  -4   3  -1    1.82    0.46
  -4   3  -1    1.66    0.44
   4  -3   1    1.62    0.42
   4  -3   1    1.91    0.47
   4  -3   1    1.54    0.45
  -5   3  -1   13.13    1.15
  -5   3  -1   12.69    1.04
   5  -3   1   13.29    1.35
   5  -3   1    9.19    1.07
  -6   3  -1   52.90    2.79
  -6   3  -1   49.64    2.43
   6  -3   1   49.92    2.60
   6  -3   1   54.36    2.84
   7  -3   1   20.24    1.77
   7  -3   1   21.04    1.65
   8  -3   1    2.40    0.84
   8  -3   1    4.05    0.94
   9  -3   1    7.31    1.30
   9  -3   1    7.89    1.48
   7   2  -1    7.19    1.15
   7   2  -1    6.20    1.11
  -7  -2   1    6.28    1.26
  -7  -2   1    7.06    1.24
   6   2  -1    0.55    0.47
   6   2  -1    0.03    0.30
   6   2  -1   -0.10    0.26
  -6  -2   1    0.25    0.44
  -6  -2   1   -0.22    0.25
  -6  -2   1   -0.05    0.34
   5   2  -1   80.78    3.44
   5   2  -1   77.38    3.57
   5   2  -1   82.95    3.45
   5   2  -1   83.42    3.36
  -5  -2   1   78.06    3.73
  -5  -2   1   78.67    3.43
  -5  -2   1   80.10    3.43
  -5  -2   1   82.95    3.74
   4   2  -1   28.86    1.52
   4   2  -1   29.72    1.59
   4   2  -1   28.38    1.62
   4   2  -1   28.21    1.70
  -4  -2   1   28.87    1.76
  -4  -2   1   28.71    1.57
  -4  -2   1   29.45    1.77
   3   2  -1    1.79    0.43
   3   2  -1    2.34    0.42
   3   2  -1    1.70    0.39
   3   2  -1    1.59    0.41
  -3  -2   1    2.24    0.51
  -3  -2   1    2.74    0.46
  -3  -2   1    1.98    0.47
  -3  -2   1    2.50    0.52
   2   2  -1  153.39    5.42
   2   2  -1  159.33    5.05
   2   2  -1  158.44    5.35
  -2  -2   1  161.03    5.47
   1   2  -1    9.40    0.60
   1   2  -1    8.21    0.60
   1   2  -1    9.91    0.70
  -1  -2   1    9.81    0.71
  -1  -2   1   10.52    0.60
  -1   2  -1  181.81    6.02
  -1   2  -1  195.07    6.23
   1  -2   1  178.86    6.26
   1  -2   1  208.86    6.24
  -2   2  -1   60.91    2.45
  -2   2  -1   61.66    2.49
   2  -2   1   68.89    2.50
  -3   2  -1   28.53    1.40
  -3   2  -1   25.17    1.41
   3  -2   1   27.15    1.40
   3  -2   1   24.33    1.30
   3  -2   1   25.92    1.41
  -4   2  -1    2.06    0.46
  -4   2  -1    1.70    0.47
  -4   2  -1    2.44    0.34
   4  -2   1    1.74    0.47
   4  -2   1    1.65    0.43
   4  -2   1    2.07    0.50
  -5   2  -1   15.51    1.05
  -5   2  -1   17.27    1.35
   5  -2   1   16.04    1.19
   5  -2   1   19.75    1.39
  -6   2  -1   33.32    2.16
   6  -2   1   35.70    2.18
   6  -2   1   33.72    1.98
   7  -2   1  108.54    4.86
   7  -2   1  106.88    4.57
   8  -2   1    0.39    0.48
   8  -2   1   -0.02    0.47
   9  -2   1   15.60    1.88
   9  -2   1   16.46    2.10
  -9  -1   1   16.73    2.45
   8   1  -1   35.82    2.53
   8   1  -1   36.48    2.35
  -8  -1   1   35.17    2.85
   7   1  -1   61.72    3.16
   7   1  -1   67.37    3.34
  -7  -1   1   68.00    3.85
   6   1  -1    0.67    0.43
   6   1  -1    1.05    0.38
   6   1  -1    1.40    0.51
  -6  -1   1    0.64    0.39
  -6  -1   1    1.77    0.62
   5   1  -1   14.53    1.10
   5   1  -1   14.25    1.07
   5   1  -1   14.33    1.18
   5   1  -1   13.53    1.12
  -5  -1   1   14.48    1.20
  -5  -1   1   14.39    1.09
   4   1  -1    0.09    0.14
   4   1  -1    0.74    0.33
   4   1  -1    1.11    0.35
  -4  -1   1    0.45    0.28
  -4  -1   1    0.68    0.33
   3   1  -1  815.02   24.84
   3   1  -1  771.95   24.77
  -3  -1   1  832.02   24.99
  -3  -1   1  829.13   24.98
   2   1  -1    5.73    0.48
  -2  -1   1    5.32    0.50
  -2  -1   1    5.28    0.49
   1   1  -1  137.81    4.33
   1   1  -1  139.07    4.52
  -1  -1   1  133.75    4.44
   0   1  -1  194.12    6.43
   0   1  -1  201.21    6.41
   0  -1   1  214.02    6.42
   0  -1   1  214.04    6.44
  -1   1  -1  271.80    8.45
  -1   1  -1  261.51    8.42
   1  -1   1  257.28    8.41
   1  -1   1  289.47    8.46
  -2   1  -1  445.84   14.07
  -2   1  -1  455.34   14.23
   2  -1   1  469.83   14.23
  -3   1  -1    8.90    0.63
  -3   1  -1    9.79    0.59
  -3   1  -1    7.35    0.73
  -3   1  -1    9.27    0.80
   3  -1   1    8.44    0.67
   3  -1   1    9.12    0.77
   3  -1   1    8.95    0.75
   3  -1   1    8.45    0.56
  -4   1  -1    3.27    0.67
  -4   1  -1    2.16    0.40
  -4   1  -1    1.89    0.50
   4  -1   1    1.94    0.51
   4  -1   1    2.99    0.56
   4  -1   1    1.49    0.33
   4  -1   1    1.66    0.45
  -5   1  -1  161.46    5.66
  -5   1  -1  164.51    6.17
   5  -1   1  153.26    5.76
   5  -1   1  168.43    5.56
   5  -1   1  159.00    6.03
   6  -1   1  106.06    4.51
   6  -1   1  101.11    4.20
   7  -1   1    0.59    0.49
   7  -1   1    0.75    0.45
   8  -1   1   33.93    2.25
   8  -1   1   31.19    2.44
   9  -1   1    7.42    1.52
   9   0  -1   23.21    2.37
  -9   0   1   29.08    2.77
   8   0  -1   16.73    1.81
   8   0  -1   18.20    2.02
  -8   0   1   16.68    2.27
   7   0  -1   19.64    1.62
   7   0  -1   19.33    1.52
   6   0  -1    4.42    0.82
   6   0  -1    7.23    1.00
  -6   0   1    5.39    0.92
   5   0  -1   11.22    0.85
   5   0  -1   11.84    1.17
   5   0  -1   12.21    1.05
   5   0  -1   11.42    0.99
  -5   0   1    9.77    0.83
  -5   0   1   11.23    1.00
  -5   0   1   11.41    1.02
   4   0  -1  269.75    8.78
   4   0  -1  270.32    8.61
   4   0  -1  277.25    8.83
   4   0  -1  257.32    8.71
  -4   0   1  257.77    8.79
  -4   0   1  271.32    8.82
   3   0  -1  279.43    9.11
   3   0  -1  284.24    9.10
   3   0  -1  293.41    9.13
   3   0  -1  289.21    9.01
  -3   0   1  281.05    9.10
  -3   0   1  292.16    9.13
   2   0  -1    0.89    0.22
   2   0  -1    0.99    0.18
   2   0  -1    0.75    0.21
  -2   0   1    1.23    0.24
  -2   0   1    0.90    0.21
   1   0  -1   70.20    2.28
   1   0  -1   78.72    2.40
  -1   0   1   74.23    2.39
  -1   0   1   70.37    2.29
   0   0  -1  206.11    6.61
   0   0  -1  214.64    6.65
   0   0   1  239.94    6.63
   0   0   1  200.36    6.64
  -1   0  -1  337.92   11.10
  -1   0  -1  352.57   11.27
  -1   0  -1  366.48   11.28
   1   0   1  401.12   11.32
  -2   0  -1  372.17   11.41
  -2   0  -1  336.19   11.34
  -2   0  -1  362.76   11.13
  -2   0  -1  350.49   10.99
  -2   0  -1  355.33   10.99
   2   0   1  379.10   11.41
  -3   0  -1    0.63    0.24
  -3   0  -1    0.51    0.29
  -3   0  -1    0.39    0.25
   3   0   1    0.50    0.27
   3   0   1    1.27    0.37
   3   0   1    0.66    0.23
   3   0   1    0.51    0.24
  -4   0  -1  200.78    7.12
  -4   0  -1  201.04    6.73
   4   0   1  201.05    6.69
   4   0   1  200.26    7.00
   4   0   1  199.69    6.74
  -5   0  -1   10.11    1.26
  -5   0  -1   12.36    1.19
   5   0   1    9.99    1.20
   5   0   1   11.31    0.92
   5   0   1   12.55    1.20
   6   0   1   28.27    1.74
   6   0   1   27.68    1.96
   7   0   1   34.03    2.11
   7   0   1   32.55    2.31
   8   0   1    4.77    1.16
   9  -1  -1    0.18    0.61
   9  -1  -1    0.08    0.46
  -9   1   1    0.25    0.62
   8  -1  -1    4.47    1.04
   8  -1  -1    7.10    1.15
  -8   1   1    5.20    1.32
   7  -1  -1   26.59    1.83
   7  -1  -1   27.78    1.95
   6  -1  -1  142.01    5.38
   6  -1  -1  140.79    5.28
  -6   1   1  131.74    5.56
   5  -1  -1    1.93    0.51
   5  -1  -1    2.96    0.45
   5  -1  -1    2.48    0.54
   5  -1  -1    3.24    0.58
  -5   1   1    2.76    0.46
  -5   1   1    2.03    0.51
  -5   1   1    2.86    0.55
   4  -1  -1   74.19    2.93
   4  -1  -1   70.82    2.88
   4  -1  -1   74.46    2.64
   4  -1  -1   75.46    2.88
  -4   1   1   73.13    2.62
  -4   1   1   72.15    2.84
  -4   1   1   75.16    2.87
   3  -1  -1  159.87    5.36
   3  -1  -1  168.89    5.48
  -3   1   1  166.53    5.37
  -3   1   1  162.58    5.34
  -3   1   1  165.47    5.36
   2  -1  -1  144.01    4.74
   2  -1  -1  146.07    4.56
  -2   1   1  147.30    4.57
  -2   1   1  143.33    4.72
   0  -1  -1  473.60   15.49
   0  -1  -1  509.67   15.51
   0  -1  -1  506.63   15.51
   0   1   1  517.93   15.50
   0   1   1  539.04   15.54
  -1  -1  -1  922.70   27.67
  -1  -1  -1  870.04   27.79
  -1  -1  -1  869.05   27.80
   1   1   1  999.21   27.87
  -2  -1  -1  125.38    4.20
  -2  -1  -1  116.18    4.23
  -2  -1  -1  120.94    4.39
  -2  -1  -1  122.62    4.41
   2   1   1  124.74    4.42
   2   1   1  121.62    4.18
   2   1   1  122.67    4.36
   2   1   1  118.33    4.24
  -3  -1  -1   84.18    3.14
  -3  -1  -1   81.32    3.39
  -3  -1  -1   80.48    3.38
   3   1   1   81.92    3.22
   3   1   1   81.52    2.95
   3   1   1   80.26    3.34
   3   1   1   79.89    3.10
   3   1   1   80.23    3.37
  -4  -1  -1    1.35    0.50
  -4  -1  -1    1.19    0.44
   4   1   1    1.50    0.38
   4   1   1    1.67    0.44
   4   1   1    2.09    0.55
  -5  -1  -1    1.48    0.48
  -5  -1  -1    0.29    0.33
   5   1   1    0.65    0.43
   5   1   1    0.19    0.21
   5   1   1    0.45    0.28
  -6  -1  -1    0.58    0.45
   6   1   1    0.64    0.39
   6   1   1    2.55    0.77
   6   1   1    0.28    0.30
  -7  -1  -1   17.46    2.02
   7   1   1   18.37    2.04
  -8  -1  -1    0.62    0.75
   8   1   1    3.20    1.05
   9  -2  -1   20.19    2.19
   9  -2  -1   21.50    2.30
  -9   2   1   24.54    2.93
   8  -2  -1    4.06    0.97
   8  -2  -1    3.06    0.83
   7  -2  -1   88.42    3.92
   7  -2  -1   88.14    4.04
   6  -2  -1   73.33    3.30
   6  -2  -1   78.00    3.44
   5  -2  -1  122.02    4.64
   5  -2  -1  129.40    4.60
   5  -2  -1  125.33    4.72
  -5   2   1  119.78    4.41
  -5   2   1  128.92    4.59
  -5   2   1  122.14    4.57
   4  -2  -1   88.86    3.31
   4  -2  -1   90.92    3.42
   4  -2  -1   91.10    3.47
  -4   2   1   93.20    3.38
  -4   2   1   86.93    3.30
   3  -2  -1   16.47    0.96
   3  -2  -1   16.32    0.97
   3  -2  -1   17.22    0.87
  -3   2   1   17.46    0.88
  -3   2   1   16.65    1.01
   2  -2  -1    0.77    0.28
   2  -2  -1    0.59    0.17
  -2   2   1    0.80    0.26
  -2   2   1    0.98    0.21
   1  -2  -1   88.37    3.01
   1  -2  -1   91.63    3.19
  -1   2   1   88.52    3.17
  -1   2   1   84.76    2.99
   0  -2  -1  129.99    4.40
   0  -2  -1  114.72    4.18
   0  -2  -1  131.31    4.32
   0  -2  -1  128.71    4.44
   0   2   1  129.99    4.31
   0   2   1  143.15    4.43
   0   2   1  139.91    4.44
  -1  -2  -1  366.99   11.82
  -1  -2  -1  335.82   11.50
  -1  -2  -1  384.00   11.68
   1   2   1  361.51   11.64
   1   2   1  386.64   11.55
   1   2   1  398.84   11.84
  -2  -2  -1   77.95    3.05
  -2  -2  -1   78.12    3.25
  -2  -2  -1   82.54    3.30
  -2  -2  -1   75.75    3.03
   2   2   1   79.43    3.22
   2   2   1   82.38    3.09
   2   2   1   80.06    3.05
   2   2   1   76.21    2.74
  -3  -2  -1   11.02    0.91
  -3  -2  -1   10.04    1.17
  -3  -2  -1   10.96    0.93
   3   2   1    7.37    0.85
   3   2   1   11.02    0.72
   3   2   1   11.53    1.02
   3   2   1   10.76    0.93
  -4  -2  -1   25.05    1.80
  -4  -2  -1   25.74    1.58
  -4  -2  -1   25.74    1.64
   4   2   1   22.61    1.66
   4   2   1   22.87    1.49
   4   2   1   24.78    1.34
   4   2   1   27.67    1.68
  -5  -2  -1    0.12    0.38
  -5  -2  -1    0.03    0.33
   5   2   1    0.71    0.39
   5   2   1    0.88    0.49
   5   2   1    0.23    0.43
  -6  -2  -1   10.05    1.43
  -6  -2  -1   12.25    1.53
   6   2   1   11.14    1.50
   6   2   1   10.61    1.31
  -7  -2  -1   25.75    2.15
   7   2   1   26.24    2.16
  -8  -2  -1   17.88    2.26
   8   2   1   16.96    2.17
   9  -3  -1    9.03    1.53
   9  -3  -1    8.00    1.31
  -9   3   1    8.80    1.77
   8  -3  -1   87.43    4.28
   8  -3  -1   89.94    4.17
   7  -3  -1    6.15    1.08
   7  -3  -1    6.43    1.06
  -7   3   1    5.04    0.74
   6  -3  -1   97.99    4.08
   6  -3  -1  104.06    4.20
  -6   3   1   95.74    3.87
   5  -3  -1    2.99    0.60
   5  -3  -1    1.84    0.49
   5  -3  -1    2.44    0.50
  -5   3   1    1.69    0.46
  -5   3   1    2.43    0.50
   4  -3  -1   98.79    3.79
   4  -3  -1  101.47    3.61
   4  -3  -1  101.32    3.73
  -4   3   1   92.94    3.79
  -4   3   1   98.96    3.60
   3  -3  -1   23.00    1.11
   3  -3  -1   20.69    1.20
   3  -3  -1   20.97    1.15
  -3   3   1   21.48    1.11
  -3   3   1   20.93    1.30
   2  -3  -1  118.72    4.24
   2  -3  -1  109.27    4.16
   2  -3  -1  111.20    3.89
  -2   3   1  114.19    3.90
   1  -3  -1    0.07    0.07
   1  -3  -1    0.10    0.17
   1  -3  -1    0.10    0.18
  -1   3   1    0.17    0.16
  -1   3   1    0.46    0.17
  -1   3   1    0.07    0.17
   0  -3  -1    4.01    0.58
   0  -3  -1    2.93    0.49
   0  -3  -1    2.37    0.48
   0   3   1    3.41    0.54
   0   3   1    5.98    0.73
   0   3   1    4.17    0.53
  -1  -3  -1   36.59    1.85
  -1  -3  -1   37.13    1.65
  -1  -3  -1   34.97    1.84
  -1  -3  -1   34.56    1.68
  -1  -3  -1   34.63    1.66
   1   3   1   32.75    1.63
   1   3   1   38.04    1.84
   1   3   1   35.56    1.67
   1   3   1   36.17    1.62
  -2  -3  -1    9.58    0.68
  -2  -3  -1    8.82    1.10
  -2  -3  -1    9.31    1.00
  -2  -3  -1    9.36    1.03
  -2  -3  -1   11.06    1.23
   2   3   1   10.85    0.72
   2   3   1    9.86    0.83
   2   3   1    9.31    0.96
   2   3   1    9.62    0.93
  -3  -3  -1   94.64    3.87
  -3  -3  -1   94.76    3.87
  -3  -3  -1   92.33    4.14
   3   3   1   96.53    4.10
   3   3   1   99.39    3.89
   3   3   1  100.24    3.90
   3   3   1   98.28    3.45
  -4  -3  -1    0.06    0.37
  -4  -3  -1    0.59    0.37
   4   3   1    0.07    0.33
   4   3   1    0.38    0.37
  -5  -3  -1   78.11    3.73
  -5  -3  -1   75.90    3.63
   5   3   1   78.11    3.59
   5   3   1   80.77    3.73
  -6  -3  -1   67.86    3.61
  -6  -3  -1   67.29    3.45
   6   3   1   67.49    3.56
   6   3   1   66.62    3.37
  -7  -3  -1    0.32    0.67
   7   3   1    1.32    0.80
   9  -4  -1   33.11    2.43
   9  -4  -1   35.81    2.62
  -9   4   1   32.86    2.96
   8  -4  -1    7.44    1.29
   8  -4  -1    8.63    1.37
   7  -4  -1   96.04    4.32
   7  -4  -1   96.62    4.23
  -7   4   1   95.80    4.06
   6  -4  -1   26.74    1.69
   6  -4  -1   25.35    1.72
  -6   4   1   24.98    1.67
   5  -4  -1   11.07    0.92
   5  -4  -1   13.75    1.38
   5  -4  -1   12.48    1.25
  -5   4   1   10.88    0.92
  -5   4   1   11.64    1.08
   4  -4  -1   43.39    1.96
   4  -4  -1   43.19    2.11
  -4   4   1   40.91    1.94
  -4   4   1   43.63    2.24
   3  -4  -1    6.08    0.77
   3  -4  -1    5.36    0.65
   3  -4  -1    5.50    0.65
  -3   4   1    6.47    0.63
  -3   4   1    6.11    0.90
   2  -4  -1  281.86    8.96
   2  -4  -1  295.41    9.67
   2  -4  -1  277.21    9.30
   2  -4  -1  285.86    9.32
  -2   4   1  280.28    8.94
  -2   4   1  282.07    9.32
  -2   4   1  310.53    9.69
   1  -4  -1    0.23    0.22
   1  -4  -1    0.23    0.17
   1  -4  -1    0.15    0.21
   1  -4  -1    0.25    0.21
  -1   4   1    0.07    0.18
  -1   4   1    0.25    0.24
  -1   4   1    0.37    0.19
  -1   4   1    0.10    0.21
   0  -4  -1  186.79    6.66
   0  -4  -1  181.32    6.54
   0  -4  -1  189.36    6.40
   0  -4  -1  173.14    6.37
   0   4   1  194.79    6.39
   0   4   1  203.62    6.61
   0   4   1  200.02    6.65
  -1  -4  -1  160.17    5.85
  -1  -4  -1  148.18    5.71
  -1  -4  -1  159.56    5.48
  -1  -4  -1  146.25    5.40
  -1  -4  -1  149.30    5.48
   1   4   1  163.89    5.75
   1   4   1  161.81    5.49
   1   4   1  144.46    5.42
   1   4   1  156.86    5.43
  -2  -4  -1   43.56    2.41
  -2  -4  -1   43.70    2.19
  -2  -4  -1   45.94    2.26
  -2  -4  -1   45.45    2.00
   2   4   1   41.93    1.99
   2   4   1   46.66    2.22
   2   4   1   42.07    2.15
   2   4   1   46.33    2.41
  -3  -4  -1  121.38    5.83
  -3  -4  -1  136.00    5.09
  -3  -4  -1  125.34    4.98
   3   4   1  126.84    4.98
   3   4   1  128.86    4.97
   3   4   1  126.71    5.76
  -4  -4  -1    1.32    0.58
  -4  -4  -1    3.86    0.87
   4   4   1    1.88    0.65
   4   4   1    2.57    0.69
  -5  -4  -1   21.46    1.81
  -5  -4  -1   18.58    1.91
   5   4   1   20.64    2.04
   5   4   1   17.84    1.82
  -6  -4  -1   11.03    1.63
  -6  -4  -1   15.71    2.05
   6   4   1   14.39    1.89
   6   4   1   11.96    1.58
  -7  -4  -1   13.59    2.06
   7   4   1   13.45    1.93
   7   4   1   14.75    2.42
   9  -5  -1   50.85    3.20
   9  -5  -1   59.22    3.55
  -9   5   1   62.51    4.15
   8  -5  -1   15.59    1.86
   8  -5  -1   15.54    1.80
   7  -5  -1   14.14    1.63
   7  -5  -1   15.13    1.63
  -7   5   1   11.04    1.48
   6  -5  -1    0.75    0.42
   6  -5  -1    0.27    0.39
  -6   5   1    0.88    0.46
   5  -5  -1   32.31    1.82
   5  -5  -1   31.17    1.72
   5  -5  -1   32.09    1.89
  -5   5   1   29.97    1.97
  -5   5   1   31.72    1.78
   4  -5  -1  123.37    4.89
   4  -5  -1  130.58    4.79
   4  -5  -1  134.35    4.80
  -4   5   1  129.35    4.82
  -4   5   1  132.66    5.23
   3  -5  -1  191.05    6.00
   3  -5  -1  194.23    6.40
   3  -5  -1  182.18    6.58
   3  -5  -1  183.10    6.51
  -3   5   1  188.48    6.00
  -3   5   1  192.02    6.95
  -3   5   1  190.13    6.57
   2  -5  -1   94.70    3.77
   2  -5  -1   93.76    4.01
   2  -5  -1   95.12    3.36
   2  -5  -1   85.89    3.61
   2  -5  -1   95.00    3.40
  -2   5   1   95.35    3.76
  -2   5   1   93.11    3.35
  -2   5   1  104.09    4.07
   1  -5  -1  165.63    5.55
   1  -5  -1  163.82    5.72
   1  -5  -1  160.45    5.89
   1  -5  -1  155.77    5.97
  -1   5   1  163.87    5.99
  -1   5   1  164.79    5.51
  -1   5   1  153.41    5.80
   0  -5  -1   16.35    1.28
   0  -5  -1   17.91    1.20
   0  -5  -1   16.11    1.23
   0   5   1   19.15    1.32
   0   5   1   18.15    1.17
   0   5   1   16.77    1.29
  -1  -5  -1   70.32    3.31
  -1  -5  -1   73.80    3.03
  -1  -5  -1   66.05    3.02
  -1  -5  -1   68.22    3.06
   1   5   1   70.36    3.03
   1   5   1   69.63    3.24
  -2  -5  -1   17.01    1.32
  -2  -5  -1   15.45    1.29
  -2  -5  -1   16.18    1.44
   2   5   1   15.86    1.26
   2   5   1   16.13    1.28
   2   5   1   16.69    1.46
  -3  -5  -1  130.20    5.21
  -3  -5  -1  134.47    5.31
   3   5   1  130.43    5.17
   3   5   1  126.37    5.20
  -4  -5  -1    0.20    0.40
  -4  -5  -1    0.30    0.45
   4   5   1   -0.19    0.41
   4   5   1    0.27    0.39
  -5  -5  -1    3.78    1.00
  -5  -5  -1    6.11    1.27
   5   5   1    4.90    1.06
   5   5   1    6.10    1.13
  -6  -5  -1   26.42    2.20
  -6  -5  -1   26.85    2.73
   6   5   1   30.18    2.36
   6   5   1   23.47    2.04
   9  -6  -1    3.70    1.08
   9  -6  -1    2.79    0.87
  -9   6   1    1.54    0.82
   8  -6  -1   62.31    3.46
   8  -6  -1   58.88    3.28
   7  -6  -1   36.68    2.41
   7  -6  -1   38.13    2.35
   6  -6  -1  105.08    4.26
   6  -6  -1   94.18    4.30
  -6   6   1   96.51    4.52
   5  -6  -1  195.83    7.38
   5  -6  -1  192.18    7.20
  -5   6   1  209.34    7.32
  -5   6   1  215.83    7.81
   4  -6  -1    1.97    0.52
   4  -6  -1    2.28    0.56
   4  -6  -1    1.89    0.56
  -4   6   1    3.17    0.65
  -4   6   1    1.34    0.51
   3  -6  -1   -0.07    0.24
   3  -6  -1    0.14    0.18
   3  -6  -1   -0.08    0.20
   3  -6  -1   -0.25    0.19
  -3   6   1    0.50    0.32
  -3   6   1    0.59    0.22
  -3   6   1    0.01    0.28
  -3   6   1    0.20    0.25
   2  -6  -1  125.14    5.26
   2  -6  -1  132.36    4.53
   2  -6  -1  127.68    4.55
   2  -6  -1  128.81    4.89
  -2   6   1  124.86    5.22
  -2   6   1  130.04    4.55
  -2   6   1  129.90    5.03
  -2   6   1  133.09    4.82
   1  -6  -1   76.19    3.09
   1  -6  -1   69.44    3.18
   1  -6  -1   73.34    2.94
  -1   6   1   78.67    3.07
  -1   6   1   73.60    3.38
  -1   6   1   78.72    3.54
   0  -6  -1   10.18    1.15
   0  -6  -1    9.60    1.12
   0   6   1   11.56    1.37
   0   6   1   12.89    1.02
  -1  -6  -1    9.81    1.16
  -1  -6  -1    8.38    1.10
   1   6   1    7.93    1.04
  -2  -6  -1  385.20   12.81
  -2  -6  -1  377.12   12.61
   2   6   1  371.46   12.71
  -3  -6  -1    0.34    0.63
  -3  -6  -1   -0.07    0.41
   3   6   1   -0.32    0.38
   3   6   1   -0.20    0.32
  -4  -6  -1   14.41    1.77
  -4  -6  -1   15.45    1.86
   4   6   1   14.36    1.81
   4   6   1   15.77    1.82
  -5  -6  -1   29.38    2.35
  -5  -6  -1   31.17    2.41
   5   6   1   30.29    2.30
   5   6   1   30.20    2.36
  -6  -6  -1    0.36    0.59
   6   6   1    0.14    0.47
   9  -7  -1    0.39    0.63
   9  -7  -1    0.67    0.64
  -9   7   1   -0.27    0.46
   8  -7  -1   61.46    3.36
   8  -7  -1   58.57    3.45
  -8   7   1   63.98    3.99
   7  -7  -1   14.59    1.68
   7  -7  -1   15.50    1.74
   6  -7  -1   25.80    1.96
   6  -7  -1   32.68    2.02
  -6   7   1   30.52    2.29
   5  -7  -1   94.57    4.22
   5  -7  -1   94.95    3.99
  -5   7   1   98.42    4.20
  -5   7   1   93.26    4.50
   4  -7  -1   39.44    2.02
   4  -7  -1   34.14    2.11
  -4   7   1   39.51    2.25
  -4   7   1   40.79    2.59
  -4   7   1   36.07    2.12
   3  -7  -1    9.51    1.16
   3  -7  -1   11.52    1.14
   3  -7  -1   10.39    0.84
  -3   7   1    9.47    1.19
  -3   7   1   12.90    1.40
  -3   7   1   11.53    1.61
  -3   7   1   11.11    0.83
   2  -7  -1    0.07    0.23
   2  -7  -1   -0.18    0.21
   2  -7  -1   -0.07    0.21
  -2   7   1   -0.20    0.16
  -2   7   1    0.30    0.25
   1  -7  -1    2.76    0.62
   1  -7  -1    3.05    0.69
  -1   7   1    2.88    0.70
  -1   7   1    2.42    0.56
   0  -7  -1    0.02    0.29
   0  -7  -1    0.20    0.42
   0   7   1    0.77    0.41
  -1  -7  -1   44.43    2.54
  -1  -7  -1   47.25    2.58
   1   7   1   46.55    2.54
  -2  -7  -1   15.91    1.76
  -2  -7  -1   17.30    1.91
   2   7   1   18.63    1.92
  -3  -7  -1   57.76    3.15
  -3  -7  -1   56.67    3.26
   3   7   1   64.38    3.38
  -4  -7  -1    9.18    1.49
  -4  -7  -1    7.15    1.35
   4   7   1    9.49    1.53
   4   7   1    9.68    1.49
  -5  -7  -1   12.75    1.88
   5   7   1   12.01    1.74
   9  -8  -1   20.71    2.38
   9  -8  -1   22.60    2.49
  -9   8   1   20.62    2.75
   8  -8  -1   23.48    2.43
   8  -8  -1   27.20    2.28
  -8   8   1   25.57    2.47
   7  -8  -1   25.56    1.94
   7  -8  -1   28.68    2.19
  -7   8   1   22.83    2.16
   6  -8  -1    0.83    0.49
   6  -8  -1    1.61    0.64
  -6   8   1    0.14    0.42
  -6   8   1    1.14    0.66
   5  -8  -1   39.08    2.39
   5  -8  -1   36.44    2.10
  -5   8   1   33.34    2.51
  -5   8   1   35.08    2.30
   4  -8  -1  102.66    4.24
   4  -8  -1  106.96    4.64
  -4   8   1  107.12    4.51
  -4   8   1  112.34    5.15
  -4   8   1  106.71    4.70
   3  -8  -1   11.55    1.43
   3  -8  -1   10.69    1.12
  -3   8   1   14.24    1.57
  -3   8   1   10.67    1.38
   2  -8  -1   17.07    1.73
   2  -8  -1   13.03    1.09
  -2   8   1   13.43    1.11
   1  -8  -1  215.91    7.75
   1  -8  -1  209.97    7.91
  -1   8   1  227.15    7.78
   0  -8  -1   56.61    2.97
   0  -8  -1   59.17    3.04
   0   8   1   59.84    2.98
  -1  -8  -1    4.13    0.96
  -1  -8  -1    2.92    0.80
   1   8   1    2.76    0.78
  -2  -8  -1    2.35    0.82
  -2  -8  -1    2.87    0.84
   2   8   1    2.50    0.77
  -3  -8  -1    3.48    0.97
  -3  -8  -1    2.61    0.90
   3   8   1    6.07    1.26
  -4  -8  -1    5.51    1.30
   4   8   1    5.32    1.27
   9  -9  -1    9.20    1.65
   9  -9  -1    9.95    1.68
  -9   9   1   11.34    1.93
   8  -9  -1   49.47    3.06
   8  -9  -1   50.83    3.33
  -8   9   1   49.76    3.51
   7  -9  -1   -0.59    0.35
   7  -9  -1    0.82    0.64
  -7   9   1    0.21    0.46
   6  -9  -1   15.41    1.68
   6  -9  -1   14.00    1.75
  -6   9   1    9.73    1.60
   5  -9  -1    7.68    1.13
   5  -9  -1    6.87    1.19
  -5   9   1    7.80    1.35
   4  -9  -1    1.53    0.66
   4  -9  -1    0.61    0.45
  -4   9   1    1.25    0.59
   3  -9  -1   29.14    2.08
   2  -9  -1   79.20    3.85
  -2   9   1   81.71    3.54
   1  -9  -1    7.03    1.11
   1  -9  -1    9.51    1.36
  -1   9   1    7.87    1.19
   0  -9  -1   18.05    2.01
   0  -9  -1   19.85    2.07
   0   9   1   20.33    2.04
  -1  -9  -1    2.28    0.77
  -1  -9  -1    1.02    0.57
   1   9   1    1.48    0.67
  -2  -9  -1    8.65    1.48
  -2  -9  -1    8.65    1.55
   2   9   1    6.74    1.34
  -3  -9  -1   13.32    1.98
   3   9   1   11.47    1.74
   8 -10  -1    1.58    0.76
   8 -10  -1    2.36    0.84
   7 -10  -1    3.19    0.96
   7 -10  -1    2.16    0.77
   6 -10  -1    3.56    1.01
   6 -10  -1    2.14    0.73
   5 -10  -1   13.58    1.53
   5 -10  -1   10.59    1.53
   4 -10  -1   13.60    1.81
   3 -10  -1   35.57    2.46
   2 -10  -1    0.68    0.40
   2 -10  -1   -0.19    0.38
  -2  10   1   -0.15    0.28
   1 -10  -1   30.90    2.18
   1 -10  -1   38.19    2.51
  -1  10   1   33.89    2.24
   0 -10  -1    4.22    1.07
   0 -10  -1    8.80    1.44
   0  10   1    9.63    1.51
  -1 -10  -1    9.53    1.58
  -1 -10  -1    8.35    1.51
   1  10   1   10.32    1.58
  -2 -10  -1    2.11    1.32
  -2 -10  -1    4.16    1.20
   2  10   1    5.04    1.20
   7 -11  -1   -0.16    0.52
   7 -11  -1   -0.10    0.50
   6 -11  -1  143.85    6.43
   6 -11  -1  136.88    5.85
   5 -11  -1    1.00    0.67
   4 -11  -1   12.74    1.83
   3 -11  -1   21.79    2.36
   2 -11  -1   13.56    1.81
   1 -11  -1    2.82    0.99
   1 -11  -1    2.95    0.88
  -1  11   1    1.79    0.76
   0 -11  -1   -0.07    0.57
   0 -11  -1    0.35    0.57
   0  11   1    0.53    0.53
  -1 -11  -1   44.44    3.19
  -1 -11  -1   47.62    3.41
   1  11   1   49.68    3.22
   6 -12  -1    0.15    0.65
   5 -12  -1   68.37    4.04
   4 -12  -1  104.33    5.24
   3 -12  -1    2.30    0.84
   2 -12  -1   21.97    2.40
   1 -12  -1   29.12    2.45
   1 -12  -1   41.56    2.89
  -1  12   1   34.20    2.52
   0 -12  -1   32.93    2.68
   0 -12  -1   34.65    2.73
   0  12   1   33.23    2.59
   1  12  -2    5.01    1.31
  -1 -12   2    5.94    1.36
   0  12  -2   72.06    3.95
   0 -12   2   65.48    3.87
   3 -12   2   45.50    2.93
   4 -12   2   40.75    2.83
   4 -12   2   40.88    2.65
   5 -12   2    5.79    1.26
   5 -12   2    5.46    1.19
   6 -12   2   21.83    2.33
   6 -12   2   23.88    2.66
   2  11  -2   18.82    2.30
  -2 -11   2   19.34    2.38
   1  11  -2    3.33    0.97
  -1 -11   2    3.65    1.00
   0  11  -2    1.44    0.70
   0 -11   2    2.22    0.87
  -1  11  -2   21.98    1.87
   1 -11   2   24.08    1.98
   2 -11   2    2.25    0.78
   3 -11   2   37.16    2.39
   3 -11   2   38.28    2.52
   4 -11   2   20.93    2.17
   4 -11   2   23.56    2.40
   5 -11   2   27.57    2.14
   5 -11   2   33.05    2.46
   6 -11   2   26.90    2.64
   6 -11   2   28.50    2.40
   7 -11   2    3.27    1.10
   7 -11   2    2.26    0.89
   3  10  -2    1.32    0.81
  -3 -10   2    2.66    1.00
   2  10  -2    1.34    0.73
  -2 -10   2    3.83    1.14
   1  10  -2  100.41    4.77
   0  10  -2   50.27    2.93
  -1  10  -2   24.67    1.86
   1 -10   2   25.76    1.87
   2 -10   2    0.18    0.37
   2 -10   2    0.30    0.45
   3 -10   2   13.45    1.58
   3 -10   2   10.77    1.46
   4 -10   2   75.33    3.59
   4 -10   2   69.05    3.64
   5 -10   2    8.71    1.36
   5 -10   2    9.81    1.52
   6 -10   2    4.37    1.10
   6 -10   2    4.13    1.01
   7 -10   2   20.73    2.29
   7 -10   2   18.36    2.21
   4   9  -2   30.75    2.52
  -4  -9   2   33.78    2.66
   3   9  -2   17.45    2.14
  -3  -9   2   20.28    2.37
   2   9  -2   38.48    2.60
   1   9  -2  115.55    5.09
   0   9  -2    9.33    1.29
   0  -9   2   13.54    1.46
  -1   9  -2   27.29    1.88
   1  -9   2   26.50    1.80
   1  -9   2   30.60    1.88
  -2   9  -2  167.34    6.25
   2  -9   2  166.64    6.25
   2  -9   2  168.64    6.38
   3  -9   2   22.60    1.72
   3  -9   2   26.00    1.74
   4  -9   2   30.08    2.03
   4  -9   2   25.17    1.84
  -5   9  -2    0.40    0.72
   5  -9   2    3.11    0.79
   5  -9   2    2.04    0.76
   6  -9   2    6.58    1.28
   7  -9   2    2.38    0.86
   7  -9   2    1.97    0.73
   8  -9   2   33.18    2.72
   8  -9   2   35.32    2.66
   5   8  -2    1.24    0.66
  -5  -8   2    0.57    0.59
   4   8  -2    1.62    0.72
  -4  -8   2    1.67    0.85
   3   8  -2    5.38    1.15
   2   8  -2    0.26    0.42
   1   8  -2    9.71    1.38
   0   8  -2  318.04   10.99
   0  -8   2  326.57   10.80
  -1   8  -2  155.30    5.85
   1  -8   2  160.14    5.86
  -2   8  -2   55.37    2.57
   2  -8   2   57.33    2.71
   2  -8   2   55.78    2.72
   3  -8   2    2.76    0.66
   3  -8   2    2.57    0.63
  -4   8  -2   34.99    2.65
   4  -8   2   43.11    2.32
   4  -8   2   36.86    2.26
  -5   8  -2   70.35    4.02
  -5   8  -2   71.25    3.42
   5  -8   2   73.63    3.48
   5  -8   2   67.69    3.50
  -6   8  -2   21.87    2.08
   6  -8   2   20.06    2.05
   6  -8   2   15.20    1.78
   7  -8   2   21.42    2.31
   7  -8   2   25.55    2.49
   8  -8   2   55.78    3.49
   8  -8   2   49.68    3.20
   6   7  -2    1.85    0.80
  -6  -7   2    1.68    0.84
   5   7  -2   -0.29    0.39
  -5  -7   2   -0.31    0.43
   4   7  -2    9.69    1.42
   3   7  -2   61.94    3.32
   2   7  -2   34.72    2.21
   1   7  -2   -0.09    0.29
  -1  -7   2    0.00    0.31
   0   7  -2    1.33    0.45
   0  -7   2    1.77    0.50
  -1   7  -2    5.02    0.97
  -1   7  -2    4.82    0.80
   1  -7   2    6.67    0.89
  -2   7  -2  100.84    4.55
  -2   7  -2  107.52    4.77
  -2   7  -2  105.33    3.94
   2  -7   2  102.68    4.09
   2  -7   2  103.98    4.13
  -3   7  -2  111.97    4.98
  -3   7  -2  105.21    4.73
   3  -7   2  111.61    4.35
   3  -7   2  106.77    4.37
  -4   7  -2   59.52    3.38
  -4   7  -2   63.87    2.92
   4  -7   2   56.20    2.89
   4  -7   2   61.99    2.93
  -5   7  -2   37.33    2.65
  -5   7  -2   43.87    2.33
   5  -7   2   39.27    2.30
   5  -7   2   40.69    2.43
  -6   7  -2   51.02    3.20
   6  -7   2   51.22    2.86
   6  -7   2   53.99    2.99
   7  -7   2   40.31    2.60
   7  -7   2   36.86    2.59
   8  -7   2   -0.01    0.46
   8  -7   2    0.07    0.59
   6   6  -2    0.79    0.66
  -6  -6   2    0.20    0.51
   5   6  -2   41.82    2.70
  -5  -6   2   40.39    2.66
   4   6  -2    9.45    1.41
   3   6  -2   15.61    1.60
   2   6  -2   98.53    4.21
  -2  -6   2  101.74    3.85
   1   6  -2   17.22    1.46
   1   6  -2   18.72    1.34
  -1  -6   2   17.56    1.16
   0   6  -2    4.02    0.70
   0   6  -2    4.18    0.81
   0   6  -2    5.32    1.13
   0  -6   2    5.07    0.71
  -1   6  -2   69.09    3.33
  -1   6  -2   61.02    3.13
  -1   6  -2   66.30    2.78
   1  -6   2   71.43    2.83
   1  -6   2   70.34    3.35
  -2   6  -2   86.64    3.27
  -2   6  -2   85.62    3.98
  -2   6  -2   85.41    3.84
   2  -6   2   92.22    3.53
   2  -6   2   84.92    3.46
  -3   6  -2    0.29    0.33
  -3   6  -2    0.08    0.31
  -3   6  -2    0.32    0.38
   3  -6   2    0.20    0.25
   3  -6   2    0.58    0.36
  -4   6  -2   95.50    4.21
  -4   6  -2   98.37    3.85
  -4   6  -2   92.90    4.32
   4  -6   2   94.79    3.92
   4  -6   2   89.96    3.94
  -5   6  -2  107.12    4.77
   5  -6   2  101.05    4.32
   5  -6   2  100.67    4.41
  -6   6  -2   25.12    2.01
   6  -6   2   26.59    1.85
   6  -6   2   23.82    1.90
   7  -6   2    1.19    0.62
   7  -6   2    0.83    0.50
   8  -6   2    0.46    0.50
   8  -6   2    1.77    0.73
   9  -6   2   11.29    1.77
   9  -6   2    9.50    1.70
   7   5  -2   15.49    1.91
  -7  -5   2   22.28    2.43
   6   5  -2   66.54    3.56
  -6  -5   2   62.71    3.47
   5   5  -2    0.97    0.54
   4   5  -2    0.38    0.40
   4   5  -2    0.93    0.51
   3   5  -2  115.86    4.42
   3   5  -2  125.17    4.48
   3   5  -2  121.10    4.82
   3   5  -2  118.83    5.00
  -3  -5   2  114.73    4.36
   2   5  -2  223.61    7.92
   2   5  -2  230.03    8.21
  -2  -5   2  231.84    7.71
  -2  -5   2  223.25    7.51
   1   5  -2   47.54    2.28
   1   5  -2   47.45    2.43
   1   5  -2   52.90    2.59
  -1  -5   2   47.25    2.05
  -1  -5   2   50.73    2.37
   0   5  -2  267.59    9.57
   0   5  -2  268.14    9.21
   0   5  -2  276.95    9.62
   0  -5   2  283.57    9.57
   0  -5   2  306.23    9.72
   0  -5   2  286.43    9.05
  -1   5  -2  302.12   10.97
  -1   5  -2  314.14   10.51
  -1   5  -2  360.30   11.30
   1  -5   2  325.68   11.13
   1  -5   2  332.51   10.59
   1  -5   2  350.86   11.07
  -2   5  -2   64.43    3.04
  -2   5  -2   70.68    3.28
  -2   5  -2   67.57    2.55
   2  -5   2   68.96    2.81
   2  -5   2   71.13    3.12
   2  -5   2   68.04    2.91
  -3   5  -2   54.19    2.34
  -3   5  -2   47.89    2.67
  -3   5  -2   51.26    2.59
  -3   5  -2   52.56    1.95
   3  -5   2   53.84    2.44
   3  -5   2   52.94    2.44
  -4   5  -2    0.16    0.29
  -4   5  -2   -0.01    0.27
   4  -5   2    0.15    0.24
   4  -5   2   -0.05    0.24
  -5   5  -2   11.61    1.44
  -5   5  -2   12.89    1.29
   5  -5   2   11.80    1.39
   5  -5   2   10.74    1.26
  -6   5  -2    6.69    1.16
   6  -5   2    6.12    1.06
   6  -5   2    5.21    0.98
   7  -5   2   10.76    1.45
   7  -5   2   11.81    1.60
   8  -5   2   -0.42    0.54
   8  -5   2   -0.38    0.32
   9  -5   2   36.71    2.66
   9  -5   2   35.44    2.89
   7   4  -2   16.96    1.92
  -7  -4   2   11.72    1.67
   6   4  -2    0.35    0.41
  -6  -4   2    0.58    0.48
   4   4  -2   37.19    1.89
   4   4  -2   34.23    2.07
   4   4  -2   35.84    2.20
  -4  -4   2   38.60    2.29
  -4  -4   2   33.58    1.84
   3   4  -2  157.66    5.31
   3   4  -2  150.46    5.38
   3   4  -2  151.38    5.82
   3   4  -2  156.84    5.69
  -3  -4   2  147.79    5.28
  -3  -4   2  153.53    5.65
   2   4  -2   14.86    1.00
   2   4  -2   16.91    1.11
   2   4  -2   14.49    1.20
   2   4  -2   17.43    1.17
  -2  -4   2   13.63    1.18
  -2  -4   2   14.23    0.95
   1   4  -2  249.25    8.46
   1   4  -2  251.56    8.23
   1   4  -2  251.56    8.35
  -1  -4   2  247.59    8.44
  -1  -4   2  239.24    8.23
   0   4  -2    7.66    0.93
   0   4  -2    8.76    0.84
   0   4  -2    7.57    0.79
   0  -4   2    9.25    0.84
   0  -4   2    8.45    0.81
  -1   4  -2   36.66    1.55
  -1   4  -2   34.00    1.90
  -1   4  -2   35.41    1.85
   1  -4   2   34.45    1.90
   1  -4   2   39.56    1.90
  -2   4  -2  542.27   16.44
  -2   4  -2  517.37   17.02
  -2   4  -2  534.90   16.68
   2  -4   2  528.65   16.97
   2  -4   2  557.50   17.09
   2  -4   2  538.30   16.78
   2  -4   2  545.05   16.80
  -3   4  -2    0.20    0.23
  -3   4  -2    0.23    0.26
  -3   4  -2   -0.01    0.12
   3  -4   2    0.39    0.25
   3  -4   2    0.17    0.25
   3  -4   2    0.20    0.24
  -4   4  -2   -0.15    0.15
  -4   4  -2    0.17    0.25
   4  -4   2   -0.01    0.21
   4  -4   2    0.17    0.28
  -5   4  -2    0.63    0.42
  -5   4  -2    0.36    0.32
   5  -4   2    0.08    0.28
   5  -4   2    0.29    0.31
  -6   4  -2    1.62    0.55
   6  -4   2    1.54    0.55
   6  -4   2    1.02    0.58
   7  -4   2    3.89    0.96
   7  -4   2    3.32    0.81
   8  -4   2   33.52    2.34
   8  -4   2   30.66    2.49
   9  -4   2   29.12    2.34
   9  -4   2   30.79    2.67
   7   3  -2   48.77    2.77
   7   3  -2   50.68    2.90
  -7  -3   2   54.19    2.95
   6   3  -2   87.41    3.82
   6   3  -2   89.37    3.97
  -6  -3   2   84.26    3.91
   5   3  -2   12.93    1.24
   5   3  -2   12.48    1.30
   5   3  -2   12.84    1.34
   5   3  -2   13.99    1.46
  -5  -3   2   11.02    1.39
  -5  -3   2   12.80    1.29
  -5  -3   2   12.72    1.47
   4   3  -2   35.99    1.97
   4   3  -2   35.29    1.77
   4   3  -2   36.55    1.85
   4   3  -2   35.43    2.02
  -4  -3   2   33.92    1.75
  -4  -3   2   35.69    2.08
  -4  -3   2   37.23    2.01
   3   3  -2   92.46    3.78
   3   3  -2  100.47    3.46
   3   3  -2   92.55    3.70
   3   3  -2   97.31    3.54
  -3  -3   2   87.48    3.41
  -3  -3   2   91.46    3.60
  -3  -3   2   94.66    3.84
   2   3  -2  302.14   10.07
   2   3  -2  310.08   10.23
   2   3  -2  318.10    9.94
   2   3  -2  307.60    9.93
  -2  -3   2  316.08   10.24
   1   3  -2  185.71    6.43
   1   3  -2  202.03    6.56
   1   3  -2  194.19    6.62
  -1  -3   2  188.18    6.59
  -1  -3   2  200.56    6.48
   0   3  -2  215.38    6.93
   0   3  -2  207.53    7.20
   0   3  -2  207.23    7.15
   0  -3   2  229.08    7.20
   0  -3   2  215.33    7.17
  -1   3  -2   29.80    1.26
  -1   3  -2   29.25    1.51
  -1   3  -2   31.57    1.63
   1  -3   2   24.80    1.49
   1  -3   2   33.96    1.58
  -2   3  -2    2.21    0.46
  -2   3  -2    3.13    0.36
  -2   3  -2    2.10    0.49
   2  -3   2    3.03    0.51
   2  -3   2    2.70    0.46
   2  -3   2    3.36    0.59
   2  -3   2    3.36    0.62
  -3   3  -2    4.83    0.82
  -3   3  -2    4.95    0.46
  -3   3  -2    3.95    0.70
   3  -3   2    3.26    0.54
   3  -3   2    2.87    0.62
   3  -3   2    4.11    0.69
   3  -3   2    3.55    0.58
  -4   3  -2   20.83    1.41
  -4   3  -2   22.27    1.51
   4  -3   2   22.79    1.38
   4  -3   2   20.72    1.41
  -5   3  -2   33.69    1.87
  -5   3  -2   28.32    1.94
   5  -3   2   32.45    1.86
   5  -3   2   32.32    1.99
  -6   3  -2   43.42    2.24
   6  -3   2   38.89    2.30
   6  -3   2   48.47    2.68
   7  -3   2   19.97    2.15
   7  -3   2   20.30    1.99
   8  -3   2   18.77    2.09
   8  -3   2   18.77    2.26
   9  -3   2    3.29    1.09
   9  -3   2    3.40    0.91
   8   2  -2   13.33    1.62
   7   2  -2    9.15    1.28
  -7  -2   2    7.11    1.39
   6   2  -2   73.62    3.30
   6   2  -2   75.45    3.37
   6   2  -2   74.76    3.35
  -6  -2   2   70.84    3.29
  -6  -2   2   71.78    3.74
   5   2  -2    5.52    0.88
   5   2  -2    4.57    0.79
   5   2  -2    5.11    0.82
   5   2  -2    6.52    0.88
  -5  -2   2    6.36    0.88
  -5  -2   2    5.91    1.02
  -5  -2   2    5.74    0.93
   4   2  -2   33.03    1.63
   4   2  -2   32.17    1.69
   4   2  -2   33.92    1.78
   4   2  -2   32.47    1.78
  -4  -2   2   33.11    1.85
  -4  -2   2   34.34    1.63
  -4  -2   2   34.43    1.93
  -4  -2   2   34.75    1.89
   3   2  -2    0.17    0.20
   3   2  -2    0.65    0.28
  -3  -2   2    0.56    0.29
  -3  -2   2    0.74    0.31
  -3  -2   2    0.54    0.28
   2   2  -2  434.03   13.55
   2   2  -2  433.53   13.69
  -2  -2   2  447.36   13.78
   1   2  -2  102.14    3.56
   1   2  -2   99.80    3.50
   1   2  -2  102.37    3.59
  -1  -2   2  100.83    3.58
  -1   2  -2  725.60   21.54
  -1   2  -2  666.86   21.82
   1  -2   2  771.95   21.89
   1  -2   2  683.87   21.89
  -2   2  -2    8.57    0.52
  -2   2  -2    7.61    0.71
  -2   2  -2    7.36    0.69
   2  -2   2    7.95    0.71
   2  -2   2    9.00    1.00
   2  -2   2    7.14    0.62
   2  -2   2   11.45    1.02
  -3   2  -2   76.70    2.65
  -3   2  -2   73.96    3.15
  -3   2  -2   79.27    3.05
   3  -2   2   68.40    3.05
   3  -2   2   75.53    2.91
   3  -2   2   76.57    3.06
   3  -2   2   73.96    3.30
  -4   2  -2  184.74    5.92
  -4   2  -2  173.09    6.54
  -4   2  -2  182.30    6.28
   4  -2   2  180.85    6.47
   4  -2   2  179.02    6.25
  -5   2  -2    4.91    0.73
  -5   2  -2    4.18    0.81
   5  -2   2    5.02    0.77
   5  -2   2    5.90    0.98
   6  -2   2   43.15    2.56
   6  -2   2   41.39    2.27
   7  -2   2   46.82    2.57
   7  -2   2   41.60    2.73
   8  -2   2    1.80    0.66
   8  -2   2    0.90    0.73
   9   1  -2    0.13    0.51
  -9  -1   2    0.00    0.66
   8   1  -2    3.68    0.92
  -8  -1   2    7.53    1.55
   7   1  -2    9.45    1.26
   7   1  -2    8.35    1.23
  -7  -1   2    8.68    1.52
   6   1  -2    0.95    0.40
   6   1  -2    0.11    0.34
   6   1  -2    0.16    0.27
  -6  -1   2   -0.09    0.30
   5   1  -2    7.26    0.89
   5   1  -2    6.90    0.90
   5   1  -2    8.19    0.92
   5   1  -2    5.89    0.82
  -5  -1   2    8.94    1.24
  -5  -1   2    9.19    1.09
  -5  -1   2    7.46    0.97
   4   1  -2   16.36    1.06
   4   1  -2   14.66    1.02
   4   1  -2   16.03    1.00
  -4  -1   2   15.66    1.07
  -4  -1   2   15.42    1.05
  -4  -1   2   15.74    1.23
   3   1  -2   44.61    1.90
   3   1  -2   47.95    1.94
   3   1  -2   42.99    1.86
  -3  -1   2   45.16    1.90
  -3  -1   2   42.87    1.87
  -3  -1   2   44.63    2.09
   2   1  -2  476.40   14.84
   2   1  -2  491.93   14.88
  -2  -1   2  480.69   14.84
   1   1  -2  794.08   24.02
   0   1  -2   19.22    0.93
   0  -1   2   19.70    0.92
  -2   1  -2   65.34    2.30
  -2   1  -2   62.85    2.60
  -2   1  -2   61.55    2.44
   2  -1   2   62.91    2.49
   2  -1   2   62.93    2.59
   2  -1   2   62.05    2.68
  -3   1  -2   25.99    1.58
  -3   1  -2   25.25    1.55
  -3   1  -2   27.74    1.37
  -3   1  -2   27.98    1.29
   3  -1   2   28.46    1.73
   3  -1   2   28.58    1.36
   3  -1   2   25.45    1.47
   3  -1   2   24.78    1.52
  -4   1  -2   90.20    3.30
  -4   1  -2   90.13    3.33
  -4   1  -2   89.35    3.84
  -4   1  -2   89.56    3.32
   4  -1   2   86.91    3.43
   4  -1   2   88.47    3.69
  -5   1  -2   62.07    3.23
   5  -1   2   67.45    3.18
   5  -1   2   68.14    2.89
   6  -1   2   98.34    4.15
   6  -1   2  104.92    4.55
   7  -1   2   18.97    2.08
   7  -1   2   22.37    1.64
   8  -1   2   25.15    2.62
   9   0  -2   13.39    1.70
  -9   0   2   12.71    2.07
   8   0  -2    0.46    0.46
   8   0  -2    0.40    0.52
  -8   0   2    1.05    0.76
   7   0  -2   72.85    3.45
   7   0  -2   71.56    3.42
  -7   0   2   75.21    4.04
   6   0  -2    7.16    1.01
   6   0  -2    8.44    1.08
  -6   0   2    6.06    1.16
   5   0  -2   26.03    1.48
   5   0  -2   24.70    1.35
   5   0  -2   25.54    1.50
  -5   0   2   26.59    1.49
  -5   0   2   22.41    1.72
  -5   0   2   24.41    1.43
   4   0  -2  159.28    5.51
   4   0  -2  161.74    5.36
   4   0  -2  163.16    5.44
   4   0  -2  153.51    5.36
  -4   0   2  156.98    5.87
  -4   0   2  155.48    5.35
  -4   0   2  163.36    5.41
   3   0  -2   30.08    1.41
   3   0  -2   30.99    1.28
   3   0  -2   29.03    1.32
  -3   0   2   30.87    1.29
  -3   0   2   30.63    1.29
  -3   0   2   31.47    1.26
  -3   0   2   28.57    1.58
   2   0  -2    5.77    0.46
   2   0  -2    5.06    0.33
  -2   0   2    6.13    0.47
  -2   0   2    5.69    0.35
  -2   0   2    5.88    0.36
   1   0  -2  170.83    5.43
   1   0  -2  176.51    5.69
  -1   0   2  181.92    5.44
  -1   0   2  177.43    5.68
   0   0  -2  384.02   12.83
   0   0  -2  402.67   12.78
   0   0  -2  425.13   12.74
   0   0   2  407.53   12.86
   0   0   2  463.67   12.82
  -1   0  -2  255.73    8.08
  -1   0  -2  245.70    8.27
  -1   0  -2  249.59    8.14
  -1   0  -2  265.64    8.29
   1   0   2  271.46    8.29
  -2   0  -2   58.64    2.53
  -2   0  -2   58.94    2.27
  -2   0  -2   62.19    2.30
  -2   0  -2   59.83    2.31
  -2   0  -2   64.18    2.61
   2   0   2   60.96    2.44
   2   0   2   60.90    2.62
   2   0   2   62.35    2.59
   2   0   2   58.89    2.30
  -3   0  -2  758.75   23.60
  -3   0  -2  776.21   23.78
  -3   0  -2  734.57   24.15
  -3   0  -2  802.44   24.31
  -3   0  -2  780.10   23.62
   3   0   2  766.14   24.22
   3   0   2  787.97   24.05
   3   0   2  795.05   23.71
  -4   0  -2   15.60    1.31
  -4   0  -2   14.12    1.02
   4   0   2   14.04    1.17
   4   0   2   15.26    1.03
  -5   0  -2    0.67    0.39
   5   0   2    0.78    0.35
   5   0   2    0.40    0.42
   5   0   2   -0.07    0.14
   6   0   2    4.78    1.01
   7   0   2    0.27    0.49
  -8   0  -2    8.83    1.71
   8   0   2    5.40    1.25
   9  -1  -2   19.05    2.14
  -9   1   2   17.58    2.55
   8  -1  -2   27.25    1.95
   8  -1  -2   25.06    1.96
  -8   1   2   23.09    2.26
   7  -1  -2    1.45    0.57
   7  -1  -2    1.55    0.54
  -7   1   2    1.63    0.70
   6  -1  -2  239.79    8.65
   6  -1  -2  260.97    8.70
  -6   1   2  251.48    9.34
   5  -1  -2  105.94    3.71
   5  -1  -2  104.87    4.06
   5  -1  -2  103.86    3.86
   5  -1  -2  102.25    3.99
  -5   1   2  104.16    3.85
  -5   1   2  108.99    3.90
  -5   1   2  104.96    4.51
   4  -1  -2    2.32    0.43
   4  -1  -2    2.55    0.48
   4  -1  -2    2.82    0.40
   4  -1  -2    3.28    0.45
  -4   1   2    2.63    0.59
  -4   1   2    2.22    0.37
  -4   1   2    2.24    0.40
  -4   1   2    3.49    0.45
   3  -1  -2   19.77    0.85
   3  -1  -2   19.96    0.90
   3  -1  -2   18.71    1.05
  -3   1   2   21.25    1.29
  -3   1   2   20.25    1.05
  -3   1   2   20.27    0.84
  -3   1   2   19.77    0.84
   2  -1  -2   43.10    1.77
  -2   1   2   43.02    1.77
   1  -1  -2    9.47    0.48
   1  -1  -2    9.28    0.64
   1  -1  -2   10.08    0.49
  -1   1   2   10.40    0.49
  -1   1   2    9.05    0.48
  -1   1   2    9.19    0.63
   0  -1  -2  176.29    5.84
   0  -1  -2  174.73    5.73
   0  -1  -2  175.93    5.80
   0  -1  -2  173.89    5.80
   0   1   2  192.35    5.82
   0   1   2  182.05    5.85
  -1  -1  -2  189.68    6.54
  -1  -1  -2  197.18    6.34
  -1  -1  -2  185.06    6.52
  -1  -1  -2  191.14    6.36
   1   1   2  199.09    6.52
   1   1   2  190.95    6.34
   1   1   2  211.71    6.60
   1   1   2  199.88    6.34
  -2  -1  -2   36.56    1.74
  -2  -1  -2   36.31    1.51
  -2  -1  -2   36.06    1.87
  -2  -1  -2   35.47    1.83
  -2  -1  -2   37.36    1.67
   2   1   2   36.08    1.87
   2   1   2   35.75    1.82
   2   1   2   36.30    1.65
   2   1   2   34.02    1.52
   2   1   2   36.83    1.74
   2   1   2   35.10    1.82
  -3  -1  -2  174.19    6.14
  -3  -1  -2  170.75    6.35
  -3  -1  -2  174.35    5.98
   3   1   2  172.61    5.70
   3   1   2  167.89    5.92
   3   1   2  175.42    6.15
  -4  -1  -2   30.58    2.00
  -4  -1  -2   30.86    1.70
  -4  -1  -2   28.47    1.80
   4   1   2   31.08    1.86
   4   1   2   30.78    1.51
   4   1   2   26.66    1.59
  -5  -1  -2   41.53    2.20
  -5  -1  -2   37.99    2.32
   5   1   2   39.67    1.99
   5   1   2   39.64    2.36
  -6  -1  -2    1.15    0.63
   6   1   2    2.86    0.83
  -7  -1  -2    6.28    1.35
   7   1   2    4.24    1.06
  -8  -1  -2    6.73    1.45
   8   1   2    5.54    1.36
   9  -2  -2   34.14    2.49
   9  -2  -2   32.93    2.39
  -9   2   2   36.73    3.09
   8  -2  -2    2.50    0.73
   8  -2  -2    1.09    0.60
  -8   2   2    0.17    0.55
   7  -2  -2  154.41    6.16
   7  -2  -2  163.24    6.20
  -7   2   2  165.22    6.93
   6  -2  -2    3.11    0.66
   6  -2  -2    4.07    0.70
  -6   2   2    3.44    0.56
  -6   2   2    4.01    0.95
   5  -2  -2   48.20    2.28
   5  -2  -2   53.11    2.13
   5  -2  -2   50.35    2.32
  -5   2   2   51.45    2.11
  -5   2   2   47.85    2.67
  -5   2   2   48.38    2.18
  -5   2   2   48.84    2.08
   4  -2  -2   39.34    1.87
   4  -2  -2   38.41    1.61
   4  -2  -2   40.09    1.87
  -4   2   2   40.06    1.62
  -4   2   2   41.24    1.63
  -4   2   2   42.48    1.90
  -4   2   2   43.72    2.23
   3  -2  -2  104.93    3.74
   3  -2  -2  105.91    3.71
   3  -2  -2  109.40    3.42
  -3   2   2  104.46    3.99
  -3   2   2  100.20    3.82
  -3   2   2  106.86    3.42
   2  -2  -2   43.37    1.53
   2  -2  -2   41.65    1.88
  -2   2   2   42.03    1.52
  -2   2   2   42.03    1.86
   1  -2  -2  116.67    3.97
   1  -2  -2  127.66    3.96
   1  -2  -2  121.02    4.00
   1  -2  -2  119.22    4.20
  -1   2   2  115.78    3.95
  -1   2   2  113.17    4.16
   0  -2  -2  447.10   13.89
   0  -2  -2  430.19   13.98
   0  -2  -2  427.15   13.99
   0   2   2  464.59   14.01
   0   2   2  461.08   13.99
   0   2   2  460.37   13.89
  -1  -2  -2   38.89    1.72
  -1  -2  -2   40.41    1.79
  -1  -2  -2   37.84    1.90
  -1  -2  -2   36.19    1.77
  -1  -2  -2   43.16    1.98
   1   2   2   44.33    1.95
   1   2   2   42.15    1.75
   1   2   2   36.97    1.72
   1   2   2   42.45    1.97
   1   2   2   38.34    1.79
  -2  -2  -2   54.03    2.18
  -2  -2  -2   58.63    2.45
  -2  -2  -2   57.57    2.68
  -2  -2  -2   55.90    2.46
  -2  -2  -2   55.11    2.64
   2   2   2   55.09    2.38
   2   2   2   59.60    2.68
   2   2   2   58.71    2.74
   2   2   2   54.81    2.58
   2   2   2   54.29    2.22
   2   2   2   58.80    2.49
  -3  -2  -2    2.41    0.57
  -3  -2  -2    2.12    0.53
  -3  -2  -2    3.59    0.78
   3   2   2    2.25    0.57
   3   2   2    2.37    0.50
   3   2   2    2.71    0.60
  -4  -2  -2   28.17    1.75
  -4  -2  -2   26.88    1.81
   4   2   2   30.41    1.89
   4   2   2   27.60    1.68
  -5  -2  -2    9.71    1.39
  -5  -2  -2   11.05    1.38
   5   2   2   12.82    1.55
   5   2   2    9.98    1.23
  -6  -2  -2    0.99    0.65
  -6  -2  -2    0.79    0.58
   6   2   2    0.42    0.57
   6   2   2    0.26    0.39
  -7  -2  -2   13.10    1.82
   7   2   2   14.89    1.96
   9  -3  -2    8.32    1.44
   9  -3  -2    8.25    1.50
  -9   3   2    8.42    1.72
   8  -3  -2    1.31    0.54
   8  -3  -2    0.35    0.46
  -8   3   2    0.97    0.62
   7  -3  -2   61.48    3.05
   7  -3  -2   63.27    3.12
  -7   3   2   61.12    3.59
  -7   3   2   61.51    2.77
   6  -3  -2  120.32    4.65
   6  -3  -2  116.81    4.62
  -6   3   2  116.77    5.16
  -6   3   2  112.95    4.45
   5  -3  -2    0.28    0.27
   5  -3  -2    0.19    0.19
   5  -3  -2    0.15    0.22
  -5   3   2    0.20    0.31
  -5   3   2    0.21    0.18
  -5   3   2    0.09    0.20
   4  -3  -2  281.10    9.19
   4  -3  -2  283.49    8.82
   4  -3  -2  278.47    9.09
  -4   3   2  283.28    9.32
  -4   3   2  256.01    9.44
  -4   3   2  287.34    8.84
   3  -3  -2    0.49    0.18
   3  -3  -2    0.27    0.24
   3  -3  -2    0.25    0.20
  -3   3   2    0.45    0.27
  -3   3   2    0.45    0.19
  -3   3   2    0.06    0.17
   2  -3  -2  399.88   11.56
   2  -3  -2  390.71   11.71
   2  -3  -2  345.14   12.02
  -2   3   2  373.95   11.67
  -2   3   2  362.21   12.04
   1  -3  -2    8.78    0.71
   1  -3  -2    8.65    0.71
   1  -3  -2   10.33    0.68
   1  -3  -2    9.02    0.81
  -1   3   2    9.79    0.81
  -1   3   2    9.45    0.71
  -1   3   2   10.19    0.66
   0  -3  -2  124.28    4.47
   0  -3  -2  120.64    4.54
   0  -3  -2  124.92    4.59
   0  -3  -2  128.11    4.44
   0  -3  -2  124.34    4.60
   0   3   2  128.48    4.57
   0   3   2  133.63    4.57
   0   3   2  131.91    4.43
   0   3   2  125.15    4.51
  -1  -3  -2    3.93    0.65
  -1  -3  -2    3.10    0.59
  -1  -3  -2    2.49    0.60
  -1  -3  -2    2.17    0.53
  -1  -3  -2    3.40    0.59
   1   3   2    3.21    0.55
   1   3   2    3.92    0.64
   1   3   2    4.69    0.67
   1   3   2    2.88    0.61
  -2  -3  -2    6.70    0.92
  -2  -3  -2    5.42    0.88
  -2  -3  -2    6.61    0.91
  -2  -3  -2    7.34    0.65
   2   3   2    7.69    0.67
   2   3   2    6.44    0.85
   2   3   2    7.61    0.93
   2   3   2    5.20    0.82
  -3  -3  -2    8.41    1.11
  -3  -3  -2    7.97    1.20
  -3  -3  -2   10.46    1.26
   3   3   2    5.89    0.95
   3   3   2   10.63    1.22
   3   3   2    9.90    1.15
  -4  -3  -2   13.73    1.50
  -4  -3  -2   15.64    1.70
   4   3   2   13.76    1.46
   4   3   2   12.48    1.49
  -5  -3  -2   73.43    3.74
  -5  -3  -2   73.30    3.57
   5   3   2   72.58    3.66
   5   3   2   75.73    3.53
  -6  -3  -2   22.29    1.87
  -6  -3  -2   22.75    2.47
   6   3   2   21.43    1.78
   6   3   2   22.68    2.35
  -7  -3  -2   15.48    2.09
   7   3   2   16.10    2.11
  10  -4  -2   29.15    2.48
  10  -4  -2   26.35    2.63
 -10   4   2   24.00    3.11
   9  -4  -2    2.93    0.93
   9  -4  -2    2.63    0.86
  -9   4   2    3.77    1.20
   8  -4  -2   68.00    3.44
   8  -4  -2   70.22    3.56
  -8   4   2   63.98    4.01
   7  -4  -2    1.05    0.46
   7  -4  -2    0.03    0.30
  -7   4   2    0.07    0.34
  -7   4   2   -0.01    0.23
   6  -4  -2   28.97    1.77
   6  -4  -2   28.95    1.81
  -6   4   2   25.28    1.72
  -6   4   2   24.59    1.99
   5  -4  -2  168.97    6.02
   5  -4  -2  178.54    6.32
   5  -4  -2  177.20    6.41
  -5   4   2  184.98    6.61
  -5   4   2  176.80    6.07
  -5   4   2  186.78    6.88
   4  -4  -2   21.13    1.14
   4  -4  -2   22.96    1.32
   4  -4  -2   20.97    1.35
  -4   4   2   22.83    1.53
  -4   4   2   22.32    1.19
  -4   4   2   20.78    1.46
   3  -4  -2   11.22    0.61
   3  -4  -2   11.41    0.79
   3  -4  -2   10.80    0.78
   3  -4  -2   10.29    0.87
  -3   4   2   10.13    0.88
  -3   4   2   10.54    0.97
  -3   4   2   11.20    0.79
   2  -4  -2   47.79    2.20
   2  -4  -2   53.41    2.21
   2  -4  -2   51.43    1.96
   2  -4  -2   46.51    2.39
  -2   4   2   51.73    1.96
  -2   4   2   45.17    2.09
  -2   4   2   47.10    2.35
   1  -4  -2  299.94   10.38
   1  -4  -2  314.39   10.01
   1  -4  -2  305.23   10.17
   1  -4  -2  316.76   10.28
  -1   4   2  332.87   10.01
  -1   4   2  335.01   10.43
  -1   4   2  303.44    9.96
  -1   4   2  297.43   10.16
   0  -4  -2  158.16    5.81
   0  -4  -2  160.15    5.61
   0  -4  -2  159.36    5.78
   0  -4  -2  153.62    5.61
   0  -4  -2  157.69    5.84
   0   4   2  157.08    5.55
   0   4   2  169.49    5.83
   0   4   2  168.62    5.77
  -1  -4  -2    6.77    0.88
  -1  -4  -2    6.65    1.00
  -1  -4  -2    6.59    0.88
  -1  -4  -2    6.71    0.87
   1   4   2    5.71    0.79
   1   4   2    7.10    1.00
   1   4   2    5.76    0.79
   1   4   2    7.33    0.94
  -2  -4  -2   41.47    2.30
  -2  -4  -2   50.06    2.44
  -2  -4  -2   49.51    2.20
  -2  -4  -2   46.20    2.61
   2   4   2   45.63    2.33
   2   4   2   48.05    2.41
   2   4   2   47.37    2.57
  -3  -4  -2    0.80    0.56
  -3  -4  -2    1.59    0.59
   3   4   2    0.79    0.50
   3   4   2    1.00    0.47
  -4  -4  -2  193.24    7.27
  -4  -4  -2  192.31    7.37
   4   4   2  194.63    7.27
   4   4   2  188.01    7.16
  -5  -4  -2   44.43    2.82
  -5  -4  -2   45.12    2.71
   5   4   2   42.45    2.68
   5   4   2   41.64    2.56
  -6  -4  -2    0.95    0.77
  -6  -4  -2    0.12    0.53
   6   4   2    0.96    0.74
   6   4   2    1.09    0.61
  -7  -4  -2    2.82    1.08
   7   4   2    0.89    0.88
  10  -5  -2   32.90    2.58
  10  -5  -2   37.77    2.86
 -10   5   2   30.22    2.99
   9  -5  -2   13.81    1.79
   9  -5  -2   13.15    1.80
  -9   5   2   16.65    2.45
   8  -5  -2   55.41    3.16
   8  -5  -2   53.94    3.06
  -8   5   2   58.23    3.71
   7  -5  -2   -0.13    0.32
   7  -5  -2   -0.07    0.31
  -7   5   2   -0.17    0.28
  -7   5   2    0.40    0.37
   6  -5  -2   23.60    1.59
   6  -5  -2   23.00    1.67
  -6   5   2   22.65    1.89
  -6   5   2   23.06    1.74
   5  -5  -2  128.60    4.79
   5  -5  -2  126.90    4.93
  -5   5   2  121.51    5.16
  -5   5   2  131.55    4.66
  -5   5   2  117.27    5.04
   4  -5  -2   10.05    1.01
   4  -5  -2    9.86    0.82
   4  -5  -2   12.19    1.24
  -4   5   2   10.82    1.04
  -4   5   2   11.13    0.88
  -4   5   2   11.52    1.43
   3  -5  -2   32.64    1.39
   3  -5  -2   31.45    1.55
   3  -5  -2   32.22    1.78
   3  -5  -2   33.76    1.73
  -3   5   2   32.37    1.99
  -3   5   2   32.00    1.71
  -3   5   2   30.40    1.65
   2  -5  -2   20.34    1.56
   2  -5  -2   19.31    1.34
   2  -5  -2   22.35    1.18
   2  -5  -2   23.83    1.44
  -2   5   2   23.50    1.59
  -2   5   2   19.31    1.30
  -2   5   2   23.60    1.19
   1  -5  -2  504.01   16.14
   1  -5  -2  515.15   15.76
   1  -5  -2  481.60   16.24
   1  -5  -2  478.75   15.91
  -1   5   2  478.20   15.97
  -1   5   2  526.65   15.74
  -1   5   2  515.92   16.19
   0  -5  -2   19.34    1.29
   0  -5  -2   20.07    1.37
   0  -5  -2   21.63    1.51
   0  -5  -2   18.77    1.44
   0   5   2   19.74    1.40
   0   5   2   17.73    1.22
   0   5   2   21.70    1.47
  -1  -5  -2    6.08    0.90
  -1  -5  -2    6.30    0.94
  -1  -5  -2    6.44    1.02
   1   5   2    7.33    0.98
   1   5   2    4.78    0.91
  -2  -5  -2  196.13    7.26
  -2  -5  -2  197.97    7.23
   2   5   2  193.61    7.18
   2   5   2  206.71    7.32
  -3  -5  -2  191.65    7.06
  -3  -5  -2  182.59    7.02
   3   5   2  178.03    6.88
   3   5   2  181.18    6.91
  -4  -5  -2    8.70    1.38
  -4  -5  -2    7.70    1.34
   4   5   2    8.79    1.29
   4   5   2   10.54    1.49
  -5  -5  -2   30.19    2.40
  -5  -5  -2   31.07    2.34
   5   5   2   30.47    2.23
   5   5   2   28.61    2.29
  -6  -5  -2    6.85    1.47
  -6  -5  -2    5.49    1.28
   6   5   2    4.75    1.13
   6   5   2    5.59    1.35
   9  -6  -2   38.21    2.61
   9  -6  -2   34.19    2.59
  -9   6   2   33.02    2.92
   8  -6  -2    0.28    0.45
   8  -6  -2    0.87    0.53
  -8   6   2    0.31    0.51
   7  -6  -2    0.45    0.43
   7  -6  -2    0.70    0.45
  -7   6   2   -0.15    0.32
  -7   6   2    0.26    0.37
   6  -6  -2  177.21    6.73
   6  -6  -2  176.25    6.55
  -6   6   2  167.67    6.89
  -6   6   2  182.23    7.14
   5  -6  -2   40.70    2.33
   5  -6  -2   39.31    2.13
  -5   6   2   42.76    2.48
  -5   6   2   43.75    2.59
   4  -6  -2   -0.10    0.20
   4  -6  -2    0.18    0.22
   4  -6  -2   -0.12    0.18
  -4   6   2    0.22    0.26
  -4   6   2   -0.13    0.20
  -4   6   2    0.10    0.19
   3  -6  -2   19.92    1.42
   3  -6  -2   18.56    1.15
   3  -6  -2   21.87    1.47
   3  -6  -2   20.98    1.12
  -3   6   2   19.24    1.61
  -3   6   2   19.14    1.36
  -3   6   2   19.56    1.09
  -3   6   2   19.41    1.27
   2  -6  -2    0.50    0.23
   2  -6  -2   -0.08    0.22
   2  -6  -2    0.44    0.27
  -2   6   2    0.57    0.32
  -2   6   2    0.40    0.40
  -2   6   2    0.35    0.34
  -2   6   2    0.69    0.28
   1  -6  -2   55.41    2.57
   1  -6  -2   55.26    2.71
  -1   6   2   58.58    2.56
  -1   6   2   59.87    2.86
   0  -6  -2  232.12    8.72
   0  -6  -2  243.98    8.42
   0  -6  -2  236.51    8.46
   0   6   2  243.57    8.72
   0   6   2  259.39    8.44
  -1  -6  -2   40.61    2.37
  -1  -6  -2   46.05    2.43
   1   6   2   41.90    2.30
  -2  -6  -2    1.21    0.61
  -2  -6  -2    2.36    0.73
   2   6   2    1.49    0.56
   2   6   2    1.15    0.60
  -3  -6  -2   88.56    4.27
  -3  -6  -2   98.53    4.46
   3   6   2   89.35    4.23
   3   6   2   97.26    4.31
  -4  -6  -2    0.77    0.65
  -4  -6  -2    1.96    0.80
   4   6   2    1.05    0.57
   4   6   2    0.60    0.68
  -5  -6  -2    8.69    1.54
  -5  -6  -2    8.49    1.61
   5   6   2    8.02    1.55
   5   6   2    8.78    1.46
   9  -7  -2    9.33    1.58
   9  -7  -2   10.52    1.66
  -9   7   2    6.71    1.54
   8  -7  -2   80.87    4.27
   8  -7  -2   83.93    4.15
  -8   7   2   90.14    4.83
   7  -7  -2   17.47    1.80
   7  -7  -2   20.64    1.76
  -7   7   2   19.10    2.23
   6  -7  -2   49.80    2.80
   6  -7  -2   48.82    2.59
  -6   7   2   45.03    2.86
  -6   7   2   48.75    2.98
   5  -7  -2    2.77    0.73
   5  -7  -2    3.94    0.76
  -5   7   2    3.02    0.80
   4  -7  -2   94.19    3.70
   4  -7  -2   89.93    4.02
  -4   7   2   89.94    3.92
  -4   7   2   93.48    4.42
  -4   7   2   89.50    3.86
   3  -7  -2    2.00    0.62
   3  -7  -2    2.61    0.51
   3  -7  -2    3.00    0.55
  -3   7   2    2.27    0.65
  -3   7   2    3.27    0.84
  -3   7   2    3.45    0.75
  -3   7   2    3.25    0.56
   2  -7  -2   32.16    2.00
  -2   7   2   29.38    1.97
  -2   7   2   32.50    1.71
   1  -7  -2   85.86    3.61
   1  -7  -2   77.73    3.67
  -1   7   2   84.01    3.89
  -1   7   2   87.08    3.55
   0  -7  -2    0.62    0.40
   0  -7  -2    0.98    0.54
   0   7   2    0.74    0.39
  -1  -7  -2   24.82    1.86
  -1  -7  -2   22.92    1.76
   1   7   2   23.82    1.72
  -2  -7  -2  211.84    7.83
  -2  -7  -2  209.10    7.94
   2   7   2  198.52    7.76
  -3  -7  -2   14.09    1.81
  -3  -7  -2   15.62    1.96
   3   7   2   15.42    1.85
  -4  -7  -2   37.68    2.67
  -4  -7  -2   31.00    2.51
   4   7   2   33.25    2.46
   4   7   2   35.51    2.61
  -5  -7  -2    1.54    0.96
  -5  -7  -2    2.05    0.87
   5   7   2    3.79    1.01
   5   7   2    2.70    1.05
   9  -8  -2   49.95    3.13
   9  -8  -2   46.84    3.21
  -9   8   2   45.99    3.55
   8  -8  -2    0.32    0.57
   8  -8  -2    0.33    0.46
  -8   8   2    0.53    0.59
   7  -8  -2   51.39    3.10
   7  -8  -2   52.85    2.94
  -7   8   2   55.75    3.42
   6  -8  -2   22.01    1.65
   6  -8  -2   20.28    1.78
  -6   8   2   24.45    1.99
  -6   8   2   19.38    1.92
   5  -8  -2  150.80    6.14
   5  -8  -2  151.38    5.74
   4  -8  -2   19.82    1.64
   4  -8  -2   20.86    1.41
  -4   8   2   22.35    1.66
  -4   8   2   22.18    1.69
   3  -8  -2    2.87    0.74
  -3   8   2    4.75    0.95
  -3   8   2    3.51    0.82
   2  -8  -2    0.98    0.62
   2  -8  -2    0.67    0.36
  -2   8   2    1.68    0.50
   1  -8  -2  128.84    5.24
   1  -8  -2  132.39    5.47
  -1   8   2  137.83    5.24
   0  -8  -2   49.95    2.85
   0  -8  -2   44.82    2.66
   0   8   2   51.84    2.72
  -1  -8  -2   13.66    1.69
  -1  -8  -2   12.86    1.62
   1   8   2   11.53    1.46
  -2  -8  -2    0.60    0.59
  -2  -8  -2    0.62    0.62
   2   8   2   -0.34    0.29
  -3  -8  -2    5.55    1.27
  -3  -8  -2    4.83    1.23
   3   8   2    4.91    1.18
  -4  -8  -2   14.92    2.04
  -4  -8  -2   15.48    2.15
   4   8   2   16.33    2.09
   9  -9  -2    9.53    1.71
   9  -9  -2   12.06    1.77
  -9   9   2    9.53    1.82
   8  -9  -2    4.51    1.12
   8  -9  -2    7.45    1.39
  -8   9   2    6.83    1.47
   7  -9  -2    8.44    1.29
   7  -9  -2    8.12    1.43
  -7   9   2    8.32    1.46
   6  -9  -2   44.17    2.49
   6  -9  -2   39.04    2.67
  -6   9   2   38.68    3.43
   5  -9  -2   35.14    2.13
   5  -9  -2   37.16    2.49
  -5   9   2   39.10    2.43
   4  -9  -2   33.59    2.30
  -4   9   2   31.13    2.14
   3  -9  -2   10.89    1.47
   2  -9  -2   87.90    4.06
   2  -9  -2   79.62    3.64
  -2   9   2   80.06    3.58
   1  -9  -2    6.93    1.21
   1  -9  -2    6.72    1.16
  -1   9   2    6.45    1.08
   0  -9  -2   76.60    3.85
   0  -9  -2   74.36    3.86
   0   9   2   80.85    3.82
  -1  -9  -2   15.84    1.96
  -1  -9  -2   12.23    1.74
   1   9   2   11.62    1.60
  -2  -9  -2    0.71    0.65
  -2  -9  -2   -0.28    0.55
   2   9   2    0.86    0.60
  -3  -9  -2   55.61    3.57
  -3  -9  -2   53.84    3.51
   3   9   2   51.06    3.33
   8 -10  -2   -0.16    0.56
   8 -10  -2   -0.06    0.48
   7 -10  -2    1.66    0.74
   7 -10  -2    3.54    0.94
   6 -10  -2    9.38    1.34
   6 -10  -2    6.78    1.30
   5 -10  -2  103.81    4.95
   4 -10  -2    1.13    0.64
   3 -10  -2    2.95    0.92
   2 -10  -2    3.15    0.88
   2 -10  -2    2.53    0.74
  -2  10   2    4.12    0.90
   1 -10  -2    4.45    1.09
   1 -10  -2    3.96    0.96
  -1  10   2    6.66    1.19
   0 -10  -2   32.02    2.35
   0 -10  -2   29.63    2.37
   0  10   2   30.59    2.25
  -1 -10  -2    7.98    1.42
  -1 -10  -2    5.39    1.25
   1  10   2    5.28    1.17
  -2 -10  -2   41.08    3.06
  -2 -10  -2   38.59    2.97
   2  10   2   45.39    3.03
   7 -11  -2   29.97    2.26
   7 -11  -2   31.39    2.65
   6 -11  -2   15.28    2.15
   5 -11  -2    0.77    0.64
   4 -11  -2   10.83    1.68
   3 -11  -2    0.21    0.54
   2 -11  -2   10.97    1.68
   1 -11  -2    6.31    1.25
   1 -11  -2    6.98    1.43
  -1  11   2    5.32    1.11
   0 -11  -2   50.08    3.28
   0 -11  -2   43.31    3.04
   0  11   2   48.74    3.05
  -1 -11  -2   33.31    2.75
  -1 -11  -2   38.06    2.92
   1  11   2   30.11    2.55
   6 -12  -2   26.53    2.84
   5 -12  -2   25.94    2.84
   4 -12  -2    0.60    0.64
   3 -12  -2    0.87    0.71
   2 -12  -2   26.90    2.80
   1 -12  -2   51.63    3.41
   1 -12  -2   47.44    3.15
  -1  12   2   47.39    3.05
   1  12  -3    8.30    1.53
  -1 -12   3    8.45    1.65
   0  12  -3   12.31    1.76
   0 -12   3   16.41    2.18
   3 -12   3   15.05    1.86
   4 -12   3   73.29    3.88
   4 -12   3   74.71    4.01
   5 -12   3   19.52    2.25
   5 -12   3   20.16    2.35
   2  11  -3    0.98    0.77
  -2 -11   3    1.23    0.79
   1  11  -3   34.76    2.61
   0  11  -3    4.00    0.99
  -1  11  -3   40.75    2.63
   2 -11   3   55.95    3.08
   3 -11   3   70.04    3.58
   3 -11   3   70.42    3.65
   4 -11   3   10.95    1.53
   4 -11   3    8.50    1.40
   5 -11   3    4.80    1.21
   5 -11   3    2.77    0.90
   6 -11   3    6.88    1.34
   6 -11   3    6.78    1.42
   3  10  -3    4.51    1.12
   2  10  -3    4.00    1.06
   1  10  -3    4.03    1.05
   0  10  -3  155.39    6.41
  -1  10  -3   41.33    2.52
   1 -10   3   44.16    2.54
   2 -10   3   19.40    1.93
   2 -10   3   17.62    1.52
   3 -10   3   32.30    2.15
   3 -10   3   28.05    2.02
   4 -10   3   40.97    2.56
   4 -10   3   38.52    2.51
   5 -10   3    0.18    0.48
   5 -10   3    0.07    0.42
   6 -10   3    1.88    0.78
   6 -10   3    1.73    0.79
   7 -10   3   57.01    3.65
   7 -10   3   65.86    3.69
   4   9  -3    2.27    0.89
   3   9  -3   50.56    3.22
   2   9  -3   22.95    2.31
   1   9  -3    0.42    0.56
   0   9  -3   95.18    4.29
  -1   9  -3   12.01    1.43
   1  -9   3   12.69    1.37
   2  -9   3   55.64    2.84
   2  -9   3   54.44    2.78
   3  -9   3   12.49    1.46
   3  -9   3   13.93    1.56
   4  -9   3   15.95    1.77
   4  -9   3   14.32    1.65
   5  -9   3   65.20    3.47
   5  -9   3   62.44    3.32
   6  -9   3   23.74    2.03
   6  -9   3   25.92    2.49
   7  -9   3    1.87    0.81
   7  -9   3    2.02    0.86
   5   8  -3    0.09    0.54
  -5  -8   3    0.56    0.71
   4   8  -3   35.69    2.61
   3   8  -3    9.78    1.50
   2   8  -3    3.25    0.87
   1   8  -3  115.21    4.89
   0   8  -3   30.83    2.02
   0  -8   3   34.79    2.16
  -1   8  -3    4.05    0.80
   1  -8   3    4.05    0.74
  -2   8  -3   52.12    2.50
   2  -8   3   54.42    2.71
   2  -8   3   54.00    2.65
   3  -8   3    0.46    0.41
   3  -8   3    1.25    0.53
   4  -8   3   37.54    2.31
   4  -8   3   39.17    2.34
  -5   8  -3   70.14    4.04
   5  -8   3   65.44    3.37
   5  -8   3   71.03    3.55
   6  -8   3    5.23    1.15
   6  -8   3    8.08    1.35
   7  -8   3    0.37    0.54
   7  -8   3   -0.23    0.40
   8  -8   3    3.42    1.07
   8  -8   3    4.19    1.27
   6   7  -3    1.77    0.75
  -6  -7   3    2.47    0.94
   5   7  -3    0.34    0.56
   4   7  -3   23.38    1.97
   3   7  -3   40.58    2.52
   2   7  -3    0.85    0.49
   1   7  -3    4.82    0.91
   0   7  -3    0.11    0.30
   0  -7   3   -0.21    0.20
  -1   7  -3   92.47    3.75
   1  -7   3   91.30    3.64
  -2   7  -3   16.32    2.06
  -2   7  -3   16.47    1.17
   2  -7   3   17.65    1.33
   2  -7   3   17.30    1.33
   2  -7   3   20.38    1.37
  -3   7  -3   76.88    3.95
   3  -7   3   75.57    3.35
   3  -7   3   73.96    3.34
  -4   7  -3  192.29    7.80
   4  -7   3  192.97    7.20
   4  -7   3  197.74    7.20
  -5   7  -3    0.06    0.34
  -5   7  -3    0.85    0.55
   5  -7   3    0.05    0.36
   5  -7   3    1.09    0.50
   6  -7   3   25.98    2.03
   6  -7   3   25.35    1.94
   7  -7   3   20.69    2.28
   7  -7   3   14.66    1.85
   8  -7   3   15.13    2.04
   8  -7   3   15.91    2.00
   7   6  -3    9.20    1.58
  -7  -6   3   10.86    1.70
   6   6  -3   10.79    1.61
  -6  -6   3   10.66    1.69
   5   6  -3  109.88    5.05
   3   6  -3   42.63    2.48
   2   6  -3  132.47    5.66
   2   6  -3  137.54    5.35
   1   6  -3    2.42    0.62
   1   6  -3    3.33    0.67
  -1  -6   3    4.47    0.61
   0   6  -3    3.56    0.83
   0   6  -3    3.82    0.67
   0  -6   3    5.46    0.68
  -1   6  -3   55.78    2.89
  -1   6  -3   60.06    3.08
  -1   6  -3   52.86    2.42
   1  -6   3   57.34    2.42
   1  -6   3   52.73    2.42
  -2   6  -3  171.53    6.79
  -2   6  -3  201.04    7.24
  -2   6  -3  183.40    6.16
   2  -6   3  170.03    6.39
   2  -6   3  175.89    6.52
   2  -6   3  187.63    6.39
  -3   6  -3   28.72    1.98
   3  -6   3   26.12    1.65
   3  -6   3   30.58    1.76
   3  -6   3   28.73    1.91
  -4   6  -3  126.93    5.51
  -4   6  -3  129.05    4.85
   4  -6   3  125.72    5.01
   4  -6   3  129.63    5.10
  -5   6  -3   11.31    1.26
  -5   6  -3   12.86    1.83
   5  -6   3   10.47    1.31
   5  -6   3    8.72    1.27
   6  -6   3   26.87    1.96
   6  -6   3   31.83    2.22
   7  -6   3    3.36    0.92
   7  -6   3    5.58    1.10
   8  -6   3   17.10    2.06
   8  -6   3   19.28    2.28
   7   5  -3    0.52    0.57
  -7  -5   3    1.62    0.73
   6   5  -3   18.88    2.02
   5   5  -3   58.63    3.10
   5   5  -3   48.12    2.66
   4   5  -3   15.67    1.26
   4   5  -3   14.37    1.60
   3   5  -3   36.30    2.24
   3   5  -3   34.52    2.12
   3   5  -3   38.20    1.98
   2   5  -3   23.20    1.54
   2   5  -3   23.15    1.67
   1   5  -3  122.15    4.80
   1   5  -3  121.92    4.86
   1   5  -3  117.73    4.53
  -1  -5   3  119.72    4.65
   0   5  -3  227.34    8.06
   0   5  -3  220.31    7.57
   0   5  -3  216.50    7.94
   0  -5   3  237.69    8.02
  -1   5  -3  220.26    7.53
  -1   5  -3  229.51    8.21
  -1   5  -3  214.54    8.01
   1  -5   3  243.08    8.21
   1  -5   3  242.57    7.57
   1  -5   3  222.39    7.69
  -2   5  -3    7.18    1.03
  -2   5  -3    5.76    0.92
  -2   5  -3    7.71    0.64
   2  -5   3    6.34    0.91
   2  -5   3    5.37    0.79
   2  -5   3    6.26    0.81
  -3   5  -3  110.16    4.72
  -3   5  -3  108.11    4.55
  -3   5  -3  111.43    4.10
  -3   5  -3  114.14    3.82
   3  -5   3  106.09    4.24
   3  -5   3  103.86    4.20
   3  -5   3  110.02    4.58
  -4   5  -3   51.73    2.76
  -4   5  -3   48.10    2.25
  -4   5  -3   48.43    2.78
   4  -5   3   48.93    2.52
   4  -5   3   47.58    2.44
  -5   5  -3   50.99    2.91
   5  -5   3   52.93    2.81
   5  -5   3   54.35    2.73
   6  -5   3   20.71    1.78
   6  -5   3   23.06    1.74
   7  -5   3    1.47    0.66
   7  -5   3    0.73    0.59
   8  -5   3    5.15    1.29
   8  -5   3    3.34    1.00
   7   4  -3   10.48    1.54
   7   4  -3    9.95    1.50
  -7  -4   3    9.79    1.44
   6   4  -3    4.39    0.97
   6   4  -3    4.92    0.97
   5   4  -3   22.75    1.65
   5   4  -3   18.27    1.54
   4   4  -3    0.29    0.37
   4   4  -3    0.10    0.27
   4   4  -3   -0.35    0.37
  -4  -4   3    0.29    0.30
   3   4  -3    0.66    0.37
   3   4  -3    0.51    0.36
   3   4  -3    0.68    0.35
  -3  -4   3    0.86    0.34
   2   4  -3   41.27    2.01
   2   4  -3   40.15    1.90
   2   4  -3   39.12    2.00
   2   4  -3   38.00    2.09
  -2  -4   3   37.44    2.08
   1   4  -3  335.40   11.05
   1   4  -3  331.02   10.77
   1   4  -3  328.40   11.00
  -1  -4   3  330.25   10.88
  -1  -4   3  340.92   11.01
   0   4  -3  279.71    9.15
   0   4  -3  283.37    9.59
   0   4  -3  264.29    9.44
   0  -4   3  296.46    9.47
   0  -4   3  291.69    9.52
  -1   4  -3  383.75   13.52
  -1   4  -3  405.46   12.97
  -1   4  -3  397.53   13.41
   1  -4   3  410.08   13.26
   1  -4   3  434.05   13.58
   1  -4   3  448.26   13.01
   1  -4   3  421.85   13.41
  -2   4  -3  190.04    6.80
  -2   4  -3  190.16    6.18
   2  -4   3  185.89    6.73
   2  -4   3  189.92    6.49
   2  -4   3  188.12    6.45
   2  -4   3  193.54    6.75
  -3   4  -3    2.81    0.64
  -3   4  -3    4.88    0.67
  -3   4  -3    3.79    0.73
  -3   4  -3    4.44    0.53
   3  -4   3    3.88    0.79
   3  -4   3    4.93    0.76
   3  -4   3    2.73    0.55
  -4   4  -3    4.44    0.87
  -4   4  -3    2.85    0.75
   4  -4   3    2.75    0.62
   4  -4   3    2.90    0.60
  -5   4  -3    9.08    1.30
   5  -4   3    8.70    1.15
   5  -4   3   10.38    1.34
  -6   4  -3    7.63    1.17
   6  -4   3    8.45    1.33
   6  -4   3    6.66    1.04
   7  -4   3    3.01    0.92
   7  -4   3    2.37    0.71
   8  -4   3   41.25    2.96
   8  -4   3   42.04    2.69
   8   3  -3   -0.28    0.45
   7   3  -3    4.73    1.03
   7   3  -3    1.91    0.68
   6   3  -3   19.39    1.51
   6   3  -3   15.14    1.67
  -6  -3   3   14.73    1.76
   5   3  -3    1.24    0.50
   5   3  -3    2.58    0.67
   5   3  -3    1.41    0.53
  -5  -3   3    1.83    0.60
  -5  -3   3    1.23    0.50
   4   3  -3  176.25    6.35
   4   3  -3  182.91    6.52
  -4  -3   3  181.17    6.59
  -4  -3   3  182.48    6.60
   3   3  -3    0.10    0.15
   3   3  -3    0.34    0.27
   3   3  -3    0.49    0.30
   3   3  -3   -0.01    0.19
  -3  -3   3    0.79    0.37
  -3  -3   3    0.12    0.25
   2   3  -3   26.78    1.53
   2   3  -3   27.89    1.46
   2   3  -3   27.17    1.44
   2   3  -3   25.76    1.43
  -2  -3   3   27.27    1.53
   1   3  -3   71.65    2.95
   1   3  -3   71.67    2.82
   1   3  -3   78.57    3.02
  -1  -3   3   71.59    2.95
   0   3  -3  527.64   16.39
   0   3  -3  493.78   16.26
   0   3  -3  491.04   15.98
   0  -3   3  533.46   16.35
   0  -3   3  542.23   16.29
  -1   3  -3  621.20   20.38
  -1   3  -3  656.94   20.00
  -1   3  -3  668.94   20.57
   1  -3   3  658.94   20.70
   1  -3   3  689.86   20.43
   1  -3   3  627.76   20.43
  -2   3  -3   34.54    1.47
  -2   3  -3   34.38    1.86
  -2   3  -3   35.78    1.93
   2  -3   3   36.53    1.88
   2  -3   3   31.48    1.62
   2  -3   3   34.22    1.66
   2  -3   3   33.87    1.89
  -3   3  -3    0.56    0.33
  -3   3  -3    0.41    0.20
  -3   3  -3    0.48    0.31
   3  -3   3    1.71    0.55
   3  -3   3    0.76    0.36
   3  -3   3    0.35    0.25
  -4   3  -3  152.30    5.60
  -4   3  -3  138.41    5.62
   4  -3   3  144.06    5.53
   4  -3   3  148.44    5.37
  -5   3  -3   27.01    1.73
   5  -3   3   25.71    1.67
  -6   3  -3    1.53    0.54
   6  -3   3    1.18    0.62
   6  -3   3    1.03    0.43
   7  -3   3    3.85    0.91
   7  -3   3    5.15    1.20
   8  -3   3    1.09    0.62
   8  -3   3    0.78    0.68
   9   2  -3   35.45    2.56
   8   2  -3    6.74    1.18
  -8  -2   3    4.92    1.27
   7   2  -3    5.15    0.96
  -7  -2   3    3.56    0.97
   6   2  -3   24.47    1.69
   6   2  -3   23.55    1.66
  -6  -2   3   22.80    1.87
   5   2  -3   60.52    2.74
   5   2  -3   56.07    2.76
   5   2  -3   55.75    2.67
   5   2  -3   55.39    2.65
  -5  -2   3   59.16    2.75
  -5  -2   3   54.98    2.92
   4   2  -3  105.04    4.00
   4   2  -3  107.05    4.07
   4   2  -3  101.68    4.00
   4   2  -3  104.64    3.94
  -4  -2   3  103.64    3.89
  -4  -2   3  103.64    4.24
  -4  -2   3  105.96    4.08
  -4  -2   3  106.25    4.05
   3   2  -3   15.99    0.93
   3   2  -3   15.07    1.01
   3   2  -3   14.86    1.00
   3   2  -3   14.93    1.02
  -3  -2   3   14.70    1.09
  -3  -2   3   15.26    1.03
   2   2  -3   89.14    3.28
   2   2  -3   89.24    3.29
   2   2  -3   92.28    3.25
   2   2  -3   85.75    3.26
  -2  -2   3   84.33    3.24
   1   2  -3  148.79    5.20
   1   2  -3  154.22    5.14
   1   2  -3  157.17    5.07
  -1  -2   3  143.81    5.07
   0   2  -3    8.86    0.63
   0   2  -3   10.34    0.82
   0   2  -3    9.58    0.75
   0  -2   3   10.11    0.75
  -1   2  -3   53.86    2.39
  -1   2  -3   53.57    2.44
  -1   2  -3   57.92    2.16
   1  -2   3   64.57    2.49
  -2   2  -3   42.91    2.15
  -2   2  -3   47.31    1.88
  -2   2  -3   47.63    2.25
  -2   2  -3   45.99    1.74
   2  -2   3   44.54    2.05
   2  -2   3   53.81    2.06
   2  -2   3   51.53    2.29
   2  -2   3   47.18    2.32
  -3   2  -3  656.59   20.08
  -3   2  -3  636.95   20.72
  -3   2  -3  652.98   20.53
   3  -2   3  653.55   20.51
   3  -2   3  665.23   20.30
   3  -2   3  656.97   20.91
  -4   2  -3   27.69    1.60
  -4   2  -3   27.48    1.37
  -4   2  -3   24.86    1.76
   4  -2   3   24.33    1.63
   4  -2   3   23.16    1.44
  -5   2  -3    6.80    0.93
   5  -2   3    6.92    1.07
   5  -2   3    7.52    1.01
  -6   2  -3   27.16    1.60
   6  -2   3   26.52    2.02
   6  -2   3   26.58    1.77
   7  -2   3    6.45    1.12
   7  -2   3    6.97    1.28
   8  -2   3   17.06    2.23
   9   1  -3   -0.11    0.47
  -9  -1   3   -0.06    0.59
   8   1  -3   38.68    2.52
  -8  -1   3   44.89    3.16
   7   1  -3    2.28    0.65
  -7  -1   3    0.93    0.58
   6   1  -3    2.38    0.60
   6   1  -3    3.36    0.77
   6   1  -3    2.95    0.64
  -6  -1   3    2.33    0.75
   5   1  -3  215.64    7.41
   5   1  -3  212.98    7.32
   5   1  -3  207.73    7.53
  -5  -1   3  230.63    7.55
  -5  -1   3  224.91    8.04
  -5  -1   3  220.65    7.48
   4   1  -3   39.25    1.79
   4   1  -3   39.13    1.91
   4   1  -3   41.67    1.89
  -4  -1   3   38.90    1.83
  -4  -1   3   40.48    2.16
  -4  -1   3   40.75    1.85
   3   1  -3  195.46    6.49
   3   1  -3  186.60    6.43
   3   1  -3  195.68    6.34
  -3  -1   3  197.47    6.36
  -3  -1   3  196.24    6.75
   2   1  -3   -0.26    0.12
   2   1  -3   -0.27    0.10
  -2  -1   3   -0.14    0.13
   1   1  -3   57.08    2.16
   1   1  -3   60.34    2.21
   1   1  -3   58.44    2.33
  -1  -1   3   58.98    2.17
   0   1  -3  737.73   23.09
   0   1  -3  713.77   22.96
   0  -1   3  818.03   23.14
  -1   1  -3  473.56   15.73
  -1   1  -3  468.07   15.75
  -1   1  -3  524.46   15.51
   1  -1   3  547.45   15.82
  -2   1  -3   65.45    2.87
  -2   1  -3   64.87    2.54
  -2   1  -3   65.48    2.74
   2  -1   3   70.87    2.76
   2  -1   3   71.87    2.93
   2  -1   3   67.12    2.95
  -3   1  -3    6.53    0.75
  -3   1  -3    5.22    0.84
  -3   1  -3    5.85    0.77
  -3   1  -3    5.33    0.72
   3  -1   3    5.32    0.67
   3  -1   3    5.76    0.86
   3  -1   3    7.88    1.09
  -4   1  -3   86.74    3.95
  -4   1  -3   90.31    3.41
  -4   1  -3   90.39    3.47
  -4   1  -3   87.59    3.43
   4  -1   3   85.17    3.74
   4  -1   3   86.59    3.45
  -5   1  -3    1.89    0.45
   5  -1   3    1.67    0.57
   5  -1   3    1.32    0.44
   6  -1   3    0.28    0.34
   6  -1   3    0.28    0.42
   7  -1   3    9.78    1.51
   8  -1   3   34.39    2.76
   9   0  -3   58.24    3.38
  -9   0   3   61.33    4.09
   8   0  -3   22.86    1.86
  -8   0   3   25.62    2.37
   7   0  -3   11.83    1.39
   7   0  -3   11.40    1.37
  -7   0   3   11.00    1.68
   6   0  -3   30.88    1.69
   6   0  -3   33.21    1.92
   6   0  -3   30.13    1.75
  -6   0   3   30.67    2.21
   5   0  -3    8.53    0.88
   5   0  -3    8.42    0.91
   5   0  -3    6.04    0.84
  -5   0   3    8.12    1.17
  -5   0   3    7.79    0.69
  -5   0   3    7.00    0.67
   4   0  -3   56.01    2.13
   4   0  -3   59.72    2.31
   4   0  -3   55.51    2.35
   4   0  -3   56.43    2.43
  -4   0   3   59.86    2.23
  -4   0   3   53.33    2.13
  -4   0   3   53.91    2.66
  -4   0   3   56.86    2.17
   3   0  -3    1.15    0.30
   3   0  -3    1.97    0.26
  -3   0   3    2.02    0.26
  -3   0   3    1.41    0.41
  -3   0   3    1.96    0.38
  -3   0   3    1.70    0.24
   2   0  -3   -0.03    0.07
   2   0  -3    0.10    0.15
  -2   0   3    0.01    0.11
  -2   0   3    0.01    0.08
   1   0  -3 1000.00   30.23
  -1   0  -3   49.72    2.21
  -1   0  -3   50.70    2.21
  -1   0  -3   50.43    2.03
  -1   0  -3   49.55    2.13
   1   0   3   56.41    2.25
   1   0   3   48.29    2.07
  -2   0  -3  117.07    4.49
  -2   0  -3  115.59    4.24
  -2   0  -3  116.49    4.15
  -2   0  -3  121.85    4.24
  -2   0  -3  111.46    4.44
   2   0   3  117.87    4.52
   2   0   3  124.16    4.54
   2   0   3  116.20    4.30
  -3   0  -3   78.27    3.01
  -3   0  -3   76.39    3.43
  -3   0  -3   76.45    3.00
  -3   0  -3   75.60    3.05
   3   0   3   76.38    2.90
   3   0   3   76.34    3.25
   3   0   3   78.85    3.53
  -4   0  -3    1.52    0.40
  -4   0  -3    1.10    0.51
  -4   0  -3    1.55    0.45
  -4   0  -3    1.18    0.34
   4   0   3    0.80    0.41
   4   0   3    1.19    0.39
  -5   0  -3    0.92    0.43
   5   0   3    0.29    0.29
   5   0   3    0.40    0.39
   6   0   3    0.86    0.58
  -7   0  -3    7.59    1.41
   7   0   3    8.17    1.50
  -8   0  -3   46.57    3.23
   8   0   3   40.24    3.07
   9  -1  -3    1.44    0.70
  -9   1   3    0.47    0.72
   8  -1  -3  101.92    4.53
   8  -1  -3   96.28    4.41
  -8   1   3   97.74    5.14
   7  -1  -3   40.31    2.33
   7  -1  -3   38.92    2.26
  -7   1   3   43.90    2.89
   6  -1  -3   20.72    1.47
   6  -1  -3   24.80    1.51
  -6   1   3   18.22    1.71
   5  -1  -3    1.10    0.36
   5  -1  -3    1.14    0.41
   5  -1  -3    0.98    0.30
  -5   1   3    0.84    0.25
  -5   1   3    1.07    0.33
  -5   1   3    0.94    0.50
  -5   1   3    1.18    0.28
   4  -1  -3  399.67   12.36
   4  -1  -3  392.39   12.21
   4  -1  -3  395.58   12.51
  -4   1   3  392.84   11.99
  -4   1   3  384.15   11.97
  -4   1   3  384.87   12.43
  -4   1   3  396.92   12.93
   3  -1  -3    0.94    0.29
   3  -1  -3    1.31    0.27
  -3   1   3    1.29    0.33
  -3   1   3    1.07    0.37
   2  -1  -3   44.63    1.44
   2  -1  -3   43.74    1.44
   2  -1  -3   42.02    1.93
  -2   1   3   45.67    1.96
   1  -1  -3  444.45   13.56
   1  -1  -3  430.03   13.82
   1  -1  -3  447.57   13.50
   1  -1  -3  435.94   13.48
  -1   1   3  439.41   13.49
   0  -1  -3  904.87   28.07
   0  -1  -3  892.17   27.88
   0  -1  -3  886.82   27.98
   0  -1  -3  896.15   27.98
   0   1   3  931.66   28.00
   0   1   3  932.30   28.07
   0   1   3  980.71   27.99
  -1  -1  -3  127.99    4.56
  -1  -1  -3  128.56    4.57
  -1  -1  -3  128.37    4.72
  -1  -1  -3  129.31    4.51
  -1  -1  -3  128.05    4.72
   1   1   3  134.71    4.74
   1   1   3  123.77    4.55
   1   1   3  136.20    4.59
  -2  -1  -3    6.51    0.62
  -2  -1  -3    5.00    0.72
  -2  -1  -3    6.43    0.91
  -2  -1  -3    5.42    0.85
  -2  -1  -3    5.91    0.76
   2   1   3    6.60    0.88
   2   1   3    7.68    0.90
   2   1   3    7.11    0.82
   2   1   3    6.19    0.91
   2   1   3    5.30    0.68
  -3  -1  -3    7.01    1.03
  -3  -1  -3    8.29    0.70
  -3  -1  -3   10.37    1.19
  -3  -1  -3    8.47    0.68
  -3  -1  -3    8.54    0.97
   3   1   3    8.84    1.19
   3   1   3    9.05    1.06
   3   1   3    8.57    0.64
   3   1   3    7.50    0.90
  -4  -1  -3    0.07    0.52
  -4  -1  -3    1.05    0.46
   4   1   3    1.96    0.52
   4   1   3    0.58    0.43
  -5  -1  -3   44.80    2.67
  -5  -1  -3   43.82    2.39
   5   1   3   42.39    2.58
   5   1   3   44.14    2.35
  -6  -1  -3    0.22    0.52
   6   1   3   -0.05    0.49
  -7  -1  -3    4.94    1.32
   7   1   3    6.12    1.39
   9  -2  -3   73.59    3.86
  -9   2   3   73.62    4.55
   8  -2  -3   11.74    1.53
   8  -2  -3   13.82    1.72
  -8   2   3    8.34    1.53
   7  -2  -3  105.08    4.44
   7  -2  -3  100.02    4.32
  -7   2   3  105.04    5.04
   6  -2  -3   53.05    2.63
   6  -2  -3   55.19    2.58
  -6   2   3   58.45    3.17
  -6   2   3   51.89    2.40
   5  -2  -3   38.12    1.94
   5  -2  -3   39.57    1.63
   5  -2  -3   38.94    2.00
   5  -2  -3   42.31    1.72
  -5   2   3   41.08    2.38
  -5   2   3   38.72    1.59
  -5   2   3   42.90    2.01
   4  -2  -3  154.28    5.28
   4  -2  -3  153.76    4.96
   4  -2  -3  153.30    5.32
  -4   2   3  151.03    4.73
  -4   2   3  153.99    4.75
  -4   2   3  154.73    5.44
  -4   2   3  143.62    5.65
   3  -2  -3  426.05   13.40
   3  -2  -3  434.62   13.61
   3  -2  -3  434.26   13.65
  -3   2   3  461.62   13.95
  -3   2   3  426.34   13.96
   2  -2  -3   18.02    1.14
   2  -2  -3   17.04    0.79
  -2   2   3   17.17    0.78
   1  -2  -3  195.48    6.21
   1  -2  -3  195.71    6.23
   1  -2  -3  184.88    6.47
   1  -2  -3  187.54    6.21
  -1   2   3  201.07    6.22
  -1   2   3  176.29    6.43
   0  -2  -3   34.43    1.72
   0  -2  -3   34.01    1.61
   0  -2  -3   33.26    1.65
   0  -2  -3   37.37    1.75
   0  -2  -3   36.20    1.76
   0   2   3   32.00    1.35
   0   2   3   38.63    1.78
   0   2   3   39.88    1.79
   0   2   3   38.61    1.74
   0   2   3   34.98    1.67
   0   2   3   36.99    1.64
  -1  -2  -3    5.58    0.72
  -1  -2  -3    5.22    0.76
  -1  -2  -3    6.52    0.84
  -1  -2  -3    6.78    0.66
  -1  -2  -3    6.06    0.79
   1   2   3    6.25    0.75
   1   2   3    8.44    1.00
   1   2   3    7.93    0.76
   1   2   3    6.65    0.66
   1   2   3    7.17    0.86
  -2  -2  -3    9.44    1.07
  -2  -2  -3   10.11    1.08
  -2  -2  -3   11.09    0.84
  -2  -2  -3   10.28    1.21
   2   2   3    9.64    0.93
   2   2   3   10.67    0.84
   2   2   3   11.68    1.05
   2   2   3   10.59    0.88
   2   2   3    9.66    1.07
  -3  -2  -3   11.37    1.42
  -3  -2  -3   11.00    0.80
  -3  -2  -3    9.49    1.17
  -3  -2  -3   11.49    1.34
   3   2   3   11.54    1.18
   3   2   3   10.17    1.20
   3   2   3    8.79    1.18
  -4  -2  -3  389.53   12.82
  -4  -2  -3  386.51   13.02
   4   2   3  388.58   12.98
   4   2   3  370.92   12.68
  -5  -2  -3    2.63    0.81
  -5  -2  -3    3.90    0.88
   5   2   3    2.77    0.83
   5   2   3    3.83    0.82
  -6  -2  -3   29.25    2.14
  -6  -2  -3   28.60    2.32
   6   2   3   29.74    2.08
   6   2   3   30.02    2.33
  -7  -2  -3   -0.35    0.65
   7   2   3    1.19    0.81
  10  -3  -3    6.34    1.33
 -10   3   3    5.75    1.58
   9  -3  -3    0.83    0.60
   9  -3  -3    1.97    0.76
  -9   3   3    1.40    0.77
   8  -3  -3    7.83    1.24
   8  -3  -3    8.05    1.25
  -8   3   3    7.86    1.48
   7  -3  -3   12.24    1.36
   7  -3  -3    9.04    1.20
  -7   3   3   11.66    1.73
  -7   3   3   11.85    1.05
   6  -3  -3    9.15    1.12
   6  -3  -3    9.03    1.07
  -6   3   3    8.30    1.06
  -6   3   3    8.98    1.35
   5  -3  -3   24.06    1.44
   5  -3  -3   22.77    1.41
  -5   3   3   23.23    1.26
  -5   3   3   20.57    1.42
  -5   3   3   24.70    1.75
   4  -3  -3   87.52    2.93
   4  -3  -3   85.98    3.38
   4  -3  -3   83.57    2.88
   4  -3  -3   88.69    3.33
  -4   3   3   85.89    2.90
  -4   3   3   87.97    3.56
  -4   3   3   84.05    3.65
   3  -3  -3  190.97    6.50
   3  -3  -3  198.14    6.34
   3  -3  -3  194.49    6.12
   3  -3  -3  191.71    6.15
  -3   3   3  183.53    6.65
  -3   3   3  191.12    6.75
  -3   3   3  194.18    6.11
   2  -3  -3   70.77    3.09
   2  -3  -3   76.57    2.75
   2  -3  -3   66.63    2.64
   2  -3  -3   69.53    2.85
  -2   3   3   72.35    2.66
  -2   3   3   79.66    3.13
   1  -3  -3   20.58    1.25
   1  -3  -3   23.01    1.19
   1  -3  -3   17.60    1.14
   1  -3  -3   21.58    1.37
   1  -3  -3   22.92    1.27
  -1   3   3   24.36    1.40
  -1   3   3   22.63    1.22
  -1   3   3   24.81    1.21
   0  -3  -3    0.63    0.31
   0  -3  -3    0.56    0.29
   0  -3  -3    0.43    0.30
   0  -3  -3    0.39    0.27
   0  -3  -3    1.52    0.61
   0   3   3    3.89    0.84
   0   3   3    0.30    0.26
   0   3   3    0.63    0.36
   0   3   3    0.48    0.25
  -1  -3  -3  250.91    8.29
  -1  -3  -3  249.71    8.29
  -1  -3  -3  247.36    8.34
  -1  -3  -3  250.49    8.56
   1   3   3  232.29    8.27
   1   3   3  252.91    8.50
   1   3   3  243.21    8.23
   1   3   3  239.81    8.23
  -2  -3  -3   24.07    1.75
  -2  -3  -3   26.71    1.49
  -2  -3  -3   28.13    1.74
  -2  -3  -3   28.96    1.67
   2   3   3   27.83    1.65
   2   3   3   28.78    1.71
   2   3   3   25.75    1.57
   2   3   3   23.78    1.68
  -3  -3  -3    7.96    1.20
  -3  -3  -3    7.50    1.04
   3   3   3    5.20    0.87
   3   3   3    7.30    1.14
  -4  -3  -3    4.27    0.92
  -4  -3  -3    6.64    1.15
   4   3   3    5.97    0.99
   4   3   3    5.64    1.08
  -5  -3  -3   14.39    1.84
  -5  -3  -3   10.60    1.44
   5   3   3   10.49    1.40
   5   3   3   10.25    1.55
  -6  -3  -3    4.67    1.25
  -6  -3  -3    2.97    0.93
   6   3   3    3.37    1.08
   6   3   3    4.52    0.97
  -7  -3  -3   -0.53    0.82
   7   3   3    0.33    0.76
  10  -4  -3    6.56    1.34
  10  -4  -3   10.50    1.71
 -10   4   3    7.21    1.78
   9  -4  -3   28.76    2.19
   9  -4  -3   25.18    2.13
  -9   4   3   26.29    2.57
   8  -4  -3   53.46    2.92
   8  -4  -3   51.58    2.88
  -8   4   3   42.81    3.19
   7  -4  -3   42.50    2.38
   7  -4  -3   44.18    2.45
  -7   4   3   39.28    2.32
  -7   4   3   38.37    2.74
   6  -4  -3    1.37    0.46
   6  -4  -3    2.23    0.58
  -6   4   3    2.17    0.61
  -6   4   3    1.54    0.59
   5  -4  -3  125.22    4.71
   5  -4  -3  128.85    4.84
  -5   4   3  122.20    5.15
  -5   4   3  125.24    5.01
   4  -4  -3  303.53    9.54
   4  -4  -3  295.88    9.69
   4  -4  -3  300.54   10.18
   4  -4  -3  299.81    9.99
  -4   4   3  309.03    9.73
  -4   4   3  335.99   10.58
  -4   4   3  311.76   10.44
   3  -4  -3   49.01    2.05
   3  -4  -3   50.01    2.28
   3  -4  -3   48.78    2.01
   3  -4  -3   50.76    1.94
  -3   4   3   48.22    2.29
  -3   4   3   46.35    2.01
   2  -4  -3   51.93    2.64
   2  -4  -3   56.75    2.39
   2  -4  -3   56.17    2.47
  -2   4   3   51.82    2.26
  -2   4   3   55.84    2.63
   1  -4  -3   14.46    1.09
   1  -4  -3   15.62    1.13
   1  -4  -3   14.65    0.99
   1  -4  -3   13.19    1.16
   1  -4  -3   13.80    1.06
  -1   4   3   15.13    0.99
  -1   4   3   16.27    0.97
  -1   4   3   15.26    1.07
  -1   4   3   16.90    1.23
   0  -4  -3  278.96    9.56
   0  -4  -3  275.64    9.56
   0  -4  -3  289.36    9.71
   0  -4  -3  270.82    9.30
   0  -4  -3  278.20    9.40
   0   4   3  287.38    9.52
   0   4   3  281.42    9.31
   0   4   3  291.17    9.51
  -1  -4  -3  138.37    5.54
  -1  -4  -3  143.93    5.29
  -1  -4  -3  142.17    5.32
  -1  -4  -3  139.03    5.29
   1   4   3  140.09    5.47
   1   4   3  140.17    5.31
   1   4   3  142.69    5.23
  -2  -4  -3  114.72    4.63
  -2  -4  -3  114.73    4.69
   2   4   3  118.26    4.69
   2   4   3  111.93    4.54
  -3  -4  -3   73.07    3.66
  -3  -4  -3   74.80    3.51
   3   4   3   72.17    3.54
   3   4   3   77.45    3.49
  -4  -4  -3    7.29    1.24
  -4  -4  -3    8.52    1.28
   4   4   3    7.63    1.18
   4   4   3    7.71    1.27
  -5  -4  -3    5.09    1.23
  -5  -4  -3    5.14    1.27
   5   4   3    6.45    1.17
   5   4   3    5.57    1.21
  -6  -4  -3    7.09    1.39
  -6  -4  -3    6.35    1.36
   6   4   3    9.12    1.68
   6   4   3    6.76    1.28
  10  -5  -3    3.61    1.14
  10  -5  -3    4.07    1.15
 -10   5   3    7.33    1.82
   9  -5  -3    7.80    1.36
   9  -5  -3   10.23    1.59
  -9   5   3   10.86    1.96
   8  -5  -3   33.66    2.25
   8  -5  -3   35.21    2.35
  -8   5   3   34.47    2.76
   7  -5  -3   57.59    3.02
   7  -5  -3   57.44    2.95
  -7   5   3   54.07    3.36
  -7   5   3   57.34    3.05
   6  -5  -3    6.60    0.98
   6  -5  -3    6.35    0.97
  -6   5   3    4.13    0.94
  -6   5   3    5.47    1.00
   5  -5  -3   11.20    1.18
   5  -5  -3   10.20    1.21
  -5   5   3   10.42    1.34
  -5   5   3   10.28    1.37
   4  -5  -3   70.08    2.86
   4  -5  -3   72.02    3.18
   4  -5  -3   70.03    2.91
  -4   5   3   72.92    2.88
  -4   5   3   70.08    3.24
  -4   5   3   77.21    3.50
   3  -5  -3   13.48    1.00
   3  -5  -3   11.00    1.17
   3  -5  -3   13.47    0.87
   3  -5  -3   13.57    0.85
  -3   5   3   11.82    0.94
  -3   5   3   12.75    1.20
  -3   5   3   11.76    1.00
   2  -5  -3    5.96    0.86
   2  -5  -3    4.72    0.85
   2  -5  -3    7.19    0.94
  -2   5   3    5.75    0.71
  -2   5   3    7.29    1.08
  -2   5   3    6.54    0.85
   1  -5  -3  254.72    8.53
   1  -5  -3  235.35    8.30
   1  -5  -3  251.10    8.96
   1  -5  -3  248.62    8.60
  -1   5   3  255.18    8.75
  -1   5   3  245.38    8.53
  -1   5   3  249.35    8.31
   0  -5  -3  230.89    8.13
   0  -5  -3  235.82    8.08
   0  -5  -3  224.38    8.31
   0   5   3  238.58    8.31
   0   5   3  241.05    8.05
  -1  -5  -3    8.01    1.21
  -1  -5  -3    9.63    1.21
  -1  -5  -3    9.64    1.24
   1   5   3    9.77    1.26
   1   5   3    9.33    1.32
   1   5   3    8.70    1.14
  -2  -5  -3   52.61    2.81
  -2  -5  -3   49.76    2.73
   2   5   3   56.20    2.93
   2   5   3   51.54    2.70
  -3  -5  -3   33.21    2.21
  -3  -5  -3   32.59    2.31
   3   5   3   35.04    2.31
   3   5   3   32.24    2.12
  -4  -5  -3    7.08    1.29
  -4  -5  -3    5.35    1.20
   4   5   3    6.85    1.20
   4   5   3    6.46    1.32
  -5  -5  -3   11.22    1.74
  -5  -5  -3    8.98    1.70
   5   5   3    7.51    1.38
   5   5   3    9.64    1.67
  -6  -5  -3   30.04    3.27
  -6  -5  -3   26.33    2.73
   6   5   3   28.70    2.95
   6   5   3   22.90    2.41
  10  -6  -3    0.13    0.50
  10  -6  -3    0.03    0.59
 -10   6   3    0.01    0.75
   9  -6  -3   70.93    3.82
   9  -6  -3   73.59    3.99
  -9   6   3   73.61    4.54
   8  -6  -3    3.88    0.95
   8  -6  -3    3.41    0.87
  -8   6   3    3.30    1.03
   7  -6  -3    4.26    0.89
   7  -6  -3    3.79    0.88
  -7   6   3    3.96    0.98
  -7   6   3    5.52    1.18
   6  -6  -3   34.49    2.26
   6  -6  -3   42.28    2.27
  -6   6   3   43.52    2.69
  -6   6   3   40.09    2.57
   5  -6  -3    8.06    1.14
   5  -6  -3    7.31    0.94
  -5   6   3    5.96    1.04
  -5   6   3    8.87    1.42
   4  -6  -3  139.77    5.08
   4  -6  -3  142.48    5.49
   4  -6  -3  142.71    5.23
  -4   6   3  146.81    5.88
  -4   6   3  140.73    5.19
  -4   6   3  135.69    5.39
   3  -6  -3   57.79    2.82
   3  -6  -3   61.73    2.81
   3  -6  -3   57.48    2.37
   3  -6  -3   57.18    2.40
  -3   6   3   57.27    3.07
  -3   6   3   58.25    2.63
  -3   6   3   55.56    2.66
   2  -6  -3   30.16    1.87
   2  -6  -3   28.19    1.57
  -2   6   3   29.14    1.98
  -2   6   3   28.36    1.64
  -2   6   3   27.55    1.54
  -2   6   3   27.04    1.72
   1  -6  -3   60.76    2.93
   1  -6  -3   58.94    2.72
   1  -6  -3   61.11    3.01
  -1   6   3   58.12    2.91
  -1   6   3   60.55    2.72
   0  -6  -3   89.07    3.83
   0  -6  -3   84.41    4.35
   0  -6  -3   83.57    3.67
   0   6   3   83.11    4.30
   0   6   3   84.80    3.63
  -1  -6  -3   23.01    1.72
  -1  -6  -3   22.57    1.75
   1   6   3   24.46    1.69
  -2  -6  -3    1.41    0.78
  -2  -6  -3    1.51    0.65
   2   6   3    1.21    0.54
   2   6   3    1.31    0.69
  -3  -6  -3   -0.32    0.47
  -3  -6  -3    0.70    0.56
   3   6   3    0.07    0.46
   3   6   3    0.89    0.50
  -4  -6  -3   18.13    2.25
  -4  -6  -3   16.10    2.07
   4   6   3   15.11    1.89
   4   6   3   10.88    1.69
  -5  -6  -3   42.05    2.99
  -5  -6  -3   41.58    3.10
   5   6   3   38.19    2.77
   5   6   3   44.31    3.11
   9  -7  -3    4.46    1.13
   9  -7  -3    3.62    1.00
  -9   7   3    3.33    1.23
   8  -7  -3    8.28    1.35
   8  -7  -3    9.20    1.50
  -8   7   3    5.24    1.26
   7  -7  -3    0.93    0.55
   7  -7  -3    1.22    0.54
  -7   7   3    0.41    0.53
   6  -7  -3    6.25    0.97
   6  -7  -3    3.20    0.81
  -6   7   3    6.22    1.22
  -6   7   3    6.67    1.20
   5  -7  -3    3.51    0.86
   5  -7  -3    4.70    0.81
  -5   7   3    4.16    1.05
   4  -7  -3  395.56   13.19
   4  -7  -3  381.13   12.55
  -4   7   3  386.87   13.61
  -4   7   3  405.92   12.94
  -4   7   3  375.96   13.62
   3  -7  -3  156.13    5.49
   3  -7  -3  156.45    6.02
  -3   7   3  148.25    5.44
  -3   7   3  155.19    5.77
  -3   7   3  153.00    5.88
   2  -7  -3   52.55    2.45
   2  -7  -3   48.63    2.68
  -2   7   3   44.54    2.56
  -2   7   3   51.58    2.40
   1  -7  -3   29.34    1.97
   1  -7  -3   27.53    1.77
  -1   7   3   29.75    1.79
   0  -7  -3   73.51    3.62
   0  -7  -3   78.83    3.60
   0   7   3   77.60    3.53
  -1  -7  -3    1.01    0.62
  -1  -7  -3    1.73    0.72
   1   7   3    0.94    0.53
  -2  -7  -3   61.63    3.35
  -2  -7  -3   58.88    3.32
   2   7   3   60.69    3.27
  -3  -7  -3    6.15    1.32
  -3  -7  -3    4.14    1.20
   3   7   3    5.99    1.23
  -4  -7  -3   31.84    2.69
  -4  -7  -3   34.96    2.70
   4   7   3   35.98    2.65
   4   7   3   35.49    2.78
   9  -8  -3    1.19    0.68
   9  -8  -3    1.28    0.77
  -9   8   3    0.72    0.72
   8  -8  -3    1.46    0.72
   8  -8  -3    1.09    0.66
  -8   8   3    2.38    0.95
   7  -8  -3   15.39    1.71
   7  -8  -3   13.77    1.74
  -7   8   3   16.33    2.02
   6  -8  -3    4.45    0.86
   6  -8  -3    4.43    1.01
  -6   8   3    4.77    1.18
  -6   8   3    2.70    0.76
   5  -8  -3  252.07    9.31
   5  -8  -3  249.59    8.71
  -5   8   3  252.14    9.76
   4  -8  -3   58.84    3.17
   3  -8  -3    0.06    0.29
   3  -8  -3    0.07    0.35
  -3   8   3   -0.03    0.24
  -3   8   3    0.12    0.40
  -3   8   3   -0.02    0.30
   2  -8  -3   12.11    1.39
   2  -8  -3   11.84    1.56
  -2   8   3   11.17    1.32
   1  -8  -3   -0.01    0.42
   1  -8  -3   -0.09    0.32
  -1   8   3    0.19    0.39
   0  -8  -3    0.50    0.45
   0  -8  -3    0.63    0.60
   0   8   3    0.31    0.36
  -1  -8  -3    3.66    0.99
  -1  -8  -3    2.30    0.83
   1   8   3    3.49    0.87
  -2  -8  -3   34.59    2.54
  -2  -8  -3   30.67    2.36
   2   8   3   31.19    2.30
  -3  -8  -3    0.60    0.76
  -3  -8  -3   -0.13    0.76
   3   8   3    0.58    0.57
  -4  -8  -3    2.95    1.19
  -4  -8  -3    3.81    1.15
   4   8   3    4.94    1.27
   9  -9  -3    1.89    0.84
   9  -9  -3    2.06    0.99
  -9   9   3    2.08    1.01
   8  -9  -3   42.32    2.99
   8  -9  -3   43.34    2.78
  -8   9   3   44.62    3.24
   7  -9  -3    7.52    1.41
   7  -9  -3    8.00    1.24
   6  -9  -3    3.26    0.75
   6  -9  -3    2.49    0.81
   5  -9  -3   73.97    3.89
   4  -9  -3    2.43    0.80
  -4   9   3    2.04    0.73
   3  -9  -3    0.75    0.50
   2  -9  -3    0.07    0.47
   2  -9  -3    0.14    0.35
  -2   9   3    0.22    0.36
   1  -9  -3    8.19    1.30
   1  -9  -3    6.96    1.24
  -1   9   3    7.62    1.24
   0  -9  -3  115.70    5.29
   0  -9  -3  115.50    5.17
   0   9   3  116.57    5.09
  -1  -9  -3   11.48    1.70
  -1  -9  -3   11.49    1.75
   1   9   3   11.91    1.73
  -2  -9  -3   -0.07    0.90
  -2  -9  -3   -0.15    0.55
   2   9   3    0.17    0.49
  -3  -9  -3   21.04    2.50
  -3  -9  -3   24.38    2.89
   3   9   3   22.72    2.54
   8 -10  -3   16.12    2.12
   8 -10  -3   19.10    2.11
   7 -10  -3   27.79    2.04
   7 -10  -3   23.09    2.53
   6 -10  -3   32.78    2.56
   5 -10  -3   16.21    1.99
   4 -10  -3    1.42    0.67
   3 -10  -3    9.54    1.58
   2 -10  -3    0.70    0.66
   2 -10  -3    1.68    0.69
  -2  10   3    0.45    0.45
   1 -10  -3   61.83    3.54
   1 -10  -3   51.74    3.11
  -1  10   3   57.21    3.15
   0 -10  -3   21.19    2.29
   0 -10  -3   25.58    2.72
   0  10   3   16.57    2.01
  -1 -10  -3   12.60    1.94
  -1 -10  -3   13.20    1.94
   1  10   3   12.85    1.79
  -2 -10  -3    9.15    1.80
  -2 -10  -3    3.78    1.24
   2  10   3    2.17    0.89
   7 -11  -3    3.39    1.14
   6 -11  -3    1.12    0.77
   5 -11  -3    1.53    0.77
   4 -11  -3   73.87    4.16
   3 -11  -3  154.46    6.79
   2 -11  -3   -0.15    0.78
   2 -11  -3    0.48    0.63
   1 -11  -3    1.31    0.77
   1 -11  -3    0.65    0.55
  -1  11   3    0.74    0.58
   0 -11  -3   14.41    2.15
   0 -11  -3    7.16    1.45
   0  11   3    7.58    1.46
   6 -12  -3   16.66    2.38
   5 -12  -3   26.40    2.87
   4 -12  -3   30.79    2.68
   3 -12  -3    3.82    1.11
   2 -12  -3   32.55    3.26
   1  12  -4   14.85    2.02
   0  12  -4    7.68    1.40
   2 -12   4   49.17    3.05
   3 -12   4    6.71    1.27
   4 -12   4    1.17    0.75
   5 -12   4    5.34    1.23
   5 -12   4    4.53    1.14
   2  11  -4   14.13    1.97
   1  11  -4    1.62    0.83
   0  11  -4  158.85    6.72
  -1  11  -4   10.29    2.27
   1 -11   4   10.92    1.55
   2 -11   4    6.38    1.21
   3 -11   4    2.96    0.91
   4 -11   4    3.78    1.03
   4 -11   4    3.40    1.00
   5 -11   4   23.22    2.35
   5 -11   4   19.83    2.20
   6 -11   4   26.32    2.73
   6 -11   4   22.77    2.56
   3  10  -4   93.95    4.93
   2  10  -4   44.75    3.03
   1  10  -4   93.84    4.58
   0  10  -4    1.59    0.72
  -1  10  -4   46.22    2.72
   2 -10   4    0.17    0.51
   3 -10   4   48.03    2.73
   3 -10   4   46.25    2.76
   4 -10   4    0.09    0.47
   4 -10   4    0.72    0.47
   5 -10   4    0.34    0.53
   5 -10   4    0.20    0.50
   6 -10   4   27.99    2.36
   6 -10   4   31.19    2.39
   7 -10   4    3.68    1.13
   7 -10   4    1.99    0.83
   5   9  -4    2.23    0.94
   4   9  -4   24.73    2.61
   3   9  -4   48.22    3.14
   2   9  -4   36.28    2.55
   1   9  -4   28.11    2.11
   0   9  -4   35.36    2.31
  -1   9  -4   72.29    3.45
   2  -9   4   70.27    3.26
   2  -9   4   67.41    3.38
   3  -9   4   33.26    2.13
   3  -9   4   31.60    2.13
   4  -9   4    8.15    1.25
   4  -9   4    7.18    1.22
   5  -9   4   19.11    2.08
   5  -9   4   17.42    1.96
   6  -9   4    4.21    1.05
   6  -9   4    5.12    1.15
   7  -9   4    9.62    1.60
   7  -9   4   12.53    1.92
   5   8  -4    1.86    0.79
   4   8  -4   63.06    3.67
   3   8  -4    6.19    1.17
   2   8  -4   24.11    1.91
   1   8  -4   27.87    1.98
   0   8  -4    0.15    0.34
  -1   8  -4   37.78    2.13
   1  -8   4   33.85    1.92
  -2   8  -4   39.87    2.11
   2  -8   4   35.30    2.18
   2  -8   4   39.98    2.15
   3  -8   4   33.31    2.12
   3  -8   4   34.73    2.09
  -4   8  -4    0.90    0.55
   4  -8   4    1.52    0.66
   4  -8   4    1.27    0.54
  -5   8  -4    6.85    1.57
   5  -8   4    5.26    1.05
   5  -8   4    5.15    1.08
   6  -8   4    0.17    0.42
   6  -8   4    0.53    0.49
   7  -8   4   24.29    2.48
   7  -8   4   24.54    2.59
   6   7  -4    1.55    0.82
   5   7  -4   26.60    2.66
   4   7  -4    8.38    1.36
   3   7  -4    1.14    0.56
   2   7  -4    6.57    1.06
   1   7  -4   79.49    3.64
   0   7  -4    5.44    0.87
  -1   7  -4  115.36    4.48
   1  -7   4  113.85    4.33
  -2   7  -4    2.66    0.60
  -2   7  -4    4.09    1.11
   2  -7   4    2.32    0.65
   2  -7   4    2.85    0.63
   2  -7   4    2.58    0.69
  -3   7  -4    0.69    0.51
   3  -7   4    0.93    0.48
   3  -7   4    1.43    0.61
   3  -7   4    1.13    0.49
  -4   7  -4   55.55    3.42
   4  -7   4   54.08    2.89
   4  -7   4   57.64    2.91
  -5   7  -4   13.54    2.06
   5  -7   4   13.60    1.60
   5  -7   4   15.55    1.77
   6  -7   4   53.00    3.09
   6  -7   4   59.51    3.33
   7  -7   4    8.25    1.44
   7  -7   4   11.21    1.67
   8  -7   4    3.14    1.09
   8  -7   4    3.76    1.10
   7   6  -4    6.07    1.34
  -7  -6   4    3.84    1.18
   6   6  -4    0.58    0.56
   5   6  -4   10.15    1.48
   5   6  -4   11.26    1.48
   4   6  -4   73.04    3.64
   4   6  -4   69.87    3.33
   3   6  -4   45.64    2.58
   2   6  -4  220.29    8.50
   2   6  -4  235.41    8.24
   1   6  -4   33.31    1.90
   1   6  -4   31.53    2.11
   0   6  -4  143.91    6.06
   0   6  -4  152.72    5.67
   0  -6   4  156.56    5.61
   0  -6   4  169.33    5.40
  -1   6  -4   57.32    3.02
  -1   6  -4   59.62    2.58
   1  -6   4   59.89    2.50
   1  -6   4   56.39    2.70
  -2   6  -4  130.63    5.43
  -2   6  -4  122.53    4.46
  -2   6  -4  119.31    5.15
   2  -6   4  116.76    4.72
   2  -6   4  121.35    4.60
   2  -6   4  122.20    4.93
  -3   6  -4   23.21    1.94
   3  -6   4   25.00    1.86
   3  -6   4   24.69    1.60
   3  -6   4   24.02    1.63
  -4   6  -4    0.69    0.50
   4  -6   4    0.17    0.35
   4  -6   4    0.95    0.49
  -5   6  -4   10.48    1.63
   5  -6   4    6.11    1.00
   5  -6   4    7.24    1.15
   6  -6   4   39.98    2.53
   6  -6   4   43.23    2.75
   7  -6   4   17.89    2.22
   7  -6   4   16.50    1.94
   8  -6   4   26.92    2.87
   8  -6   4   28.44    2.30
   7   5  -4    0.39    0.59
   6   5  -4    2.43    0.83
   6   5  -4    2.44    0.80
   5   5  -4   17.63    1.72
   5   5  -4   17.02    1.81
   4   5  -4  102.93    4.24
   4   5  -4  104.96    4.52
   3   5  -4  216.89    7.62
   3   5  -4  218.91    8.07
   3   5  -4  218.45    7.89
   2   5  -4  246.89    8.68
   2   5  -4  257.47    9.01
   1   5  -4   57.83    3.20
   1   5  -4   54.63    2.78
   1   5  -4   54.72    2.53
  -1  -5   4   54.57    2.50
   0   5  -4   15.73    1.14
   0   5  -4   17.59    1.39
   0   5  -4   18.01    1.47
   0  -5   4   14.36    1.14
   0  -5   4   19.53    1.44
  -1   5  -4   51.52    2.72
  -1   5  -4   50.48    2.28
  -1   5  -4   55.52    2.90
   1  -5   4   56.52    2.29
   1  -5   4   52.93    2.56
  -2   5  -4   79.86    3.82
  -2   5  -4   93.39    4.16
  -2   5  -4   88.78    3.34
   2  -5   4   88.72    3.51
   2  -5   4   86.47    3.60
   2  -5   4   94.82    3.91
  -3   5  -4   63.08    3.28
  -3   5  -4   64.90    3.39
  -3   5  -4   71.72    2.70
   3  -5   4   69.48    3.02
   3  -5   4   65.22    2.97
   3  -5   4   64.25    3.31
  -4   5  -4    3.89    0.71
  -4   5  -4    3.47    0.89
   4  -5   4    3.09    0.88
   4  -5   4    2.37    0.61
   4  -5   4    2.07    0.59
  -5   5  -4   73.40    3.79
   5  -5   4   71.21    3.58
   5  -5   4   73.81    3.44
   6  -5   4   27.83    1.96
   7  -5   4    4.90    1.16
   7  -5   4    3.01    0.90
   8  -5   4    0.11    0.60
   8  -5   4    0.78    0.58
   8   4  -4    9.77    1.67
   7   4  -4    0.42    0.51
   7   4  -4    0.94    0.61
   6   4  -4   56.53    3.05
   6   4  -4   54.19    2.91
   5   4  -4   74.66    3.53
   5   4  -4   67.74    3.64
   5   4  -4   73.99    3.36
   4   4  -4   47.71    2.43
   4   4  -4   45.50    2.48
  -4  -4   4   48.20    2.54
   3   4  -4   72.23    3.11
   3   4  -4   64.36    3.11
   3   4  -4   65.37    2.93
  -3  -4   4   70.62    3.07
   2   4  -4    0.15    0.22
   2   4  -4    0.00    0.23
   2   4  -4   -0.03    0.18
  -2  -4   4    0.30    0.35
  -2  -4   4    0.21    0.28
   1   4  -4  208.83    7.36
   1   4  -4  208.86    7.06
   1   4  -4  197.16    7.23
  -1  -4   4  203.53    7.27
  -1  -4   4  214.21    7.26
   0   4  -4  125.30    4.87
   0   4  -4  123.21    4.99
   0   4  -4  125.60    4.57
   0  -4   4  135.81    5.03
   0  -4   4  130.73    4.87
   0  -4   4  124.74    4.72
  -1   4  -4   77.93    3.40
  -1   4  -4   84.45    3.64
  -1   4  -4   76.78    3.02
   1  -4   4   77.12    3.36
   1  -4   4   80.87    3.00
  -2   4  -4   95.35    4.15
  -2   4  -4   96.05    4.28
  -2   4  -4  105.64    3.68
   2  -4   4  106.54    3.94
   2  -4   4  100.73    4.20
   2  -4   4   98.96    3.82
  -3   4  -4    1.93    0.42
  -3   4  -4    1.83    0.58
  -3   4  -4    2.17    0.64
   3  -4   4    2.10    0.63
   3  -4   4    2.89    0.60
   3  -4   4    2.43    0.57
  -4   4  -4   -0.06    0.22
   4  -4   4    0.19    0.24
   4  -4   4    0.03    0.33
   4  -4   4    0.18    0.28
  -5   4  -4  102.58    4.55
   5  -4   4  105.88    4.55
   5  -4   4   93.25    4.18
   6  -4   4    0.44    0.52
   6  -4   4    0.82    0.47
   7  -4   4   12.98    1.86
   7  -4   4   14.09    1.70
   8  -4   4    0.18    0.46
   8  -4   4   -0.26    0.58
   8   3  -4    6.30    1.29
   7   3  -4   46.82    2.75
   7   3  -4   41.77    2.62
   6   3  -4    1.16    0.52
   6   3  -4    0.61    0.49
  -6  -3   4    0.47    0.46
   5   3  -4   48.86    2.59
   5   3  -4   50.93    2.63
   5   3  -4   51.98    2.66
  -5  -3   4   59.51    3.16
  -5  -3   4   52.16    2.84
   4   3  -4  107.93    4.32
   4   3  -4  108.35    4.22
   4   3  -4  105.23    4.27
  -4  -3   4  109.40    4.45
  -4  -3   4  110.18    4.33
   3   3  -4   44.78    2.19
   3   3  -4   46.64    2.19
   3   3  -4   40.98    2.06
   3   3  -4   44.81    2.12
  -3  -3   4   45.50    2.25
  -3  -3   4   43.63    2.17
   2   3  -4   28.51    1.61
   2   3  -4   28.16    1.62
   2   3  -4   30.47    1.57
   2   3  -4   28.50    1.56
  -2  -3   4   31.49    1.84
  -2  -3   4   29.53    1.62
   1   3  -4   38.06    1.89
   1   3  -4   36.84    1.96
   1   3  -4   37.38    1.78
  -1  -3   4   37.71    1.86
   0   3  -4    8.20    0.69
   0   3  -4    7.86    1.07
   0   3  -4    5.57    0.75
   0  -3   4    8.91    0.81
   0  -3   4    6.38    0.85
  -1   3  -4  110.45    4.32
  -1   3  -4  106.59    4.39
  -1   3  -4  114.71    3.97
   1  -3   4  108.27    4.33
   1  -3   4  115.37    3.97
   1  -3   4  112.34    4.32
  -2   3  -4  457.56   14.94
  -2   3  -4  455.86   14.25
  -2   3  -4  438.00   14.82
   2  -3   4  467.01   14.96
   2  -3   4  448.60   14.48
   2  -3   4  471.16   14.48
  -3   3  -4    2.81    0.68
  -3   3  -4    3.80    0.52
  -3   3  -4    2.19    0.62
  -3   3  -4    2.87    0.52
   3  -3   4    2.55    0.70
   3  -3   4    3.43    0.65
   3  -3   4    2.28    0.55
  -4   3  -4    4.19    0.83
   4  -3   4    3.66    0.76
   4  -3   4    5.08    1.04
   4  -3   4    4.47    0.76
  -5   3  -4    0.47    0.41
   5  -3   4    1.12    0.42
   5  -3   4   -0.02    0.36
   6  -3   4    2.89    0.73
   6  -3   4    3.54    0.89
   7  -3   4   15.29    1.74
   7  -3   4   11.25    1.63
   8  -3   4    3.84    1.21
   9   2  -4    1.72    0.76
   8   2  -4    0.43    0.47
  -8  -2   4    1.21    0.78
   7   2  -4    7.92    1.26
  -7  -2   4   11.61    1.66
   6   2  -4   73.96    3.45
   6   2  -4   73.42    3.40
  -6  -2   4   76.05    3.84
   5   2  -4   82.59    3.45
   5   2  -4   82.64    3.60
   5   2  -4   85.10    3.59
  -5  -2   4   82.85    3.89
  -5  -2   4   87.67    3.86
   4   2  -4    2.93    0.64
   4   2  -4    4.35    0.67
   4   2  -4    2.71    0.56
  -4  -2   4    4.17    0.66
  -4  -2   4    3.79    0.75
   3   2  -4    2.81    0.60
   3   2  -4    4.75    0.70
   3   2  -4    3.92    0.59
  -3  -2   4    4.26    0.76
  -3  -2   4    3.61    0.55
   2   2  -4   56.96    2.40
   2   2  -4   58.81    2.41
   2   2  -4   58.59    2.39
  -2  -2   4   56.62    2.35
  -2  -2   4   59.79    2.67
   1   2  -4   44.86    1.96
   1   2  -4   46.44    2.02
  -1  -2   4   46.60    2.00
   0   2  -4   68.18    2.81
   0   2  -4   66.59    2.93
   0   2  -4   71.27    2.66
   0  -2   4   70.95    2.82
   0  -2   4   68.23    2.94
  -1   2  -4   73.68    2.71
  -1   2  -4   69.34    3.03
  -1   2  -4   65.74    2.92
   1  -2   4   74.74    3.01
   1  -2   4   70.78    3.07
   1  -2   4   68.73    2.69
  -2   2  -4   83.62    3.12
  -2   2  -4   81.83    3.54
  -2   2  -4   82.89    3.51
   2  -2   4   83.26    3.19
   2  -2   4   85.41    3.32
   2  -2   4   80.91    3.60
  -3   2  -4   36.33    1.76
  -3   2  -4   38.37    2.23
  -3   2  -4   39.27    2.12
   3  -2   4   39.90    2.06
   3  -2   4   35.46    2.26
   3  -2   4   37.07    1.84
  -4   2  -4   50.60    2.23
  -4   2  -4   46.96    2.46
   4  -2   4   48.90    2.33
   4  -2   4   48.44    2.91
   4  -2   4   48.38    2.57
  -5   2  -4   18.79    1.41
   5  -2   4   16.14    1.70
   5  -2   4   17.38    1.33
   6  -2   4   70.92    3.36
   6  -2   4   73.81    3.79
   7  -2   4   40.50    2.82
   8  -2   4    1.62    0.91
   9   1  -4    2.35    0.88
  -9  -1   4    2.69    1.02
   8   1  -4  125.52    5.46
  -8  -1   4  128.10    6.13
   7   1  -4   51.75    2.85
  -7  -1   4   54.68    3.32
   6   1  -4   50.46    2.70
   6   1  -4   58.50    2.69
  -6  -1   4   56.53    3.16
   5   1  -4   39.53    2.01
   5   1  -4   39.93    2.10
   5   1  -4   39.40    1.98
  -5  -1   4   42.59    2.44
   4   1  -4    0.34    0.18
   4   1  -4    0.09    0.22
   4   1  -4    0.10    0.21
  -4  -1   4    0.44    0.22
  -4  -1   4    0.76    0.37
  -4  -1   4    0.45    0.21
   3   1  -4  388.80   12.35
   3   1  -4  390.38   12.39
   3   1  -4  388.34   12.14
  -3  -1   4  400.18   12.74
  -3  -1   4  379.79   12.12
   2   1  -4   78.68    2.86
   2   1  -4   77.52    2.96
   2   1  -4   80.20    3.00
  -2  -1   4   79.24    2.84
  -2  -1   4   79.26    3.28
   1   1  -4    1.88    0.46
   1   1  -4    1.80    0.37
   1   1  -4    1.58    0.33
  -1  -1   4    1.70    0.34
   0   1  -4    5.84    0.69
   0   1  -4    6.25    0.69
   0   1  -4    5.86    0.73
   0  -1   4    6.65    0.76
   0  -1   4    7.33    0.93
  -1   1  -4   95.98    3.80
  -1   1  -4   99.14    3.54
  -1   1  -4   97.51    3.79
   1  -1   4   97.68    3.76
   1  -1   4   98.34    3.56
   1  -1   4   93.59    3.86
  -2   1  -4  285.32    9.99
  -2   1  -4  303.54   10.22
  -2   1  -4  314.38   10.09
  -2   1  -4  303.99    9.76
   2  -1   4  301.32   10.30
   2  -1   4  307.37    9.94
  -3   1  -4   16.68    1.10
  -3   1  -4   16.21    1.19
  -3   1  -4   14.21    1.32
   3  -1   4   14.76    1.18
   3  -1   4   16.58    1.45
   3  -1   4   15.18    1.01
  -4   1  -4  136.77    5.02
  -4   1  -4  131.67    4.85
   4  -1   4  124.79    4.78
   4  -1   4  130.50    5.64
   4  -1   4  129.31    5.22
  -5   1  -4   36.54    1.92
   5  -1   4   32.16    1.88
   5  -1   4   34.47    2.27
   6  -1   4   29.95    2.22
   7  -1   4    8.40    1.53
   9   0  -4   14.63    1.93
  -9   0   4   14.40    2.17
   8   0  -4    9.58    1.38
  -8   0   4    6.81    1.44
   7   0  -4   51.49    2.76
  -7   0   4   51.07    3.20
   6   0  -4  129.95    4.62
   6   0  -4   96.87    5.29
   6   0  -4  131.10    4.90
  -6   0   4  123.75    5.35
   5   0  -4  109.58    4.05
   5   0  -4  115.37    4.18
   5   0  -4  111.12    4.35
  -5   0   4  113.32    4.78
   4   0  -4  162.57    5.37
   4   0  -4  165.35    5.88
  -4   0   4  172.01    5.40
  -4   0   4  172.93    5.42
  -4   0   4  166.23    6.27
  -4   0   4  173.47    5.84
   3   0  -4  117.21    4.24
   3   0  -4  115.27    4.32
   3   0  -4  126.69    3.94
  -3   0   4  121.56    4.67
  -3   0   4  122.11    3.91
  -3   0   4  131.03    4.51
   2   0  -4    7.30    0.72
   2   0  -4    7.08    0.47
  -2   0   4    7.24    0.70
  -2   0   4    6.91    0.46
  -2   0   4    8.37    0.99
   1   0  -4   82.26    3.05
   1   0  -4   85.83    3.38
   1   0  -4   86.72    3.13
  -1   0   4   88.13    3.06
  -1   0   4   85.07    3.35
   0   0  -4  144.20    4.90
   0   0  -4  139.23    4.98
   0   0  -4  137.57    5.11
   0   0   4  151.68    5.14
   0   0   4  133.16    5.13
   0   0   4  149.01    5.01
  -1   0  -4   38.87    1.77
  -1   0  -4   37.09    1.94
  -1   0  -4   38.71    1.81
  -1   0  -4   39.75    1.98
  -1   0  -4   38.55    1.92
   1   0   4   37.88    1.81
   1   0   4   41.53    1.96
   1   0   4   35.63    1.96
  -2   0  -4  132.85    5.07
  -2   0  -4  134.34    4.71
  -2   0  -4  124.91    4.80
  -2   0  -4  126.02    4.78
   2   0   4  126.59    4.81
   2   0   4  134.42    5.11
  -3   0  -4    4.21    0.72
  -3   0  -4    2.70    0.69
  -3   0  -4    3.98    0.67
   3   0   4    4.14    0.58
   3   0   4    3.29    0.77
   3   0   4    3.37    0.71
  -4   0  -4   67.03    2.97
  -4   0  -4   68.20    2.88
   4   0   4   64.20    3.21
   4   0   4   68.78    3.58
   4   0   4   63.62    2.74
  -5   0  -4   16.23    1.87
  -5   0  -4   18.19    1.43
   5   0   4   17.25    1.88
  -6   0  -4    9.45    1.50
   6   0   4   10.64    1.60
  -7   0  -4    7.72    1.64
   7   0   4   12.12    1.79
   9  -1  -4    2.09    0.88
  -9   1   4    2.74    1.08
   8  -1  -4    9.28    1.36
  -8   1   4    5.11    1.25
   7  -1  -4    3.55    0.78
   7  -1  -4    2.86    0.68
  -7   1   4    2.32    0.83
   6  -1  -4  254.59    8.80
   6  -1  -4  268.64    9.12
  -6   1   4  261.20    8.68
  -6   1   4  268.89    9.72
   5  -1  -4    8.97    0.78
   5  -1  -4   11.52    1.17
   5  -1  -4    9.68    0.75
  -5   1   4   10.23    0.86
  -5   1   4    8.45    1.22
   4  -1  -4   59.48    2.27
   4  -1  -4   54.94    2.23
   4  -1  -4   52.90    2.39
  -4   1   4   56.17    2.49
  -4   1   4   56.33    2.77
   3  -1  -4  693.77   21.48
  -3   1   4  702.90   21.78
  -3   1   4  699.23   21.93
   2  -1  -4    0.12    0.11
   2  -1  -4   -0.02    0.14
   2  -1  -4    0.03    0.09
  -2   1   4   -0.04    0.23
  -2   1   4    0.07    0.18
  -2   1   4    0.22    0.11
   1  -1  -4  200.93    6.82
   1  -1  -4  222.11    7.25
   1  -1  -4  211.50    6.92
   1  -1  -4  201.66    6.84
  -1   1   4  203.62    6.84
  -1   1   4  227.22    7.24
   0  -1  -4   93.21    3.63
   0  -1  -4   90.01    3.60
   0  -1  -4   92.77    3.52
   0  -1  -4   98.59    3.78
   0   1   4   98.20    3.64
   0   1   4   99.89    3.75
   0   1   4  102.24    3.57
   0   1   4   95.67    3.76
  -1  -1  -4  338.96   11.37
  -1  -1  -4  331.63   11.46
  -1  -1  -4  345.55   11.29
  -1  -1  -4  348.40   11.22
  -1  -1  -4  355.54   11.54
   1   1   4  339.88   11.46
   1   1   4  365.75   11.33
   1   1   4  359.28   11.40
   1   1   4  358.40   11.50
  -2  -1  -4    9.08    1.13
  -2  -1  -4   11.06    1.20
  -2  -1  -4   10.53    0.90
  -2  -1  -4    9.86    0.88
   2   1   4   12.03    1.10
   2   1   4    9.53    1.07
  -3  -1  -4   19.12    1.46
  -3  -1  -4   14.52    1.40
  -3  -1  -4   18.36    1.33
  -3  -1  -4   18.23    1.21
   3   1   4   18.72    1.57
   3   1   4   18.24    1.41
  -4  -1  -4    5.81    1.00
  -4  -1  -4    7.03    0.85
  -4  -1  -4    7.23    1.20
   4   1   4    6.27    1.04
  -5  -1  -4    4.81    0.98
  -5  -1  -4    2.23    0.83
   5   1   4    3.30    0.88
  -6  -1  -4   19.54    2.26
   6   1   4   19.06    2.19
  -7  -1  -4    1.29    0.89
   7   1   4    0.69    0.82
  10  -2  -4    4.16    1.14
 -10   2   4    2.91    1.18
   9  -2  -4   16.71    2.03
  -9   2   4   11.98    2.03
   8  -2  -4    5.60    1.04
   8  -2  -4    7.55    1.26
  -8   2   4    6.78    1.43
   7  -2  -4   58.18    2.76
   7  -2  -4   54.48    2.83
  -7   2   4   50.01    2.44
  -7   2   4   59.03    3.42
   6  -2  -4  149.84    5.52
   6  -2  -4  152.01    5.69
  -6   2   4  148.81    5.54
  -6   2   4  152.94    6.26
   5  -2  -4  106.12    4.18
   5  -2  -4  110.51    3.82
   5  -2  -4  107.50    4.05
  -5   2   4  103.15    4.59
  -5   2   4  112.25    4.29
   4  -2  -4  160.55    5.56
   4  -2  -4  158.99    5.49
   4  -2  -4  156.18    5.30
  -4   2   4  160.16    6.01
  -4   2   4  162.19    5.82
   3  -2  -4  154.31    5.14
   3  -2  -4  149.94    5.06
   3  -2  -4  149.14    5.16
  -3   2   4  149.29    5.56
  -3   2   4  154.70    5.55
   2  -2  -4    8.30    0.57
   2  -2  -4    8.91    0.59
   2  -2  -4    9.09    0.73
   2  -2  -4    8.57    0.67
   2  -2  -4    8.85    1.07
  -2   2   4    9.93    0.61
  -2   2   4    9.38    0.88
  -2   2   4    9.01    0.85
   1  -2  -4   21.58    1.21
   1  -2  -4   22.53    1.24
   1  -2  -4   24.43    1.45
   1  -2  -4   18.23    1.15
   1  -2  -4   23.06    1.23
  -1   2   4   24.28    1.25
  -1   2   4   24.20    1.23
   0  -2  -4   33.83    1.84
   0  -2  -4   33.72    1.69
   0  -2  -4   35.10    1.81
   0  -2  -4   32.84    1.79
   0  -2  -4   34.28    2.01
   0   2   4   35.88    1.38
   0   2   4   36.40    1.84
   0   2   4   37.26    1.83
   0   2   4   33.38    1.84
   0   2   4   39.53    2.10
  -1  -2  -4   32.33    1.87
  -1  -2  -4   32.05    1.75
  -1  -2  -4   32.03    1.72
  -1  -2  -4   31.46    1.79
   1   2   4   31.71    1.84
   1   2   4   34.91    1.80
   1   2   4   31.46    1.75
  -2  -2  -4   33.51    1.94
  -2  -2  -4   30.84    2.03
  -2  -2  -4   32.26    1.78
  -2  -2  -4   34.57    1.87
   2   2   4   32.48    1.97
   2   2   4   35.33    1.96
   2   2   4   33.46    1.82
  -3  -2  -4  136.86    5.42
  -3  -2  -4  141.51    5.25
   3   2   4  127.71    5.28
   3   2   4  125.39    5.40
   3   2   4  139.22    5.18
  -4  -2  -4    0.21    0.39
  -4  -2  -4    0.90    0.53
   4   2   4    0.43    0.41
   4   2   4    1.70    0.65
  -5  -2  -4    0.63    0.51
  -5  -2  -4    0.64    0.54
   5   2   4    0.01    0.39
   5   2   4    0.68    0.54
  -6  -2  -4   26.63    2.82
   6   2   4   23.93    2.48
  -7  -2  -4    0.66    0.84
   7   2   4    0.69    0.88
  10  -3  -4    0.59    0.54
 -10   3   4   -0.02    0.62
   9  -3  -4    8.41    1.34
  -9   3   4   11.44    1.93
   8  -3  -4    6.75    1.11
   8  -3  -4    5.49    1.08
  -8   3   4    6.75    1.42
   7  -3  -4  233.52    8.04
   7  -3  -4  218.49    8.10
  -7   3   4  223.76    8.81
  -7   3   4  218.13    7.93
   6  -3  -4   31.48    1.85
   6  -3  -4   34.08    1.94
  -6   3   4   32.73    2.29
  -6   3   4   31.34    1.93
   5  -3  -4    2.96    0.57
   5  -3  -4    3.69    0.69
  -5   3   4    1.84    0.60
  -5   3   4    3.22    0.68
   4  -3  -4   16.33    1.05
   4  -3  -4   13.95    0.83
   4  -3  -4   14.50    1.05
  -4   3   4   14.66    1.20
  -4   3   4   13.20    1.20
   3  -3  -4   39.33    1.71
   3  -3  -4   38.50    1.87
   3  -3  -4   40.43    1.57
   3  -3  -4   39.47    1.69
  -3   3   4   41.38    2.09
  -3   3   4   40.67    1.53
  -3   3   4   31.20    1.96
   2  -3  -4    2.25    0.39
   2  -3  -4    3.00    0.48
   2  -3  -4    1.80    0.45
   2  -3  -4    2.23    0.49
   2  -3  -4    3.15    0.49
  -2   3   4    3.41    0.72
  -2   3   4    2.65    0.44
  -2   3   4    3.49    0.67
   1  -3  -4   18.76    1.24
   1  -3  -4   23.14    1.35
   1  -3  -4   22.12    1.47
   1  -3  -4   22.08    1.36
   1  -3  -4   23.85    1.30
  -1   3   4   24.06    1.33
  -1   3   4   22.52    1.47
   0  -3  -4  173.66    6.11
   0  -3  -4  164.43    6.27
   0  -3  -4  168.73    6.26
   0  -3  -4  181.79    6.35
   0  -3  -4  176.23    6.20
   0   3   4  167.87    6.17
   0   3   4  173.97    6.10
   0   3   4  181.37    6.27
   0   3   4  186.36    6.38
   0   3   4  173.81    6.30
   0   3   4  173.64    6.10
  -1  -3  -4   29.30    1.89
  -1  -3  -4   28.54    1.74
  -1  -3  -4   29.45    1.75
  -1  -3  -4   30.38    1.73
   1   3   4   30.11    1.83
   1   3   4   29.57    1.77
   1   3   4   27.28    1.68
   1   3   4   29.15    1.68
  -2  -3  -4   31.63    3.65
  -2  -3  -4   29.84    1.96
  -2  -3  -4   35.48    2.00
   2   3   4   34.48    2.03
   2   3   4   32.71    1.89
   2   3   4   34.24    2.02
   2   3   4   29.96    2.52
  -3  -3  -4    4.88    0.99
  -3  -3  -4    6.50    1.05
   3   3   4    6.44    1.10
   3   3   4    6.47    0.97
   3   3   4    5.82    1.07
  -4  -3  -4   12.30    1.63
  -4  -3  -4   12.64    1.52
   4   3   4   10.93    1.38
   4   3   4   12.21    1.65
  -5  -3  -4   53.10    3.31
  -5  -3  -4   53.08    3.05
   5   3   4   55.01    3.26
   5   3   4   51.60    2.95
  -6  -3  -4   36.82    2.94
  -6  -3  -4   37.82    2.62
   6   3   4   36.42    2.81
   6   3   4   35.12    2.47
  10  -4  -4   11.34    1.75
 -10   4   4    8.12    1.83
   9  -4  -4   48.67    3.06
   9  -4  -4   55.35    3.15
  -9   4   4   53.72    3.73
   8  -4  -4   48.14    2.83
   8  -4  -4   47.69    2.77
  -8   4   4   54.84    3.50
   7  -4  -4    0.22    0.36
   7  -4  -4   -0.04    0.30
  -7   4   4    0.41    0.36
  -7   4   4    0.61    0.55
   6  -4  -4    4.25    0.80
   6  -4  -4    4.39    0.79
  -6   4   4    4.21    0.83
  -6   4   4    5.53    1.10
   5  -4  -4   59.56    2.75
   5  -4  -4   53.82    2.58
  -5   4   4   58.95    3.06
  -5   4   4   63.64    3.04
   4  -4  -4   19.18    0.99
   4  -4  -4   20.42    1.06
   4  -4  -4   21.24    1.37
   4  -4  -4   22.71    1.25
  -4   4   4   19.12    1.48
  -4   4   4   18.91    0.97
  -4   4   4   21.25    1.52
   3  -4  -4   29.62    1.46
   3  -4  -4   31.54    1.43
   3  -4  -4   27.45    1.64
   3  -4  -4   32.46    1.51
   3  -4  -4   29.47    1.44
  -3   4   4   29.05    1.42
  -3   4   4   30.04    1.87
  -3   4   4   31.70    1.78
   2  -4  -4  296.84    9.91
   2  -4  -4  293.65    9.82
   2  -4  -4  301.95   10.08
   2  -4  -4  300.89   10.47
   2  -4  -4  329.24   10.04
  -2   4   4  299.05    9.86
  -2   4   4  315.02   10.18
  -2   4   4  296.35   10.35
   1  -4  -4   33.41    2.03
   1  -4  -4   34.95    1.92
   1  -4  -4   32.47    1.84
   1  -4  -4   34.86    1.77
  -1   4   4   33.65    1.81
  -1   4   4   34.51    2.00
  -1   4   4   33.95    1.58
   0  -4  -4   25.20    1.51
   0  -4  -4   20.57    1.46
   0  -4  -4   24.45    1.64
   0   4   4   23.01    1.55
   0   4   4   23.83    1.59
   0   4   4   24.18    1.58
   0   4   4   21.07    1.39
  -1  -4  -4   74.69    3.25
  -1  -4  -4   71.29    3.47
  -1  -4  -4   72.22    3.31
   1   4   4   68.03    3.35
   1   4   4   73.66    3.32
   1   4   4   71.34    3.17
  -2  -4  -4    0.50    0.44
  -2  -4  -4    0.62    0.50
   2   4   4    0.29    0.43
   2   4   4    0.27    0.36
  -3  -4  -4   47.38    2.85
  -3  -4  -4   43.84    2.57
   3   4   4   40.70    2.44
   3   4   4   44.69    2.69
  -4  -4  -4   13.89    1.74
  -4  -4  -4   10.22    1.57
   4   4   4   13.89    1.82
   4   4   4   13.47    1.67
  -5  -4  -4   20.41    2.42
  -5  -4  -4   27.54    2.21
   5   4   4   25.28    2.06
   5   4   4   29.69    2.41
  -6  -4  -4    2.38    0.89
  -6  -4  -4    1.06    1.12
   6   4   4    2.20    1.07
   6   4   4    1.23    0.73
  10  -5  -4   18.35    2.28
  10  -5  -4   16.67    2.12
 -10   5   4   19.45    2.76
   9  -5  -4    5.91    1.20
   9  -5  -4    4.72    1.10
  -9   5   4    6.04    1.49
   8  -5  -4    6.87    1.24
   8  -5  -4    9.43    1.39
  -8   5   4    7.23    1.47
   7  -5  -4   35.46    2.23
   7  -5  -4   35.17    2.17
  -7   5   4   34.58    2.58
  -7   5   4   36.05    2.38
   6  -5  -4    1.18    0.47
   6  -5  -4    1.95    0.61
  -6   5   4    1.27    0.58
  -6   5   4    1.62    0.56
   5  -5  -4   60.21    2.88
   5  -5  -4   58.99    2.69
  -5   5   4   60.65    3.12
  -5   5   4   58.93    3.10
   4  -5  -4   51.05    2.25
   4  -5  -4   53.66    2.58
   4  -5  -4   51.11    2.10
  -4   5   4   51.55    2.64
  -4   5   4   47.62    2.13
   3  -5  -4   22.06    1.32
   3  -5  -4   21.11    1.46
   3  -5  -4   19.10    1.07
   3  -5  -4   18.74    1.16
  -3   5   4   17.26    1.48
  -3   5   4   18.13    1.19
  -3   5   4   18.21    1.33
   2  -5  -4   26.86    1.67
   2  -5  -4   34.15    1.91
   2  -5  -4   30.97    1.67
   2  -5  -4   34.44    1.88
  -2   5   4   28.29    1.82
  -2   5   4   30.31    1.97
  -2   5   4   32.96    1.76
   1  -5  -4   47.82    2.48
   1  -5  -4   46.27    2.29
   1  -5  -4   46.23    2.44
  -1   5   4   49.03    2.32
  -1   5   4   47.30    2.40
   0  -5  -4   35.88    2.05
   0  -5  -4   36.22    2.26
   0  -5  -4   37.09    2.15
   0   5   4   38.13    2.06
   0   5   4   38.76    2.24
  -1  -5  -4   19.32    1.59
  -1  -5  -4   20.13    1.58
   1   5   4   20.88    1.62
   1   5   4   20.07    1.49
  -2  -5  -4   91.18    4.20
  -2  -5  -4   88.79    4.14
   2   5   4   94.95    4.24
   2   5   4   87.89    4.04
  -3  -5  -4    0.18    0.54
  -3  -5  -4   -0.24    0.34
   3   5   4    0.19    0.40
   3   5   4    0.22    0.47
  -4  -5  -4    9.08    1.62
  -4  -5  -4    8.40    1.42
   4   5   4   10.29    1.63
   4   5   4    9.59    1.47
  -5  -5  -4    8.49    1.49
  -5  -5  -4   12.10    1.93
   5   5   4    8.80    1.72
   5   5   4   11.14    1.60
  10  -6  -4    8.66    1.57
  10  -6  -4   14.30    2.05
 -10   6   4   10.56    2.06
   9  -6  -4   24.42    2.10
   9  -6  -4   26.35    2.15
  -9   6   4   21.78    2.69
   8  -6  -4   10.76    1.50
   8  -6  -4   10.10    1.46
  -8   6   4    9.54    1.64
   7  -6  -4  173.49    6.68
   7  -6  -4  170.13    6.83
  -7   6   4  184.00    7.46
  -7   6   4  173.88    7.12
   6  -6  -4   57.11    3.01
   6  -6  -4   57.06    2.81
  -6   6   4   61.64    3.34
  -6   6   4   55.70    3.22
   5  -6  -4   15.60    1.18
   5  -6  -4   14.72    1.60
  -5   6   4   14.86    1.50
  -5   6   4   14.16    1.39
   4  -6  -4   -0.07    0.21
   4  -6  -4    0.02    0.25
  -4   6   4    0.03    0.30
  -4   6   4    0.17    0.30
   3  -6  -4   23.85    1.69
   3  -6  -4   22.07    1.36
   3  -6  -4   24.95    1.62
  -3   6   4   24.70    1.57
  -3   6   4   23.32    1.83
  -3   6   4   22.43    1.48
   2  -6  -4   93.52    4.03
   2  -6  -4   97.91    4.13
   2  -6  -4   93.15    3.80
  -2   6   4   98.95    3.82
  -2   6   4   93.90    3.98
  -2   6   4   94.86    3.79
   1  -6  -4    1.54    0.57
   1  -6  -4    2.95    0.71
   1  -6  -4    2.16    0.61
  -1   6   4    2.27    0.62
  -1   6   4    3.04    0.66
   0  -6  -4    0.63    0.47
   0  -6  -4    0.22    0.41
   0   6   4    0.06    0.29
  -1  -6  -4   -0.47    0.28
  -1  -6  -4    0.13    0.36
   1   6   4   -0.17    0.24
  -2  -6  -4  134.95    5.80
  -2  -6  -4  138.93    5.86
   2   6   4  137.19    5.71
   2   6   4  143.61    5.90
  -3  -6  -4   59.81    3.44
  -3  -6  -4   60.01    3.53
   3   6   4   61.83    3.39
   3   6   4   61.51    3.48
  -4  -6  -4    0.98    0.73
  -4  -6  -4   -0.65    0.66
   4   6   4    0.22    0.84
   4   6   4    0.18    0.48
  -5  -6  -4   -0.29    0.63
  -5  -6  -4   -0.45    0.77
   5   6   4   -0.10    0.78
   5   6   4    0.28    0.61
   9  -7  -4    0.16    0.55
   9  -7  -4    0.31    0.50
  -9   7   4    0.07    0.57
   8  -7  -4   47.66    2.79
   8  -7  -4   45.96    2.94
  -8   7   4   45.65    3.25
   7  -7  -4    1.04    0.53
   7  -7  -4    0.40    0.45
  -7   7   4    1.11    0.58
   6  -7  -4   95.51    4.07
   6  -7  -4  100.46    4.48
  -6   7   4   92.22    4.69
  -6   7   4   95.14    4.57
   5  -7  -4  180.00    6.48
   5  -7  -4  176.90    6.95
  -5   7   4  182.42    6.99
   4  -7  -4   23.38    1.76
  -4   7   4   20.45    1.91
   3  -7  -4   34.20    2.16
   3  -7  -4   30.79    1.79
  -3   7   4   32.08    1.98
   2  -7  -4   15.26    1.65
   2  -7  -4   14.06    1.36
   2  -7  -4   14.88    1.23
  -2   7   4   13.22    1.30
  -2   7   4   14.96    1.22
   1  -7  -4    2.32    0.77
   1  -7  -4    1.30    0.54
  -1   7   4    1.27    0.53
   0  -7  -4   38.34    2.52
   0  -7  -4   35.16    2.30
   0   7   4   39.48    2.32
  -1  -7  -4   54.89    3.07
  -1  -7  -4   53.64    3.10
   1   7   4   51.47    2.92
  -2  -7  -4    8.81    1.47
  -2  -7  -4    9.36    1.58
   2   7   4    9.00    1.43
  -3  -7  -4    6.55    1.47
  -3  -7  -4    6.66    1.33
   3   7   4    4.40    1.09
  -4  -7  -4    2.72    1.08
  -4  -7  -4    4.68    1.33
   4   7   4    4.55    1.30
   4   7   4    4.16    1.10
   9  -8  -4   11.03    1.63
   9  -8  -4    9.12    1.54
  -9   8   4    8.70    1.72
   8  -8  -4   25.18    2.13
   8  -8  -4   24.29    1.97
  -8   8   4   25.30    2.39
   7  -8  -4   25.68    2.10
   7  -8  -4   26.45    1.93
  -7   8   4   26.62    2.28
   6  -8  -4    8.96    1.39
   6  -8  -4    8.44    1.15
  -6   8   4    7.06    1.46
   5  -8  -4    0.32    0.41
   4  -8  -4  321.73   11.40
   3  -8  -4    6.50    0.94
   3  -8  -4    7.88    1.28
  -3   8   4    8.61    1.20
   2  -8  -4   63.48    3.13
   2  -8  -4   65.07    3.48
  -2   8   4   70.37    3.18
   1  -8  -4   94.72    4.34
   1  -8  -4  100.44    4.63
  -1   8   4  101.77    4.34
   0  -8  -4    0.45    0.53
   0  -8  -4    1.50    0.68
   0   8   4    0.51    0.47
  -1  -8  -4    6.76    1.35
  -1  -8  -4    8.51    1.53
   1   8   4    8.45    1.42
  -2  -8  -4    1.02    0.86
  -2  -8  -4    1.02    0.84
   2   8   4    2.02    0.82
  -3  -8  -4   21.86    2.67
  -3  -8  -4   13.97    2.04
   3   8   4   16.02    2.15
   9  -9  -4   37.64    3.00
   9  -9  -4   41.81    2.80
  -9   9   4   41.76    3.33
   8  -9  -4   22.10    2.49
   8  -9  -4   26.15    2.09
  -8   9   4   30.83    2.65
   7  -9  -4    1.25    0.68
   7  -9  -4    0.84    0.53
   6  -9  -4    4.38    1.08
   5  -9  -4   27.08    2.15
   4  -9  -4   16.80    1.95
  -4   9   4   16.35    1.79
   3  -9  -4    8.52    1.37
   2  -9  -4    2.37    0.86
   2  -9  -4    2.08    0.70
  -2   9   4    2.17    0.68
   1  -9  -4   38.14    2.70
   1  -9  -4   41.08    2.60
  -1   9   4   46.86    2.66
   0  -9  -4    7.33    1.34
   0  -9  -4    7.28    1.53
   0   9   4    6.50    1.22
  -1  -9  -4    0.58    0.68
  -1  -9  -4    0.01    0.60
   1   9   4    0.11    0.53
  -2  -9  -4    1.28    0.91
  -2  -9  -4    0.60    0.71
   2   9   4    1.00    0.67
   8 -10  -4    5.42    1.18
   8 -10  -4    5.76    1.31
   7 -10  -4    3.02    0.97
   6 -10  -4   29.50    2.42
   5 -10  -4    0.04    0.44
   4 -10  -4    2.15    0.79
   3 -10  -4    1.44    0.75
   2 -10  -4   24.21    1.96
   2 -10  -4   26.87    2.25
  -2  10   4   25.92    1.96
   1 -10  -4   12.97    1.74
   1 -10  -4   12.63    1.88
  -1  10   4   10.38    1.56
   0 -10  -4    8.41    1.69
   0 -10  -4    8.38    1.53
   0  10   4    6.33    1.34
  -1 -10  -4   12.50    1.99
  -1 -10  -4   13.50    2.01
   1  10   4   13.45    2.00
   7 -11  -4    9.57    1.77
   6 -11  -4   11.35    1.82
   5 -11  -4   13.27    2.03
   4 -11  -4   16.91    2.16
   3 -11  -4   33.79    2.71
   2 -11  -4    1.48    0.73
   2 -11  -4    1.24    0.89
  -2  11   4    1.36    0.69
   1 -11  -4    4.54    1.21
   1 -11  -4    4.97    1.33
  -1  11   4    6.03    1.29
   0 -11  -4    4.88    1.21
   0 -11  -4    7.64    1.71
   0  11   4    2.91    1.01
   5 -12  -4   35.94    2.97
   4 -12  -4   14.55    2.24
   3 -12  -4    0.31    0.70
   0  12  -5    1.80    0.87
   1 -12   5   71.61    3.93
   2 -12   5    3.03    1.03
   3 -12   5   54.59    3.33
   4 -12   5   30.42    2.52
   2  11  -5    2.50    1.01
   1  11  -5   13.78    1.92
   0  11  -5    8.14    1.41
   1 -11   5   -0.28    0.49
   2 -11   5   13.20    1.77
   3 -11   5    0.20    0.53
   4 -11   5   35.73    2.64
   5 -11   5   41.87    2.87
   5 -11   5   47.84    3.09
   3  10  -5   40.72    3.00
   2  10  -5   11.10    1.70
   1  10  -5    0.58    0.58
   0  10  -5    2.20    0.84
  -1  10  -5    1.40    0.69
   2 -10   5    1.02    0.64
   3 -10   5  132.50    5.71
   4 -10   5   36.38    2.56
   4 -10   5   35.71    2.43
   5 -10   5   -0.13    0.42
   5 -10   5    0.79    0.64
   6 -10   5    0.14    0.58
   6 -10   5   -0.33    0.46
   5   9  -5   15.78    2.25
   4   9  -5   19.35    2.28
   3   9  -5    4.70    1.19
   2   9  -5   17.23    1.99
   1   9  -5    1.16    0.64
   0   9  -5   48.72    2.79
  -1   9  -5   48.05    2.71
   2  -9   5   27.22    2.00
   3  -9   5    0.16    0.41
   3  -9   5   -0.04    0.47
   4  -9   5    1.19    0.57
   4  -9   5    0.77    0.61
   5  -9   5    1.56    0.73
   5  -9   5    2.25    0.83
   6  -9   5    0.08    0.53
   6  -9   5    0.00    0.48
   7  -9   5    5.94    1.32
   7  -9   5    4.28    1.22
   5   8  -5   -0.05    0.53
   4   8  -5   22.79    2.41
   3   8  -5    1.30    0.65
   2   8  -5    5.08    1.05
   1   8  -5   14.86    1.74
   0   8  -5   63.25    3.16
  -1   8  -5   24.11    1.67
  -2   8  -5    1.04    0.81
   2  -8   5    0.90    0.46
   2  -8   5    1.60    0.60
   3  -8   5   16.55    1.77
   3  -8   5   18.57    1.75
   3  -8   5   17.46    1.45
  -4   8  -5   68.36    4.14
   4  -8   5   69.31    3.52
   4  -8   5   64.85    3.36
   5  -8   5   29.09    2.15
   5  -8   5   26.64    2.08
   6  -8   5    3.59    1.05
   6  -8   5    3.81    0.98
   7  -8   5    6.38    1.38
   7  -8   5    4.90    1.13
   6   7  -5    0.03    0.53
   5   7  -5   10.69    1.65
   4   7  -5   45.59    2.89
   3   7  -5   23.59    1.87
   2   7  -5    0.53    0.49
   1   7  -5    8.33    1.14
   0   7  -5   95.21    4.04
  -1   7  -5   24.98    1.61
   1  -7   5   25.46    1.77
  -2   7  -5   25.48    1.58
   2  -7   5   27.05    1.83
   2  -7   5   23.79    1.83
   2  -7   5   23.67    1.56
  -3   7  -5  164.21    7.11
   3  -7   5  174.73    6.81
   3  -7   5  161.61    6.20
   3  -7   5  158.42    6.29
  -4   7  -5   37.73    2.81
   4  -7   5   35.12    2.24
   4  -7   5   35.43    2.60
   4  -7   5   36.31    2.31
   5  -7   5   32.12    2.27
   5  -7   5   30.01    2.14
   6  -7   5   24.84    2.02
   6  -7   5   25.02    2.14
   7  -7   5    6.55    1.29
   7  -7   5    6.54    1.38
   7   6  -5   10.74    1.74
   6   6  -5    0.50    0.66
   6   6  -5    0.69    0.62
   5   6  -5    4.67    1.04
   5   6  -5    4.45    1.05
   4   6  -5   24.63    1.91
   3   6  -5   10.43    1.34
   2   6  -5   41.35    2.33
   1   6  -5  127.24    5.30
   1   6  -5  121.75    4.88
   0   6  -5    8.67    1.25
   0   6  -5   10.50    1.18
   0  -6   5   10.57    1.22
  -1   6  -5   96.43    4.42
  -1   6  -5   81.29    3.53
   1  -6   5   89.16    3.46
   1  -6   5   88.62    3.90
  -2   6  -5   15.52    1.13
  -2   6  -5   15.45    1.97
   2  -6   5   14.85    1.16
   2  -6   5   15.00    1.40
   2  -6   5   13.53    1.44
  -3   6  -5    0.98    0.55
   3  -6   5    0.97    0.49
   3  -6   5    0.85    0.53
   3  -6   5    0.81    0.45
  -4   6  -5   85.71    4.40
   4  -6   5   77.65    3.78
   4  -6   5   85.81    3.86
   4  -6   5   85.08    4.35
  -5   6  -5   83.73    5.01
   5  -6   5   87.78    4.16
   5  -6   5   83.83    3.95
   6  -6   5    0.00    0.35
   6  -6   5   -0.01    0.43
   7  -6   5   10.82    1.65
   7  -6   5    9.42    1.68
   7   5  -5   18.20    2.13
   7   5  -5   14.41    1.89
   6   5  -5   13.63    1.70
   6   5  -5   14.24    1.79
   5   5  -5    9.77    1.45
   5   5  -5   11.52    1.43
   4   5  -5    1.21    0.52
   4   5  -5    1.85    0.65
   4   5  -5    0.87    0.51
   3   5  -5  216.15    8.04
   3   5  -5  220.09    7.88
   2   5  -5  139.99    5.58
   2   5  -5  138.99    5.33
   1   5  -5   36.74    2.00
   1   5  -5   35.96    2.17
  -1  -5   5   38.67    2.12
   0   5  -5  170.74    6.81
   0   5  -5  176.03    6.24
   0   5  -5  182.31    6.71
   0  -5   5  177.18    6.46
  -1   5  -5    0.04    0.21
  -1   5  -5    0.00    0.30
  -1   5  -5   -0.18    0.24
   1  -5   5   -0.48    0.21
   1  -5   5    0.36    0.27
  -2   5  -5  195.47    7.55
  -2   5  -5  196.08    7.76
  -2   5  -5  200.60    6.87
   2  -5   5  210.05    7.05
   2  -5   5  198.40    7.51
   2  -5   5  210.88    7.23
  -3   5  -5    0.43    0.32
  -3   5  -5    0.50    0.40
   3  -5   5    0.76    0.44
   3  -5   5    0.50    0.41
   3  -5   5    0.86    0.43
  -4   5  -5   13.45    1.78
   4  -5   5   14.67    1.56
   4  -5   5   11.59    1.39
   4  -5   5   11.69    1.68
  -5   5  -5   13.79    1.88
   5  -5   5   10.85    1.49
   5  -5   5   11.12    1.38
   6  -5   5   22.46    1.78
   6  -5   5   19.87    2.19
   7  -5   5    2.06    0.84
   7  -5   5    0.71    0.64
   8   4  -5   39.38    2.72
   7   4  -5    6.43    1.23
   7   4  -5    5.23    1.13
   6   4  -5   30.95    2.18
   6   4  -5   29.51    2.05
   5   4  -5  101.37    4.43
   5   4  -5   97.92    4.31
  -5  -4   5  103.71    4.67
   4   4  -5    6.31    0.98
   4   4  -5    8.38    1.12
   4   4  -5    6.23    1.00
  -4  -4   5    7.34    1.12
   3   4  -5    3.10    0.67
   3   4  -5    3.36    0.72
  -3  -4   5    4.00    0.86
   2   4  -5   15.53    1.18
   2   4  -5   15.49    1.25
   1   4  -5   48.58    2.38
   1   4  -5   54.02    2.62
   1   4  -5   52.08    2.71
  -1  -4   5   53.70    2.82
  -1  -4   5   56.47    2.73
   0   4  -5   17.29    1.17
   0   4  -5   19.86    1.43
   0   4  -5   18.86    1.49
   0  -4   5   17.82    1.38
  -1   4  -5  247.05    8.71
  -1   4  -5  238.73    8.00
  -1   4  -5  235.78    8.48
   1  -4   5  243.39    8.51
   1  -4   5  235.35    7.90
  -2   4  -5    4.68    0.95
  -2   4  -5    3.38    0.74
  -2   4  -5    5.04    0.72
   2  -4   5    3.56    0.80
   2  -4   5    4.14    0.69
   2  -4   5    4.31    0.75
  -3   4  -5   15.58    1.09
  -3   4  -5   18.64    1.59
   3  -4   5   15.40    1.49
   3  -4   5   18.27    1.30
   3  -4   5   17.68    1.34
  -4   4  -5   19.61    1.70
   4  -4   5   19.06    1.43
   4  -4   5   17.10    1.46
   4  -4   5   18.42    2.13
  -5   4  -5    9.70    1.42
   5  -4   5    9.93    1.31
   5  -4   5    7.93    1.25
   6  -4   5    0.49    0.43
   6  -4   5   -0.17    0.44
   7  -4   5    0.10    0.43
   7  -4   5    0.79    0.70
   8   3  -5   70.67    3.79
   7   3  -5   34.46    2.36
   7   3  -5   35.67    2.37
  -7  -3   5   34.69    2.64
   6   3  -5   22.40    1.69
   6   3  -5   17.99    1.78
  -6  -3   5   19.16    1.82
   5   3  -5    1.20    0.53
   5   3  -5    0.16    0.51
  -5  -3   5    0.81    0.52
   4   3  -5    0.95    0.37
   4   3  -5    0.50    0.38
   4   3  -5    0.83    0.38
  -4  -3   5    0.94    0.40
  -4  -3   5    1.00    0.47
   3   3  -5   11.23    1.17
   3   3  -5   12.49    1.25
   3   3  -5   12.16    1.03
  -3  -3   5   12.29    1.02
  -3  -3   5   11.77    1.15
   2   3  -5    0.02    0.12
   2   3  -5    0.15    0.22
   2   3  -5   -0.03    0.18
   2   3  -5   -0.07    0.22
  -2  -3   5    0.63    0.46
  -2  -3   5    0.10    0.19
   1   3  -5   58.67    2.56
   1   3  -5   64.85    2.90
   1   3  -5   61.43    2.72
  -1  -3   5   51.80    2.92
  -1  -3   5   62.12    2.69
   0   3  -5   34.74    1.90
   0   3  -5   38.06    2.09
   0   3  -5   31.54    1.66
   0  -3   5   33.78    1.84
   0  -3   5   33.35    1.97
  -1   3  -5   31.37    1.81
  -1   3  -5   22.70    1.69
  -1   3  -5   30.16    1.52
   1  -3   5   29.45    1.85
   1  -3   5   27.69    1.44
  -2   3  -5  150.01    5.79
  -2   3  -5  141.90    5.69
  -2   3  -5  146.10    5.17
   2  -3   5  144.35    5.28
   2  -3   5  151.25    5.87
   2  -3   5  147.18    5.33
  -3   3  -5    0.46    0.39
  -3   3  -5    0.45    0.37
  -3   3  -5    0.27    0.27
   3  -3   5    0.65    0.32
   3  -3   5    0.02    0.31
   3  -3   5    0.73    0.39
  -4   3  -5  194.54    7.22
   4  -3   5  182.73    6.70
   4  -3   5  191.27    7.60
   4  -3   5  176.96    6.95
  -5   3  -5    0.87    0.49
   5  -3   5    0.50    0.38
   5  -3   5    0.82    0.56
   6  -3   5    4.28    0.92
   6  -3   5    5.37    1.15
   7  -3   5    1.94    0.89
   9   2  -5    2.60    0.97
  -9  -2   5    3.71    1.32
   8   2  -5    2.55    0.83
  -8  -2   5    3.13    1.05
   7   2  -5    0.83    0.48
   7   2  -5    0.54    0.42
  -7  -2   5    0.98    0.57
   6   2  -5  242.78    8.87
   6   2  -5  248.81    8.81
  -6  -2   5  256.15    9.43
   5   2  -5   12.12    1.26
   5   2  -5   10.89    1.26
  -5  -2   5   12.19    1.52
   4   2  -5   99.38    3.75
   4   2  -5  100.50    3.92
   4   2  -5  100.89    3.94
  -4  -2   5   90.44    4.12
  -4  -2   5   96.75    3.71
   3   2  -5    0.29    0.27
   3   2  -5   -0.01    0.17
   3   2  -5   -0.14    0.13
  -3  -2   5   -0.06    0.25
  -3  -2   5    0.11    0.17
   2   2  -5    9.78    1.00
   2   2  -5    8.32    0.91
   2   2  -5    9.04    0.76
  -2  -2   5    8.35    0.72
  -2  -2   5   11.08    1.48
   1   2  -5  208.56    6.95
   1   2  -5  199.95    6.97
  -1  -2   5  210.08    6.97
   0   2  -5    1.13    0.40
   0   2  -5    0.55    0.35
   0   2  -5    0.96    0.31
   0  -2   5    0.34    0.39
   0  -2   5    0.99    0.37
  -1   2  -5    0.36    0.29
  -1   2  -5    1.15    0.44
  -1   2  -5    0.68    0.30
   1  -2   5    1.08    0.39
   1  -2   5    1.18    0.49
   1  -2   5    1.13    0.35
  -2   2  -5   56.58    2.52
  -2   2  -5   62.18    2.98
  -2   2  -5   58.43    2.95
   2  -2   5   65.13    2.73
   2  -2   5   59.63    3.05
   2  -2   5   60.71    2.56
  -3   2  -5   25.58    1.50
  -3   2  -5   24.57    1.89
  -3   2  -5   23.87    1.71
   3  -2   5   26.05    1.50
   3  -2   5   27.54    1.99
   3  -2   5   29.02    1.75
  -4   2  -5    0.00    0.26
  -4   2  -5   -0.18    0.32
   4  -2   5   -0.13    0.35
   4  -2   5    0.16    0.23
   4  -2   5    0.06    0.38
  -5   2  -5   31.71    2.97
   5  -2   5   29.71    1.86
   5  -2   5   28.85    2.14
   6  -2   5   53.66    3.25
   7  -2   5   19.84    2.32
   9   1  -5   30.16    2.36
  -9  -1   5   27.47    2.69
   8   1  -5   18.42    1.99
  -8  -1   5   18.09    2.34
   7   1  -5    3.21    0.81
  -7  -1   5    4.20    1.07
   6   1  -5    1.45    0.56
  -6  -1   5    1.93    0.71
   5   1  -5    7.81    0.95
   5   1  -5    5.89    0.87
  -5  -1   5    5.52    0.99
   4   1  -5   17.52    1.17
   4   1  -5   17.00    1.21
   4   1  -5   15.89    0.95
  -4  -1   5   17.35    0.98
  -4  -1   5   16.40    1.36
   3   1  -5  339.41   11.05
   3   1  -5  334.28   11.05
   3   1  -5  355.00   10.82
  -3  -1   5  327.87   10.73
  -3  -1   5  354.46   11.53
   2   1  -5  143.64    5.15
   2   1  -5  150.58    5.18
   2   1  -5  146.78    5.02
  -2  -1   5  145.28    4.99
  -2  -1   5  153.40    5.94
   1   1  -5    1.60    0.34
  -1  -1   5    2.58    0.73
   0   1  -5  466.91   14.71
   0   1  -5  468.28   14.89
   0   1  -5  473.16   15.13
   0   1  -5  469.01   14.77
   0  -1   5  449.69   14.81
   0  -1   5  475.41   15.16
  -1   1  -5  459.76   14.62
  -1   1  -5  451.81   14.95
  -1   1  -5  451.21   15.01
   1  -1   5  506.45   14.69
   1  -1   5  440.09   14.87
   1  -1   5  466.71   15.11
  -2   1  -5  209.38    7.85
  -2   1  -5  220.69    7.78
  -2   1  -5  221.48    7.46
   2  -1   5  227.24    8.07
   2  -1   5  225.46    7.60
   2  -1   5  213.06    7.25
  -3   1  -5    2.53    0.59
  -3   1  -5    3.90    0.81
   3  -1   5    5.00    0.90
   3  -1   5    2.70    0.53
   3  -1   5    2.51    0.73
  -4   1  -5  185.01    6.61
  -4   1  -5  189.89    6.81
   4  -1   5  176.52    7.39
   4  -1   5  183.52    6.95
   4  -1   5  177.20    6.41
   5  -1   5   24.54    1.97
  -6   1  -5   35.74    2.58
   6  -1   5   30.26    2.44
  -7   1  -5    2.57    1.03
   7  -1   5    2.87    1.04
   9   0  -5    1.37    0.78
  -9   0   5    0.82    0.71
   8   0  -5    0.00    0.42
  -8   0   5   -0.04    0.44
   7   0  -5   12.58    1.46
  -7   0   5   14.36    1.90
   6   0  -5  102.71    4.27
   6   0  -5  102.04    4.01
  -6   0   5  100.15    4.73
   5   0  -5   16.26    1.14
   5   0  -5   17.80    1.29
  -5   0   5   16.75    1.50
   4   0  -5   82.01    3.21
   4   0  -5   75.34    2.59
   4   0  -5   77.35    3.08
  -4   0   5   75.43    2.59
  -4   0   5   79.55    3.27
  -4   0   5   78.91    2.60
  -4   0   5   75.88    3.52
   3   0  -5  145.32    5.26
   3   0  -5  154.55    4.92
   3   0  -5  155.51    5.34
  -3   0   5  150.17    5.74
  -3   0   5  160.16    5.61
  -3   0   5  150.12    4.87
   2   0  -5  296.48    9.58
   2   0  -5  288.34    9.33
   2   0  -5  298.84    9.50
  -2   0   5  292.18   10.24
  -2   0   5  305.31    9.35
  -2   0   5  296.93    9.91
   1   0  -5    3.41    0.62
   1   0  -5    4.00    0.59
   1   0  -5    3.95    0.58
  -1   0   5    3.96    0.54
  -1   0   5    1.15    0.59
  -1   0   5    3.67    0.67
   0   0  -5  207.28    7.28
   0   0  -5  208.29    7.10
   0   0  -5  203.84    6.88
   0   0  -5  199.74    6.92
   0   0   5  203.43    6.86
   0   0   5  213.66    7.22
   0   0   5  215.27    7.37
   0   0   5  197.84    7.05
  -1   0  -5   22.77    1.42
  -1   0  -5   24.60    1.56
  -1   0  -5   22.09    1.34
  -1   0  -5   21.33    1.49
   1   0   5   21.99    1.37
   1   0   5   22.22    1.58
  -2   0  -5  107.84    4.52
  -2   0  -5  104.91    4.10
  -2   0  -5  105.75    4.22
   2   0   5  105.18    4.53
   2   0   5  108.64    3.78
   2   0   5  102.74    4.19
  -3   0  -5  170.55    6.05
  -3   0  -5  155.54    6.04
  -3   0  -5  162.79    6.23
   3   0   5  165.34    6.25
   3   0   5  169.96    6.65
  -4   0  -5    7.95    1.21
  -4   0  -5    7.59    1.11
  -4   0  -5    7.75    1.07
   4   0   5    6.70    1.25
   4   0   5    7.98    1.23
  -5   0  -5   31.07    2.32
  -5   0  -5   36.90    2.30
   5   0   5   36.42    2.47
  -6   0  -5    2.75    0.92
   6   0   5    2.70    0.99
  -7   0  -5    0.23    0.76
   7   0   5   -0.20    0.69
   9  -1  -5   17.75    2.11
  -9   1   5   27.22    2.58
   8  -1  -5   35.19    2.38
  -8   1   5   38.71    2.93
   7  -1  -5   46.68    2.57
  -7   1   5   43.09    2.95
   6  -1  -5    0.99    0.42
   6  -1  -5    0.17    0.32
  -6   1   5    0.75    0.32
  -6   1   5    0.41    0.42
   5  -1  -5  188.13    6.50
   5  -1  -5  191.64    6.83
   5  -1  -5  195.41    6.58
  -5   1   5  185.73    7.31
  -5   1   5  206.92    6.93
   4  -1  -5    9.21    0.96
   4  -1  -5    8.98    0.75
   4  -1  -5    9.99    0.73
  -4   1   5    9.78    0.93
  -4   1   5   11.09    1.35
   3  -1  -5    0.78    0.28
   3  -1  -5    1.32    0.20
   3  -1  -5    0.58    0.31
   3  -1  -5    1.35    0.19
  -3   1   5    1.04    0.40
  -3   1   5    0.88    0.16
  -3   1   5    1.02    0.43
   2  -1  -5   47.48    1.87
   2  -1  -5   46.87    2.06
   2  -1  -5   46.54    1.86
  -2   1   5   46.71    2.31
  -2   1   5   46.80    1.86
  -2   1   5   49.07    2.61
   1  -1  -5   13.22    1.12
   1  -1  -5   13.91    0.95
   1  -1  -5   15.15    1.00
   1  -1  -5   14.45    0.95
   1  -1  -5   12.52    0.94
  -1   1   5   16.30    1.19
  -1   1   5    9.87    0.89
  -1   1   5   16.40    0.99
   0  -1  -5  315.77   10.35
   0  -1  -5  310.10   10.34
   0  -1  -5  310.22   10.65
   0  -1  -5  317.01   10.49
   0  -1  -5  320.48   10.52
   0   1   5  334.83   10.69
   0   1   5  315.55   10.48
   0   1   5  320.02   10.66
  -1  -1  -5    0.37    0.33
  -1  -1  -5    0.50    0.29
  -1  -1  -5    0.52    0.34
  -1  -1  -5    0.76    0.39
   1   1   5    0.70    0.34
   1   1   5    0.64    0.35
   1   1   5    0.57    0.35
  -2  -1  -5   41.16    2.15
  -2  -1  -5   44.39    2.30
  -2  -1  -5   38.52    2.35
   2   1   5   39.64    2.38
   2   1   5   43.99    2.28
  -3  -1  -5   86.43    3.97
  -3  -1  -5   91.87    3.83
  -3  -1  -5   90.68    3.81
   3   1   5   88.83    3.99
   3   1   5   89.87    4.25
  -4  -1  -5   27.10    1.68
  -4  -1  -5   29.52    2.16
  -4  -1  -5   27.50    1.88
   4   1   5   32.86    2.39
   4   1   5   28.07    2.08
  -5  -1  -5   98.14    4.37
  -5  -1  -5  101.30    4.77
   5   1   5   93.28    4.64
  -6  -1  -5    2.76    0.99
   6   1   5    2.45    0.91
  10  -2  -5   41.11    2.94
 -10   2   5   45.65    3.67
   9  -2  -5    3.44    0.94
  -9   2   5    6.57    1.56
   8  -2  -5    0.77    0.49
  -8   2   5    1.07    0.65
   7  -2  -5   58.28    2.99
   7  -2  -5   64.11    3.21
  -7   2   5   55.87    3.44
  -7   2   5   56.94    2.76
   6  -2  -5  133.92    5.20
   6  -2  -5  136.09    5.00
  -6   2   5  146.67    5.91
  -6   2   5  122.96    5.13
   5  -2  -5   44.07    2.20
   5  -2  -5   43.90    2.07
   5  -2  -5   43.94    1.96
  -5   2   5   47.85    2.67
  -5   2   5   44.20    2.35
   4  -2  -5   14.07    0.98
   4  -2  -5   13.08    0.90
   4  -2  -5   14.30    1.02
  -4   2   5   14.94    1.21
  -4   2   5   15.02    1.30
   3  -2  -5   14.63    0.92
   3  -2  -5   12.58    0.64
   3  -2  -5   11.76    0.61
   3  -2  -5   12.17    0.85
   3  -2  -5   11.00    0.85
  -3   2   5   13.80    1.15
  -3   2   5   11.19    1.09
   2  -2  -5   80.79    3.19
   2  -2  -5   83.63    3.06
   2  -2  -5   82.04    3.05
   2  -2  -5   81.77    3.18
  -2   2   5   79.99    3.04
  -2   2   5   82.51    3.76
  -2   2   5   93.55    3.68
   1  -2  -5  100.67    3.74
   1  -2  -5   96.79    3.72
   1  -2  -5   98.34    3.71
   1  -2  -5   99.19    4.07
  -1   2   5   86.57    3.66
  -1   2   5  103.00    4.08
  -1   2   5   99.81    3.75
   0  -2  -5    0.08    0.26
   0  -2  -5    0.44    0.33
   0  -2  -5    0.45    0.27
   0  -2  -5    0.44    0.35
   0  -2  -5    0.73    0.40
   0   2   5    0.16    0.27
   0   2   5    0.65    0.20
   0   2   5    0.40    0.34
   0   2   5    0.22    0.27
   0   2   5    0.65    0.31
  -1  -2  -5   14.67    1.29
  -1  -2  -5   14.14    1.13
  -1  -2  -5   15.58    1.24
   1   2   5   11.99    1.19
   1   2   5   13.79    1.14
  -2  -2  -5   17.54    1.39
  -2  -2  -5   21.51    1.58
   2   2   5   19.62    1.58
   2   2   5   20.16    1.50
  -3  -2  -5   -0.28    0.37
  -3  -2  -5    0.67    0.45
   3   2   5   -0.32    0.27
   3   2   5    0.31    0.43
  -4  -2  -5    0.07    0.25
  -4  -2  -5    0.24    0.48
  -4  -2  -5    0.37    0.39
   4   2   5    0.01    0.44
  -5  -2  -5    3.62    1.09
  -5  -2  -5    3.97    0.95
   5   2   5    3.37    1.03
  -6  -2  -5    0.65    0.83
   6   2   5    0.66    0.81
  10  -3  -5   24.76    2.63
 -10   3   5   33.82    3.10
   9  -3  -5   12.01    1.65
  -9   3   5    8.73    1.74
   8  -3  -5    1.69    0.65
   8  -3  -5    3.66    1.09
  -8   3   5    2.02    0.89
   7  -3  -5   59.29    2.98
   7  -3  -5   58.04    2.88
  -7   3   5   57.03    2.95
  -7   3   5   61.19    3.56
   6  -3  -5  110.25    4.39
   6  -3  -5  106.65    4.26
  -6   3   5  107.61    4.94
  -6   3   5  107.37    4.56
   5  -3  -5   29.52    1.43
   5  -3  -5   28.84    1.63
   5  -3  -5   26.70    1.60
  -5   3   5   26.59    1.82
  -5   3   5   29.11    2.02
   4  -3  -5  120.58    4.37
   4  -3  -5  125.82    4.63
   4  -3  -5  121.39    4.48
  -4   3   5  126.68    5.02
  -4   3   5  128.05    5.07
   3  -3  -5   39.22    1.97
   3  -3  -5   40.46    1.69
   3  -3  -5   38.76    1.75
   3  -3  -5   38.40    1.64
  -3   3   5   40.59    2.25
  -3   3   5   39.85    2.21
  -3   3   5   43.39    1.67
   2  -3  -5    6.20    0.81
   2  -3  -5    7.97    0.88
   2  -3  -5    8.15    0.72
   2  -3  -5    9.06    0.76
  -2   3   5    7.45    1.20
  -2   3   5    8.86    0.72
  -2   3   5    8.42    1.19
   1  -3  -5    1.18    0.40
   1  -3  -5    2.30    0.58
   1  -3  -5    2.17    0.52
   1  -3  -5    2.18    0.52
   1  -3  -5    2.65    0.58
  -1   3   5    2.43    0.58
  -1   3   5    2.34    0.54
  -1   3   5    2.23    0.52
   0  -3  -5    6.29    0.93
   0  -3  -5    5.45    0.83
   0  -3  -5    6.79    1.02
   0   3   5    6.57    0.95
   0   3   5    8.10    1.06
   0   3   5    4.63    0.79
  -1  -3  -5    2.59    0.71
  -1  -3  -5    2.71    0.69
  -1  -3  -5    1.99    0.60
   1   3   5    2.60    0.67
   1   3   5    2.79    0.69
   1   3   5    3.59    0.78
  -2  -3  -5    3.63    0.85
  -2  -3  -5    2.97    0.69
   2   3   5    2.37    0.68
   2   3   5    4.26    0.94
  -3  -3  -5   59.27    3.25
  -3  -3  -5   56.83    3.01
   3   3   5   57.03    3.18
   3   3   5   56.24    3.10
  -4  -3  -5  118.93    5.35
  -4  -3  -5  115.04    5.01
   4   3   5  104.36    5.02
  -5  -3  -5   34.52    2.75
  -5  -3  -5   30.79    2.39
   5   3   5   34.31    2.61
  -6  -3  -5    9.11    2.08
  -6  -3  -5    9.50    1.94
   6   3   5   10.94    1.95
  10  -4  -5   25.81    2.70
 -10   4   5   34.24    3.11
   9  -4  -5   15.92    1.89
  -9   4   5   17.47    2.41
   8  -4  -5   13.75    1.55
   8  -4  -5   16.46    1.87
  -8   4   5   15.52    2.15
   7  -4  -5    0.77    0.47
   7  -4  -5    1.02    0.46
  -7   4   5    0.23    0.33
  -7   4   5    0.27    0.44
   6  -4  -5   39.78    2.17
   6  -4  -5   35.70    2.09
  -6   4   5   37.70    2.53
  -6   4   5   38.83    2.38
   5  -4  -5   26.16    1.66
   5  -4  -5   25.67    1.57
  -5   4   5   28.95    1.96
  -5   4   5   25.27    1.90
   4  -4  -5   16.36    1.11
   4  -4  -5   17.68    1.07
   4  -4  -5   18.40    1.30
  -4   4   5   18.50    1.52
  -4   4   5   16.39    1.40
   3  -4  -5   13.27    1.33
   3  -4  -5   11.79    0.85
   3  -4  -5   11.16    0.78
   3  -4  -5   11.86    0.89
  -3   4   5   13.73    1.28
  -3   4   5   11.30    0.82
  -3   4   5   11.64    1.12
   2  -4  -5  175.98    6.10
   2  -4  -5  168.82    6.03
   2  -4  -5  164.92    6.60
   2  -4  -5  165.43    5.99
   2  -4  -5  175.95    6.21
  -2   4   5  172.33    5.99
  -2   4   5  168.04    6.50
   1  -4  -5    9.50    1.19
   1  -4  -5    9.89    1.15
   1  -4  -5   11.12    1.18
  -1   4   5   11.33    1.72
  -1   4   5    8.76    1.06
  -1   4   5   10.47    0.98
  -1   4   5    9.36    1.20
   0  -4  -5   73.97    3.51
   0  -4  -5   80.14    3.46
   0  -4  -5   74.20    3.34
   0   4   5   75.68    3.45
   0   4   5   74.34    3.40
   0   4   5   76.87    3.32
  -1  -4  -5   17.58    1.44
  -1  -4  -5   17.19    1.50
   1   4   5   18.39    1.42
   1   4   5   16.40    1.74
  -2  -4  -5   -0.14    0.43
  -2  -4  -5    0.39    0.44
   2   4   5   -0.23    0.33
   2   4   5   -0.13    0.39
  -3  -4  -5   78.40    3.87
  -3  -4  -5   84.53    4.13
   3   4   5   77.08    3.75
   3   4   5   74.99    3.90
  -4  -4  -5   22.85    2.32
  -4  -4  -5   27.97    2.91
   4   4   5   21.36    2.20
   4   4   5   26.22    2.22
  -5  -4  -5    5.77    1.45
  -5  -4  -5    7.43    1.47
   5   4   5    5.49    1.38
  10  -5  -5   64.67    3.73
 -10   5   5   60.93    4.33
   9  -5  -5    0.94    0.61
   9  -5  -5    0.81    0.57
  -9   5   5    0.24    0.54
   8  -5  -5   24.56    1.95
   8  -5  -5   26.10    1.99
  -8   5   5   25.70    2.36
   7  -5  -5   15.67    1.62
   7  -5  -5   13.19    1.48
  -7   5   5   15.62    2.01
  -7   5   5   12.81    1.60
   6  -5  -5   30.87    1.95
   6  -5  -5   30.55    1.85
  -6   5   5   28.68    2.20
  -6   5   5   27.84    2.12
   5  -5  -5  212.50    7.42
   5  -5  -5  216.99    7.74
  -5   5   5  215.35    8.17
  -5   5   5  211.95    8.04
   4  -5  -5   25.61    1.71
   4  -5  -5   28.61    1.49
   4  -5  -5   28.50    1.48
  -4   5   5   23.97    1.75
  -4   5   5   23.88    1.88
   3  -5  -5    8.28    0.99
   3  -5  -5    9.45    1.16
   3  -5  -5    6.56    0.85
  -3   5   5    7.07    1.06
  -3   5   5    7.53    1.22
  -3   5   5    8.34    0.93
   2  -5  -5    2.91    0.61
   2  -5  -5    5.16    0.92
   2  -5  -5    4.40    0.75
  -2   5   5    1.05    0.61
  -2   5   5    4.29    0.74
   1  -5  -5   32.97    2.03
   1  -5  -5   32.29    2.04
   1  -5  -5   32.53    1.93
  -1   5   5   34.15    2.02
   0  -5  -5    4.91    0.90
   0  -5  -5    7.59    1.15
   0   5   5    4.57    0.83
  -1  -5  -5   43.60    2.64
  -1  -5  -5   48.36    2.62
   1   5   5   45.17    2.62
   1   5   5   42.63    2.47
  -2  -5  -5   76.99    3.84
  -2  -5  -5   73.53    3.67
   2   5   5   69.34    3.70
   2   5   5   73.45    3.61
  -3  -5  -5   11.03    1.69
  -3  -5  -5   13.26    1.73
   3   5   5   13.44    1.65
   3   5   5   14.38    1.85
  -4  -5  -5   11.63    1.78
  -4  -5  -5   11.56    1.84
   4   5   5   17.67    2.31
   4   5   5   12.49    1.78
  -5  -5  -5   -0.13    0.86
  -5  -5  -5    0.57    0.62
   5   5   5    0.75    0.91
  10  -6  -5    0.14    0.55
  10  -6  -5   -0.18    0.53
 -10   6   5    1.13    0.75
   9  -6  -5    5.39    1.18
   9  -6  -5    7.89    1.43
  -9   6   5    7.65    1.62
   8  -6  -5    1.95    0.70
   8  -6  -5    1.56    0.69
  -8   6   5    2.08    0.87
   7  -6  -5    0.86    0.52
   7  -6  -5    0.84    0.53
  -7   6   5    1.05    0.60
  -7   6   5    1.99    0.81
   6  -6  -5  155.81    5.82
   6  -6  -5  158.86    6.14
  -6   6   5  147.32    6.39
  -6   6   5  148.99    6.44
   5  -6  -5    4.61    0.93
   5  -6  -5    4.56    0.74
  -5   6   5    3.46    0.84
  -5   6   5    4.19    0.94
   4  -6  -5   62.54    3.13
   4  -6  -5   61.58    2.67
  -4   6   5   60.68    3.08
  -4   6   5   62.86    3.40
   3  -6  -5   91.94    4.01
   3  -6  -5   85.25    3.69
  -3   6   5   91.25    4.14
  -3   6   5   82.93    3.60
   2  -6  -5   21.64    1.52
   2  -6  -5   25.50    1.81
  -2   6   5   22.37    1.60
  -2   6   5   24.64    1.52
   1  -6  -5   57.59    2.84
   1  -6  -5   61.10    3.07
  -1   6   5   50.98    2.71
   0  -6  -5   24.82    1.88
   0  -6  -5   22.63    1.72
   0   6   5   26.04    1.79
  -1  -6  -5    0.82    0.58
  -1  -6  -5    0.18    0.54
   1   6   5    0.10    0.38
  -2  -6  -5   30.83    2.30
  -2  -6  -5   28.96    2.34
   2   6   5   36.18    2.50
   2   6   5   29.46    2.18
  -3  -6  -5  136.28    6.16
  -3  -6  -5  140.99    6.36
   3   6   5  143.75    6.26
   3   6   5  141.30    6.11
  -4  -6  -5    6.69    1.61
  -4  -6  -5    6.21    1.37
   4   6   5    2.61    1.12
   4   6   5    5.68    1.27
   9  -7  -5   33.73    2.59
   9  -7  -5   31.93    2.42
  -9   7   5   35.53    3.03
   8  -7  -5   16.49    1.93
   8  -7  -5   15.83    1.88
  -8   7   5   17.90    2.33
   7  -7  -5   32.17    2.14
   7  -7  -5   39.29    2.54
  -7   7   5   35.20    2.66
   6  -7  -5   48.49    2.80
   6  -7  -5   45.93    2.42
  -6   7   5   42.95    2.96
  -6   7   5   47.55    2.95
   5  -7  -5    0.30    0.32
   5  -7  -5    0.46    0.47
  -5   7   5   -0.01    0.37
  -5   7   5   -0.32    0.29
   4  -7  -5  224.49    8.36
   3  -7  -5    5.33    1.02
   3  -7  -5    7.92    1.24
   2  -7  -5   13.36    1.52
   2  -7  -5   15.92    1.86
   1  -7  -5  107.20    4.84
   1  -7  -5  107.57    4.63
  -1   7   5  111.56    4.61
   0  -7  -5   13.10    1.69
   0  -7  -5   10.04    1.43
   0   7   5   13.26    1.61
  -1  -7  -5   58.21    3.28
  -1  -7  -5   54.98    3.31
   1   7   5   57.72    3.19
  -2  -7  -5   38.67    2.82
  -2  -7  -5   35.55    2.64
   2   7   5   37.93    2.59
  -3  -7  -5   44.36    3.33
  -3  -7  -5   42.07    3.02
   3   7   5   42.70    2.92
   9  -8  -5   44.03    2.91
   9  -8  -5   46.49    3.15
  -9   8   5   43.62    3.44
   8  -8  -5    6.16    1.18
   8  -8  -5    5.21    1.17
  -8   8   5    4.74    1.22
   7  -8  -5    6.41    1.08
   7  -8  -5    6.03    1.19
  -7   8   5    8.18    1.51
   6  -8  -5    3.29    1.07
   6  -8  -5    1.61    0.70
   5  -8  -5    4.19    1.01
   4  -8  -5   42.93    2.74
   3  -8  -5    0.48    0.33
   3  -8  -5    0.37    0.45
  -3   8   5    0.93    0.57
   2  -8  -5   55.66    3.28
   2  -8  -5   64.27    3.13
   1  -8  -5   28.57    2.06
   1  -8  -5   30.74    2.33
  -1   8   5   27.64    2.00
   0  -8  -5    7.72    1.33
   0  -8  -5   13.03    1.88
   0   8   5   10.41    1.45
  -1  -8  -5   14.06    1.87
  -1  -8  -5   17.72    2.19
   1   8   5   13.54    1.79
  -2  -8  -5    4.03    1.15
  -2  -8  -5    6.57    1.55
   2   8   5    7.80    1.55
   9  -9  -5    3.69    1.10
   9  -9  -5    5.42    1.23
  -9   9   5    5.02    1.41
   8  -9  -5   15.67    2.06
   8  -9  -5   12.88    1.65
   7  -9  -5    0.54    0.63
   6  -9  -5    1.11    0.68
   5  -9  -5   46.87    3.03
   4  -9  -5    1.62    0.71
  -4   9   5    1.02    0.69
   3  -9  -5    3.90    0.98
   3  -9  -5    2.74    0.73
   2  -9  -5   40.72    2.78
   2  -9  -5   33.32    2.29
  -2   9   5   35.45    2.31
   1  -9  -5    7.04    1.26
   1  -9  -5    8.05    1.47
  -1   9   5    7.39    1.28
   0  -9  -5   40.40    2.97
   0  -9  -5   39.52    2.79
   0   9   5   45.73    2.86
  -1  -9  -5    0.65    0.84
  -1  -9  -5   -0.46    0.57
   1   9   5   -0.23    0.50
  -2  -9  -5    6.20    1.57
  -2  -9  -5    7.44    1.64
   2   9   5    4.06    1.22
   8 -10  -5   13.59    1.93
   7 -10  -5    5.84    1.46
   6 -10  -5   15.05    2.12
   5 -10  -5   22.49    2.50
   4 -10  -5    0.08    0.55
   3 -10  -5    0.65    0.66
   2 -10  -5    0.99    0.79
   2 -10  -5    1.66    0.75
  -2  10   5    1.11    0.61
   1 -10  -5    0.52    0.54
   1 -10  -5   -0.48    0.63
  -1  10   5    1.24    0.63
   0 -10  -5    8.29    1.55
   0 -10  -5    9.89    1.78
   0  10   5   11.41    1.81
   7 -11  -5   26.43    3.05
   6 -11  -5    5.15    1.38
   5 -11  -5   -0.06    0.56
   4 -11  -5    6.13    1.44
   3 -11  -5    0.73    0.69
   2 -11  -5    1.07    0.85
   2 -11  -5   -0.03    0.55
  -2  11   5    0.06    0.54
   1 -11  -5   16.29    2.40
   1 -11  -5   15.55    2.12
  -1  11   5   14.31    2.00
   0  12  -6    3.62    1.28
   1 -12   6   58.66    3.60
   2 -12   6   10.67    1.74
   3 -12   6   16.21    2.10
   2  11  -6   12.62    2.02
   1  11  -6    1.99    0.84
   0  11  -6   28.55    2.36
   2 -11   6   44.42    2.94
   3 -11   6   33.58    2.55
   4 -11   6    0.24    0.63
   5 -11   6    9.65    1.64
   3  10  -6   18.60    2.34
   2  10  -6    3.28    1.02
   1  10  -6   24.23    2.48
   0  10  -6   35.97    2.51
  -1  10  -6   16.13    1.86
   2 -10   6    0.73    0.64
   3 -10   6   30.89    2.32
   4 -10   6   42.88    2.88
   5 -10   6    6.50    1.32
   5 -10   6    4.60    1.17
   4   9  -6    0.01    0.52
   3   9  -6   40.47    2.90
   2   9  -6    1.86    0.75
   1   9  -6    0.03    0.45
   0   9  -6  162.07    6.52
  -1   9  -6    0.89    0.57
   2  -9   6    4.62    1.00
   3  -9   6    0.11    0.45
   4  -9   6    2.73    0.84
   4  -9   6    3.92    1.02
   5  -9   6    9.34    1.50
   5  -9   6   14.49    1.91
   6  -9   6   16.67    2.10
   6  -9   6   19.02    2.26
   5   8  -6   18.13    2.20
   4   8  -6   72.74    4.05
   3   8  -6    8.98    1.52
   2   8  -6    6.74    1.24
   1   8  -6   96.79    4.40
   0   8  -6    7.02    1.16
  -1   8  -6    7.07    1.09
   2  -8   6    0.00    0.44
   3  -8   6    0.21    0.47
   3  -8   6    1.24    0.55
   3  -8   6   -0.21    0.34
   4  -8   6   32.47    2.24
   4  -8   6   32.69    2.68
   4  -8   6   38.37    2.47
   5  -8   6   69.17    3.70
   5  -8   6   68.97    3.76
   6  -8   6    1.22    0.78
   6  -8   6    2.02    0.80
   6   7  -6    1.86    0.87
   5   7  -6   31.28    2.46
   4   7  -6    5.74    1.16
   3   7  -6   55.18    3.14
   2   7  -6   20.60    1.66
   1   7  -6    0.78    0.46
   0   7  -6    5.79    0.93
  -1   7  -6   58.90    2.86
   1  -7   6   57.98    3.12
  -2   7  -6  102.07    4.02
   2  -7   6   98.78    4.55
   2  -7   6   91.27    4.21
   2  -7   6   94.03    3.95
   3  -7   6    2.85    0.68
   3  -7   6    4.80    1.09
   3  -7   6    2.63    0.70
  -4   7  -6  138.79    6.38
   4  -7   6  123.21    5.43
   4  -7   6  127.39    6.06
   4  -7   6  130.46    5.47
   5  -7   6    0.92    0.57
   5  -7   6    2.26    0.82
   6  -7   6    0.50    0.58
   6  -7   6    0.76    0.62
   7  -7   6    1.07    0.68
   7  -7   6    2.29    0.98
   7   6  -6    0.72    0.67
   7   6  -6    0.20    0.82
   6   6  -6    6.54    1.27
   6   6  -6    7.77    1.36
   5   6  -6   71.96    3.78
   5   6  -6   67.39    3.53
   4   6  -6   63.46    3.41
   3   6  -6   72.72    3.56
   2   6  -6   35.46    2.16
   1   6  -6   -0.18    0.30
  -1  -6   6   -0.19    0.39
   0   6  -6    4.64    0.86
   0  -6   6    7.10    1.16
  -1   6  -6   83.01    3.50
   1  -6   6   79.37    3.87
  -2   6  -6   32.78    2.51
  -2   6  -6   33.71    1.88
   2  -6   6   37.23    2.42
   2  -6   6   34.42    1.93
   2  -6   6   31.70    2.03
  -3   6  -6  225.62    8.74
   3  -6   6  211.60    7.77
   3  -6   6  207.79    8.38
   3  -6   6  212.52    7.84
  -4   6  -6   36.68    2.76
   4  -6   6   37.65    2.38
   4  -6   6   40.61    2.44
   4  -6   6   39.56    2.87
   5  -6   6   10.97    1.55
   5  -6   6   14.62    1.75
   6  -6   6   22.26    2.36
   6  -6   6   17.77    2.02
   7  -6   6    0.31    0.53
   7  -6   6    0.73    0.73
   7   5  -6    1.05    0.76
   7   5  -6    2.63    0.95
   6   5  -6   48.23    2.89
   6   5  -6   54.28    3.18
   5   5  -6    8.01    1.30
   5   5  -6    7.45    1.24
   4   5  -6   11.21    1.40
   4   5  -6   15.16    1.66
   3   5  -6    3.74    0.78
   3   5  -6    4.98    0.95
  -3  -5   6    1.73    0.77
   2   5  -6    3.34    0.79
   2   5  -6    2.61    0.68
  -2  -5   6    3.54    0.94
   1   5  -6    8.56    1.08
   1   5  -6    7.95    1.19
  -1  -5   6    7.50    1.16
   0   5  -6  304.85   10.63
   0   5  -6  276.49    9.56
   0   5  -6  285.16   10.07
   0  -5   6  270.05    9.86
  -1   5  -6  185.37    7.56
  -1   5  -6  200.93    7.49
  -1   5  -6  198.56    6.84
   1  -5   6  193.50    7.35
   1  -5   6  189.22    6.62
  -2   5  -6   12.29    1.21
   2  -5   6   11.55    1.23
   2  -5   6   12.25    1.55
   2  -5   6   11.47    1.30
  -3   5  -6   17.22    1.74
   3  -5   6   18.95    1.48
   3  -5   6   15.19    1.90
   3  -5   6   19.28    1.48
  -4   5  -6   16.01    1.98
   4  -5   6   16.13    1.67
   4  -5   6   19.02    2.30
   4  -5   6   16.87    1.73
   5  -5   6    0.50    0.47
   5  -5   6    0.30    0.59
   5  -5   6   -0.24    0.39
   6  -5   6   38.90    2.48
   6  -5   6   34.14    2.61
   7  -5   6    0.79    0.75
   7  -5   6    1.00    0.63
   8   4  -6   65.43    4.97
   8   4  -6   59.51    3.58
   7   4  -6   -0.02    0.46
   7   4  -6   -0.42    0.33
   6   4  -6    0.01    0.41
   6   4  -6   -0.16    0.46
   5   4  -6    2.73    0.82
   5   4  -6    2.27    0.67
  -5  -4   6    1.86    0.81
   4   4  -6    0.76    0.46
   4   4  -6    0.89    0.56
   4   4  -6    1.42    0.52
  -4  -4   6    0.68    0.52
   3   4  -6   52.62    2.63
   3   4  -6   52.83    2.59
   3   4  -6   50.92    2.52
  -3  -4   6   38.89    2.75
   2   4  -6   42.31    2.19
   2   4  -6   40.14    2.25
   1   4  -6  145.30    5.43
   1   4  -6  141.49    5.86
   1   4  -6  149.37    5.69
  -1  -4   6  155.98    5.90
   0   4  -6   80.62    3.39
   0   4  -6   76.56    3.62
   0   4  -6   82.33    3.92
   0  -4   6   79.96    3.74
   0  -4   6   92.31    3.35
  -1   4  -6    5.56    0.81
  -1   4  -6    5.77    1.02
  -1   4  -6    5.80    1.11
   1  -4   6    4.03    0.63
   1  -4   6    5.30    1.00
  -2   4  -6    3.19    0.80
  -2   4  -6    2.98    0.62
   2  -4   6    2.82    0.60
   2  -4   6    2.50    0.83
  -3   4  -6    4.64    1.01
  -3   4  -6    4.59    0.73
   3  -4   6    3.30    0.92
   3  -4   6    3.54    0.76
   3  -4   6    4.60    0.84
  -4   4  -6    4.06    1.05
   4  -4   6    4.03    0.88
   4  -4   6    3.05    0.91
   4  -4   6    2.39    0.64
   5  -4   6   18.54    1.98
   5  -4   6   18.76    2.42
   5  -4   6   19.00    1.92
   6  -4   6    2.73    0.92
   6  -4   6    3.93    0.88
   7  -4   6   -0.26    0.62
   7  -4   6   -0.15    0.46
   8   3  -6    0.75    0.68
   7   3  -6    5.44    1.08
   7   3  -6    7.29    1.32
  -7  -3   6    6.86    1.40
   6   3  -6    9.57    1.31
   6   3  -6    9.81    1.35
  -6  -3   6   10.63    1.60
   5   3  -6   51.39    2.71
   5   3  -6   54.53    2.80
  -5  -3   6   52.40    3.01
   4   3  -6  158.60    5.75
   4   3  -6  150.72    5.80
   4   3  -6  153.79    5.83
  -4  -3   6  152.43    6.14
   3   3  -6    3.58    0.68
   3   3  -6    2.36    0.59
   3   3  -6    3.59    0.67
  -3  -3   6    2.77    0.83
  -3  -3   6    2.94    0.58
   2   3  -6    3.97    0.88
   2   3  -6    3.47    0.67
  -2  -3   6    2.56    0.57
   1   3  -6  111.58    4.46
   1   3  -6  113.91    4.35
   1   3  -6  117.43    4.75
  -1  -3   6  109.75    4.39
  -1  -3   6  116.58    4.87
   0   3  -6   49.34    2.55
   0   3  -6   51.93    2.37
   0   3  -6   51.31    2.74
   0  -3   6   52.75    2.77
   0  -3   6   53.13    2.12
  -1   3  -6   20.38    1.54
  -1   3  -6   19.08    1.26
   1  -3   6   16.93    1.15
   1  -3   6   19.33    1.60
  -2   3  -6    2.32    0.65
  -2   3  -6    3.18    0.80
  -2   3  -6    2.28    0.56
   2  -3   6    3.15    0.62
   2  -3   6    2.91    0.80
   2  -3   6    2.31    0.55
  -3   3  -6   -0.16    0.24
  -3   3  -6   -0.13    0.29
   3  -3   6    0.05    0.35
   3  -3   6    0.30    0.31
   3  -3   6   -0.05    0.35
  -4   3  -6   78.73    3.89
   4  -3   6   74.22    3.61
   4  -3   6   68.68    4.01
   4  -3   6   76.45    3.38
   5  -3   6   30.57    2.62
   5  -3   6   30.16    2.26
   5  -3   6   31.55    2.00
   6  -3   6    4.53    1.22
   7  -3   6    2.57    1.01
   9   2  -6   39.38    2.88
  -9  -2   6   40.93    3.34
   8   2  -6    3.23    0.93
  -8  -2   6    5.15    1.32
   7   2  -6   38.28    2.46
   7   2  -6   35.77    2.31
  -7  -2   6   41.58    2.90
   6   2  -6   72.06    3.48
   6   2  -6   76.28    3.44
  -6  -2   6   67.73    3.82
   5   2  -6    9.11    1.12
   5   2  -6   10.87    1.27
  -5  -2   6   10.84    1.50
   4   2  -6  144.56    5.48
   4   2  -6  145.66    5.50
   4   2  -6  150.77    5.30
  -4  -2   6  149.01    5.93
   3   2  -6    7.21    0.89
   3   2  -6    9.03    0.79
   3   2  -6    8.25    0.97
  -3  -2   6    7.51    0.71
  -3  -2   6    5.98    1.12
   2   2  -6   -0.04    0.26
   2   2  -6    0.32    0.27
   2   2  -6    0.58    0.30
  -2  -2   6    0.02    0.46
  -2  -2   6    0.38    0.25
   1   2  -6   61.43    2.65
   1   2  -6   57.23    2.53
  -1  -2   6   49.75    2.99
  -1  -2   6   60.51    2.63
   0   2  -6   19.85    1.28
   0   2  -6   19.82    1.77
   0   2  -6   18.61    1.09
   0   2  -6   20.74    1.44
   0  -2   6   19.89    1.13
   0  -2   6   18.63    1.56
   0  -2   6   25.82    1.69
  -1   2  -6   16.71    1.35
  -1   2  -6   17.13    1.42
  -1   2  -6   14.82    1.10
   1  -2   6   16.37    1.46
   1  -2   6   15.65    1.10
  -2   2  -6  113.62    4.35
  -2   2  -6  112.18    4.83
  -2   2  -6  110.43    4.83
   2  -2   6  112.54    4.99
   2  -2   6  117.67    4.49
   2  -2   6  114.73    4.29
  -3   2  -6  235.62    8.51
  -3   2  -6  228.28    7.94
   3  -2   6  225.86    8.20
   3  -2   6  227.21    8.76
  -4   2  -6    0.03    0.37
  -4   2  -6   -0.40    0.23
   4  -2   6    0.02    0.19
   4  -2   6    0.30    0.43
   4  -2   6   -0.01    0.37
   5  -2   6    0.15    0.46
   5  -2   6    0.37    0.54
   6  -2   6    6.10    1.28
  -7   2  -6    0.26    0.60
   7  -2   6    0.58    0.74
   9   1  -6    1.14    0.70
  -9  -1   6    1.24    0.83
   8   1  -6   22.14    2.30
  -8  -1   6   24.76    2.35
   7   1  -6    0.02    0.40
   7   1  -6    0.04    0.32
  -7  -1   6    0.15    0.45
   6   1  -6   72.56    3.51
   6   1  -6   78.13    3.43
  -6  -1   6   76.79    3.99
   5   1  -6  636.19   20.31
   5   1  -6  635.34   20.19
  -5  -1   6  641.18   20.85
   4   1  -6    0.10    0.33
   4   1  -6    0.54    0.29
   4   1  -6    0.03    0.14
  -4  -1   6    0.23    0.39
   3   1  -6  124.11    4.74
   3   1  -6  127.30    4.73
   3   1  -6  130.24    4.51
  -3  -1   6  133.03    5.35
  -3  -1   6  128.27    4.45
   2   1  -6    9.53    0.77
   2   1  -6   10.38    0.86
   2   1  -6   12.18    1.11
  -2  -1   6    4.70    1.11
  -2  -1   6   10.26    0.78
   1   1  -6    0.08    0.21
   1   1  -6   -0.11    0.08
  -1  -1   6    0.38    0.61
  -1  -1   6    0.26    0.23
   0   1  -6  254.68    8.60
   0   1  -6  243.78    8.97
   0   1  -6  254.47    8.40
   0   1  -6  253.23    8.79
   0  -1   6  256.60    9.07
   0  -1   6  268.13    8.44
   0  -1   6  265.78    8.77
  -1   1  -6   30.06    1.67
  -1   1  -6   27.84    1.61
  -1   1  -6   28.59    1.86
   1  -1   6   30.45    1.66
   1  -1   6   29.90    1.98
  -2   1  -6   36.03    2.18
  -2   1  -6   34.59    1.92
  -2   1  -6   37.42    2.04
  -2   1  -6   33.73    2.20
   2  -1   6   34.98    2.34
   2  -1   6   36.07    2.03
   2  -1   6   35.87    1.75
  -3   1  -6    1.70    0.61
  -3   1  -6    1.30    0.51
  -3   1  -6    0.60    0.41
   3  -1   6    0.84    0.36
   3  -1   6    1.49    0.64
   3  -1   6    2.44    0.69
  -4   1  -6   67.00    3.46
  -4   1  -6   64.29    3.28
  -4   1  -6   65.27    3.13
   4  -1   6   68.74    3.49
   4  -1   6   68.48    3.88
  -5   1  -6    9.46    1.54
   5  -1   6    6.67    1.24
  -6   1  -6    0.51    0.58
   6  -1   6    0.37    0.75
  -7   1  -6    1.41    0.95
   7  -1   6    0.19    0.75
   9   0  -6    5.98    1.29
  -9   0   6    6.91    1.62
   8   0  -6   20.69    2.16
  -8   0   6   26.04    2.40
   7   0  -6    4.57    0.96
  -7   0   6    5.06    1.22
   6   0  -6    3.07    0.72
   6   0  -6    3.43    0.70
  -6   0   6    3.25    1.00
   5   0  -6   -0.05    0.24
   5   0  -6    0.17    0.25
  -5   0   6   -0.02    0.29
   4   0  -6   26.38    1.48
   4   0  -6   24.64    1.50
  -4   0   6   23.71    1.60
  -4   0   6   25.51    1.84
   3   0  -6    1.20    0.38
   3   0  -6    1.12    0.27
   3   0  -6    1.73    0.43
  -3   0   6    1.85    0.64
  -3   0   6    1.70    0.31
  -3   0   6    1.41    0.47
   2   0  -6  138.34    4.88
   2   0  -6  143.75    4.94
   2   0  -6  141.55    5.05
  -2   0   6  140.01    4.84
   1   0  -6  101.19    3.81
   1   0  -6   98.14    3.59
  -1   0   6   98.30    3.60
  -1   0   6   99.86    3.77
  -1   0   6   86.00    4.35
  -1   0   6  101.75    4.11
   0   0  -6  475.69   15.46
   0   0  -6  475.44   15.73
   0   0  -6  472.14   15.16
   0   0  -6  485.95   15.44
   0   0  -6  475.46   15.28
   0   0   6  472.97   15.16
   0   0   6  489.62   15.44
   0   0   6  488.33   15.77
  -1   0  -6   33.81    1.85
  -1   0  -6   34.60    2.08
  -1   0  -6   32.27    1.83
   1   0   6   33.29    2.14
   1   0   6   35.10    1.58
   1   0   6   32.32    1.83
  -2   0  -6   45.76    2.41
  -2   0  -6   45.76    2.34
   2   0   6   46.94    2.75
   2   0   6   43.37    2.38
  -3   0  -6   14.61    1.32
  -3   0  -6   14.45    1.53
  -3   0  -6    9.38    1.31
   3   0   6   16.42    1.71
   3   0   6   14.63    1.80
  -4   0  -6   18.84    2.04
  -4   0  -6   24.06    1.70
   4   0   6   14.96    1.73
   4   0   6   22.24    2.05
  -5   0  -6    0.12    0.52
   5   0   6   -0.01    0.57
  -6   0  -6    1.11    0.79
   6   0   6   -0.21    0.64
   9  -1  -6   63.64    3.67
  -9   1   6   69.87    4.42
   8  -1  -6  154.55    6.34
  -8   1   6  155.28    7.10
   7  -1  -6    9.10    1.27
  -7   1   6    8.90    1.52
   6  -1  -6   23.38    1.46
   6  -1  -6   24.11    1.66
  -6   1   6   23.46    1.62
  -6   1   6   21.87    1.93
   5  -1  -6    1.77    0.48
   5  -1  -6    1.40    0.45
  -5   1   6    2.31    0.74
  -5   1   6    2.51    0.63
   4  -1  -6   63.60    2.76
   4  -1  -6   70.44    2.87
   4  -1  -6   66.61    2.60
  -4   1   6   66.55    3.30
  -4   1   6   64.74    3.09
   3  -1  -6   58.09    2.38
   3  -1  -6   57.04    2.17
   3  -1  -6   58.29    2.54
   3  -1  -6   62.65    2.20
   3  -1  -6   59.57    2.50
  -3   1   6   58.89    2.88
  -3   1   6   60.20    2.18
  -3   1   6   62.46    3.08
   2  -1  -6   65.59    2.61
   2  -1  -6   62.29    2.57
   2  -1  -6   62.69    2.75
   2  -1  -6   68.95    2.61
   2  -1  -6   67.94    2.66
  -2   1   6   63.36    2.58
  -2   1   6   72.26    3.18
   1  -1  -6  321.61   10.36
   1  -1  -6  316.19   10.19
   1  -1  -6  321.74   10.34
   1  -1  -6  314.41   10.79
  -1   1   6  326.14   10.34
  -1   1   6  297.62   10.18
  -1   1   6  329.61   10.79
  -1   1   6  284.43   10.92
   0  -1  -6  294.49    9.95
   0  -1  -6  291.12    9.76
   0  -1  -6  286.66    9.74
   0   1   6  306.29   10.15
   0   1   6  291.90   10.12
   0   1   6  282.26    9.69
  -1  -1  -6    4.94    0.80
  -1  -1  -6    5.08    0.87
  -1  -1  -6    4.84    0.89
   1   1   6    3.84    0.84
   1   1   6    4.52    0.80
  -2  -1  -6    3.82    0.86
  -2  -1  -6    3.35    0.74
   2   1   6    2.71    0.69
  -3  -1  -6    9.90    1.37
  -3  -1  -6    9.94    1.33
  -3  -1  -6    9.99    1.35
   3   1   6   10.72    1.56
   3   1   6    9.60    1.36
  -4  -1  -6  104.82    4.58
  -4  -1  -6   99.21    4.77
   4   1   6  105.50    5.17
   4   1   6  101.49    4.76
  -5  -1  -6   -0.02    0.57
  -5  -1  -6   -0.08    0.56
   5   1   6   -0.29    0.46
  -6  -1  -6    0.84    0.72
   6   1   6    1.50    0.85
  10  -2  -6   15.53    2.07
 -10   2   6   16.97    2.64
   9  -2  -6   36.15    2.60
  -9   2   6   42.41    3.32
   8  -2  -6    0.34    0.39
  -8   2   6    0.04    0.47
   7  -2  -6    0.62    0.43
  -7   2   6    0.79    0.57
  -7   2   6    0.58    0.39
   6  -2  -6   -0.14    0.33
  -6   2   6    0.58    0.38
  -6   2   6    0.29    0.38
   5  -2  -6   36.36    1.98
   5  -2  -6   37.01    1.85
   5  -2  -6   38.89    1.87
  -5   2   6   36.47    2.37
  -5   2   6   37.78    2.23
   4  -2  -6   66.97    2.79
   4  -2  -6   67.87    2.85
  -4   2   6   68.26    3.27
  -4   2   6   68.47    3.35
   3  -2  -6   67.73    2.65
   3  -2  -6   63.26    2.74
   3  -2  -6   63.13    2.40
   3  -2  -6   65.39    2.42
   3  -2  -6   65.63    2.72
  -3   2   6   69.88    3.32
   2  -2  -6   17.10    1.14
   2  -2  -6   15.21    1.00
   2  -2  -6   15.65    1.02
   2  -2  -6   13.83    0.97
   2  -2  -6   13.47    1.06
  -2   2   6   13.44    0.96
  -2   2   6   17.58    1.40
   1  -2  -6  143.63    5.23
   1  -2  -6  144.86    5.19
   1  -2  -6  149.43    5.30
  -1   2   6  137.46    5.74
  -1   2   6  125.29    5.08
  -1   2   6  150.21    5.62
   0  -2  -6  128.29    4.84
   0  -2  -6  123.89    4.94
   0  -2  -6  126.24    4.81
   0   2   6  121.87    4.78
   0   2   6  121.89    5.01
  -1  -2  -6   65.35    3.02
  -1  -2  -6   63.84    3.09
  -1  -2  -6   62.42    3.19
   1   2   6   61.64    3.18
   1   2   6   63.57    3.02
  -2  -2  -6    1.24    0.55
  -2  -2  -6    0.55    0.51
   2   2   6    0.32    0.40
   2   2   6    0.46    0.48
  -3  -2  -6   12.21    1.65
  -3  -2  -6   12.14    1.52
   3   2   6   13.22    1.77
   3   2   6   11.44    1.53
  -4  -2  -6   14.79    1.80
  -4  -2  -6   12.51    1.82
   4   2   6   14.82    2.02
   4   2   6   11.40    1.64
  -5  -2  -6    3.91    1.07
  -5  -2  -6    3.42    1.08
   5   2   6    2.09    0.93
  -6  -2  -6    2.78    1.18
   6   2   6    1.50    0.92
  10  -3  -6   51.34    3.26
 -10   3   6   44.66    3.72
   9  -3  -6    0.29    0.44
  -9   3   6    0.22    0.51
   8  -3  -6    7.09    1.17
  -8   3   6    8.56    1.66
   7  -3  -6    5.82    1.11
   7  -3  -6    2.22    0.72
  -7   3   6    4.21    0.89
  -7   3   6    4.80    1.14
   6  -3  -6    7.49    0.97
   6  -3  -6    9.66    1.17
  -6   3   6    9.09    1.37
  -6   3   6   10.07    1.51
   5  -3  -6    4.05    0.68
   5  -3  -6    5.10    0.78
   5  -3  -6    5.16    0.70
  -5   3   6    4.47    0.96
  -5   3   6    6.70    1.18
   4  -3  -6  345.46   11.05
   4  -3  -6  346.54   11.05
   4  -3  -6  338.58   11.17
  -4   3   6  336.34   11.76
  -4   3   6  336.78   11.73
   3  -3  -6  175.27    5.94
   3  -3  -6  179.87    6.29
   3  -3  -6  186.04    5.98
   3  -3  -6  174.78    5.91
   3  -3  -6  171.64    6.17
  -3   3   6  166.83    6.72
  -3   3   6  182.76    6.85
   2  -3  -6   15.11    1.14
   2  -3  -6   14.85    1.17
   2  -3  -6   15.49    1.12
   2  -3  -6   15.32    1.11
  -2   3   6   15.73    1.40
   1  -3  -6    8.48    1.03
   1  -3  -6   10.42    1.20
   1  -3  -6   11.74    1.20
  -1   3   6    9.20    1.48
  -1   3   6   10.80    1.39
   0  -3  -6    6.51    0.97
   0  -3  -6   10.64    1.39
   0  -3  -6    8.66    1.16
   0   3   6    7.88    1.05
  -1  -3  -6    5.37    1.06
  -1  -3  -6    5.03    0.94
   1   3   6    3.92    0.81
   1   3   6    4.73    0.95
  -2  -3  -6    1.42    0.68
  -2  -3  -6    1.06    0.47
   2   3   6    0.79    0.55
   2   3   6    1.11    0.54
  -3  -3  -6    4.78    0.97
  -3  -3  -6    6.20    1.31
   3   3   6    5.47    1.16
  -4  -3  -6   16.02    1.88
  -4  -3  -6   19.56    2.27
   4   3   6   16.86    2.10
  -5  -3  -6    4.63    1.19
  -5  -3  -6    3.28    1.19
   5   3   6    6.05    1.44
  10  -4  -6    1.07    0.62
 -10   4   6    1.28    0.97
   9  -4  -6   10.06    1.51
  -9   4   6    7.40    1.59
   8  -4  -6    5.36    1.51
   8  -4  -6    3.79    0.94
  -8   4   6    4.42    1.20
   7  -4  -6   33.09    2.00
   7  -4  -6   30.57    2.01
  -7   4   6   30.67    2.47
  -7   4   6   26.85    2.10
   6  -4  -6   85.48    3.66
   6  -4  -6   82.94    3.66
  -6   4   6   83.94    4.25
  -6   4   6   82.55    4.06
   5  -4  -6   96.45    4.04
   5  -4  -6   99.42    3.93
  -5   4   6  104.11    4.59
  -5   4   6   93.40    4.45
   4  -4  -6   25.54    1.63
   4  -4  -6   25.18    1.45
   4  -4  -6   24.83    1.42
  -4   4   6   24.55    1.83
   3  -4  -6   79.01    3.24
   3  -4  -6   79.60    3.12
   3  -4  -6   73.90    3.34
   3  -4  -6   73.66    3.05
  -3   4   6   76.41    3.76
  -3   4   6   77.41    3.75
  -3   4   6   77.79    3.05
   2  -4  -6   10.10    1.15
   2  -4  -6    8.15    1.04
   2  -4  -6    8.31    1.01
   2  -4  -6    9.01    1.09
  -2   4   6    7.08    0.92
  -2   4   6    8.28    1.32
   1  -4  -6    0.09    0.25
   1  -4  -6   -0.15    0.32
   1  -4  -6    0.07    0.26
  -1   4   6   -0.06    0.23
  -1   4   6    0.43    0.46
  -1   4   6    0.11    0.27
   0  -4  -6  111.98    4.62
   0  -4  -6  111.66    4.53
   0   4   6  114.84    4.60
   0   4   6   94.70    5.25
   0   4   6  110.19    4.62
  -1  -4  -6   79.24    3.71
  -1  -4  -6   81.50    3.86
   1   4   6   77.86    3.79
  -2  -4  -6   21.05    2.10
  -2  -4  -6   19.56    2.16
   2   4   6   14.71    1.81
  -3  -4  -6    3.24    0.91
  -3  -4  -6    3.29    1.02
   3   4   6    2.76    0.94
  -4  -4  -6   21.31    2.65
  -4  -4  -6   21.50    2.33
   4   4   6   22.48    2.50
  -5  -4  -6    0.79    0.79
  -5  -4  -6   -0.28    0.80
   5   4   6    1.01    0.92
  10  -5  -6    0.58    0.66
 -10   5   6    0.33    0.67
   9  -5  -6   47.65    3.01
  -9   5   6   52.45    3.76
   8  -5  -6   51.86    2.96
   8  -5  -6   53.12    2.98
  -8   5   6   52.81    3.58
   7  -5  -6   25.15    1.85
   7  -5  -6   26.27    1.83
  -7   5   6   23.46    2.17
  -7   5   6   23.47    2.04
   6  -5  -6   64.65    3.08
   6  -5  -6   65.81    3.23
  -6   5   6   63.70    3.62
  -6   5   6   70.43    3.68
   5  -5  -6    0.18    0.27
   5  -5  -6    0.38    0.35
  -5   5   6   -0.04    0.31
  -5   5   6    0.50    0.48
   4  -5  -6   13.96    1.53
   4  -5  -6   11.77    1.22
   4  -5  -6   14.90    1.04
  -4   5   6   14.69    1.93
  -4   5   6   13.31    1.64
   3  -5  -6    9.16    1.24
   3  -5  -6    9.00    1.11
   3  -5  -6    7.88    0.99
  -3   5   6   11.24    1.79
  -3   5   6    8.50    1.41
  -3   5   6   10.65    1.39
   2  -5  -6   17.30    1.70
   2  -5  -6   14.81    1.25
   2  -5  -6   15.14    1.29
  -2   5   6   13.97    1.20
   1  -5  -6  181.51    6.97
   1  -5  -6  185.48    6.77
   1  -5  -6  180.10    6.86
  -1   5   6  181.78    6.85
   0  -5  -6   51.24    2.80
   0  -5  -6   56.86    3.02
  -1  -5  -6   21.74    1.81
  -1  -5  -6   20.39    2.18
   1   5   6   24.65    1.95
  -2  -5  -6    2.09    0.88
  -2  -5  -6    2.97    0.90
   2   5   6    6.63    1.33
  -3  -5  -6   21.48    2.43
  -3  -5  -6   21.45    2.50
   3   5   6   18.17    2.22
  -4  -5  -6    2.18    1.09
  -4  -5  -6    0.78    0.76
   4   5   6    1.14    0.92
   9  -6  -6   39.60    2.75
   9  -6  -6   43.21    2.82
  -9   6   6   45.77    3.50
   8  -6  -6    7.90    1.28
   8  -6  -6    5.03    1.05
  -8   6   6    6.64    1.49
   7  -6  -6    2.95    0.78
   7  -6  -6    2.74    0.78
  -7   6   6    2.32    0.88
   6  -6  -6   53.25    2.75
   6  -6  -6   54.67    3.01
  -6   6   6   54.99    3.30
  -6   6   6   59.45    3.46
   5  -6  -6    3.73    0.85
   5  -6  -6    3.49    0.67
  -5   6   6    1.91    0.70
   4  -6  -6  311.23   10.93
   4  -6  -6  316.40   10.47
  -4   6   6  312.70   11.05
   3  -6  -6    5.57    1.08
   3  -6  -6    4.33    0.83
   2  -6  -6   67.34    3.38
   2  -6  -6   65.43    3.12
  -2   6   6   64.61    3.17
  -2   6   6   63.15    2.87
   1  -6  -6   48.88    2.86
   1  -6  -6   48.83    2.67
   0  -6  -6   65.93    3.45
   0  -6  -6   69.79    3.63
  -1  -6  -6    1.00    0.57
  -1  -6  -6    1.44    0.79
  -2  -6  -6    1.18    0.71
  -2  -6  -6    0.80    0.77
   2   6   6    0.63    0.63
  -3  -6  -6    1.21    0.77
  -3  -6  -6    2.10    1.17
   3   6   6    1.81    0.96
   9  -7  -6    2.61    0.89
   9  -7  -6    1.52    0.77
  -9   7   6    1.61    0.89
   8  -7  -6    1.28    0.60
   8  -7  -6    0.02    0.42
  -8   7   6    0.47    0.51
   7  -7  -6    2.21    0.67
   7  -7  -6    0.79    0.56
  -7   7   6    0.68    0.56
   6  -7  -6    6.49    1.16
   6  -7  -6    7.13    1.05
  -6   7   6    5.83    1.24
  -6   7   6    7.17    1.47
   5  -7  -6   45.48    2.82
  -5   7   6   52.95    3.00
   4  -7  -6   63.26    3.38
   3  -7  -6  252.95    8.90
   3  -7  -6  255.18    9.35
  -3   7   6  248.78    8.80
   2  -7  -6    4.90    1.09
   2  -7  -6    2.94    0.77
   1  -7  -6    2.40    0.82
   1  -7  -6    2.92    0.91
   0  -7  -6    6.80    1.27
   0  -7  -6    6.35    1.26
  -1  -7  -6   19.13    2.20
  -1  -7  -6   19.34    2.18
  -2  -7  -6    7.88    1.63
  -2  -7  -6    8.47    1.63
  -3  -7  -6    2.84    1.29
  -3  -7  -6    3.45    1.11
   9  -8  -6    2.71    0.99
   9  -8  -6    3.69    1.06
  -9   8   6    5.18    1.44
   8  -8  -6   33.32    2.34
   8  -8  -6   33.79    2.58
  -8   8   6   31.72    2.77
   7  -8  -6    9.37    1.67
   7  -8  -6    8.82    1.53
  -7   8   6   10.43    1.71
   6  -8  -6    5.51    1.24
   5  -8  -6   97.54    4.71
   4  -8  -6  106.07    4.95
   3  -8  -6   -0.11    0.42
   3  -8  -6    0.29    0.36
  -3   8   6   -0.44    0.35
   2  -8  -6    3.52    0.85
   2  -8  -6    3.65    0.96
   1  -8  -6   19.11    2.24
   1  -8  -6   17.14    1.97
   0  -8  -6   10.55    1.57
   0  -8  -6   19.38    2.33
  -1  -8  -6    3.36    1.06
  -1  -8  -6    1.98    1.05
   1   8   6    2.57    0.89
  -2  -8  -6    0.76    0.65
  -2  -8  -6    0.11    0.90
   2   8   6   -0.44    0.44
   8  -9  -6    5.99    1.29
   7  -9  -6    0.60    0.66
   6  -9  -6   25.23    2.57
   5  -9  -6   30.70    2.46
   4  -9  -6    4.03    1.01
   3  -9  -6    0.13    0.59
   3  -9  -6    0.36    0.45
   2  -9  -6    6.64    1.22
   2  -9  -6    8.36    1.51
   1  -9  -6    2.91    1.01
   1  -9  -6    4.09    1.10
   0  -9  -6   52.17    3.39
   0  -9  -6   62.04    3.76
  -1  -9  -6    7.74    1.72
  -1  -9  -6   10.29    1.73
   1   9   6    6.76    1.44
   8 -10  -6   27.49    3.00
   7 -10  -6   23.92    2.67
   6 -10  -6    0.23    0.60
   5 -10  -6    1.38    0.79
   4 -10  -6    0.43    0.60
   3 -10  -6   20.13    2.41
   2 -10  -6   12.30    2.00
   2 -10  -6   11.52    1.65
   1 -10  -6   12.66    1.88
   1 -10  -6   11.48    1.91
   6 -11  -6    1.65    0.91
   5 -11  -6   25.48    2.94
   4 -11  -6   80.48    4.65
   3 -11  -6   33.53    3.42
   2 -11  -6   16.86    2.41
   2  11  -7   48.24    3.37
   1  11  -7   27.41    2.86
   0  11  -7   29.63    2.42
   2 -11   7   13.05    1.91
   3 -11   7    4.74    1.28
   4 -11   7    5.58    1.36
   3  10  -7   45.10    3.24
   2  10  -7   28.98    2.45
   1  10  -7   47.78    3.10
   0  10  -7    6.62    1.36
   2 -10   7    1.65    0.84
   3 -10   7   20.67    2.37
   4 -10   7   12.44    1.85
   5 -10   7    1.58    0.83
   4   9  -7    4.94    1.26
   3   9  -7  109.95    5.34
   2   9  -7   21.89    2.38
   1   9  -7    6.97    1.34
   0   9  -7    3.20    0.92
  -1   9  -7   11.07    1.49
   2  -9   7   22.38    2.26
   3  -9   7   15.75    1.87
   4  -9   7   34.48    2.49
   4  -9   7   35.25    2.97
   5  -9   7    0.60    0.64
   5  -9   7    0.64    0.63
   5   8  -7    0.40    0.53
   4   8  -7   24.25    2.52
   3   8  -7    1.07    0.58
   2   8  -7   -0.19    0.40
   1   8  -7   24.50    1.95
   0   8  -7    9.61    1.38
  -1   8  -7   98.74    4.33
   2  -8   7   29.09    2.14
   2  -8   7   26.92    2.25
   3  -8   7   37.99    2.82
   3  -8   7   36.20    2.46
   4  -8   7   20.12    2.21
   4  -8   7   18.36    1.92
   4  -8   7   14.97    2.22
   5  -8   7    1.70    0.81
   5  -8   7    2.57    0.85
   6  -8   7    1.68    0.81
   6  -8   7    1.05    0.69
   6   7  -7    0.46    0.56
   5   7  -7    5.36    1.28
   4   7  -7   49.29    3.08
   3   7  -7   -0.16    0.35
   2   7  -7   17.16    1.88
   1   7  -7   11.24    1.38
   0   7  -7   75.18    3.59
   0  -7   7   78.87    3.86
  -1   7  -7   35.35    2.12
   1  -7   7   35.22    2.46
  -2   7  -7   13.38    1.44
   2  -7   7   11.33    1.66
   2  -7   7   11.65    1.51
   3  -7   7    5.69    1.28
   3  -7   7    7.43    1.15
   3  -7   7    7.64    1.19
   4  -7   7   21.19    2.15
   4  -7   7   23.04    2.29
   4  -7   7   23.40    1.92
   5  -7   7    1.19    0.70
   5  -7   7    1.50    0.73
   6  -7   7   40.89    2.81
   7   6  -7    3.45    1.10
   7   6  -7    0.82    0.85
   6   6  -7    2.03    0.94
   6   6  -7    0.73    0.59
   5   6  -7    4.34    1.05
   4   6  -7   32.81    2.29
   3   6  -7   48.85    2.79
   2   6  -7  225.69    8.48
  -2  -6   7  246.10   10.74
   1   6  -7   25.43    1.79
  -1  -6   7   24.91    1.97
   0   6  -7    3.40    0.79
   0  -6   7    3.80    0.95
  -1   6  -7    0.07    0.30
   1  -6   7    0.15    0.42
  -2   6  -7   25.94    1.71
  -2   6  -7   27.76    2.37
   2  -6   7   26.26    1.71
   2  -6   7   25.86    1.88
   2  -6   7   27.10    2.21
  -3   6  -7    1.24    0.76
   3  -6   7    0.34    0.43
   3  -6   7    1.50    0.69
   3  -6   7    1.21    0.70
   4  -6   7    2.22    0.76
   4  -6   7    2.53    0.96
   4  -6   7    3.74    0.94
   5  -6   7   18.64    2.04
   5  -6   7   16.12    2.31
   5  -6   7   19.54    2.06
   6  -6   7   18.25    2.19
   6  -6   7   21.30    2.23
   7   5  -7    9.37    1.62
   7   5  -7    9.85    1.63
   6   5  -7    2.58    0.84
   6   5  -7    1.78    0.78
   5   5  -7    4.17    1.00
   5   5  -7    2.65    0.77
   4   5  -7   95.47    4.30
   4   5  -7   99.02    4.41
   3   5  -7   74.81    3.49
   3   5  -7   67.54    3.48
   2   5  -7   26.41    1.78
   2   5  -7   24.29    1.86
  -2  -5   7   27.41    2.20
   1   5  -7    5.11    0.98
   1   5  -7    5.16    0.88
  -1  -5   7    5.26    1.07
   0   5  -7   46.05    2.42
   0  -5   7   46.67    2.79
  -1   5  -7   42.73    2.29
  -1   5  -7   44.22    2.88
   1  -5   7   44.66    2.77
  -2   5  -7   40.35    2.12
   2  -5   7   33.97    2.52
   2  -5   7   37.60    2.23
   2  -5   7   38.30    2.11
  -3   5  -7    0.27    0.40
   3  -5   7    0.73    0.55
   3  -5   7    0.26    0.40
   3  -5   7    0.28    0.38
   4  -5   7    2.01    0.71
   4  -5   7    1.07    0.55
   4  -5   7    1.98    0.86
   5  -5   7   62.46    4.11
   5  -5   7   61.94    3.28
   6  -5   7    7.03    1.30
   6  -5   7    5.88    1.23
   8   4  -7    0.15    0.72
   8   4  -7    0.87    0.70
   7   4  -7   23.78    2.02
   7   4  -7   23.71    2.40
   6   4  -7   50.22    2.94
   6   4  -7   49.36    2.88
  -6  -4   7   47.14    3.25
   5   4  -7    6.59    1.17
   5   4  -7    7.01    1.14
  -5  -4   7    4.84    1.18
   4   4  -7   48.16    2.65
   4   4  -7   52.29    2.74
  -4  -4   7   47.75    3.18
   3   4  -7  142.47    5.60
   3   4  -7  145.48    5.68
   2   4  -7   77.65    3.46
   2   4  -7   76.48    3.55
   1   4  -7   -0.03    0.30
   1   4  -7   -0.17    0.27
  -1  -4   7   -0.12    0.39
   0   4  -7   23.04    1.90
   0   4  -7   22.54    1.52
   0   4  -7   21.40    1.66
   0  -4   7   22.65    1.84
  -1   4  -7    6.45    1.14
  -1   4  -7    9.12    1.11
   1  -4   7    8.01    1.34
   1  -4   7    7.81    0.92
  -2   4  -7   17.38    2.18
  -2   4  -7   16.32    1.31
   2  -4   7   17.87    1.69
   2  -4   7   17.45    1.37
   2  -4   7   18.92    1.79
  -3   4  -7   17.74    1.38
  -3   4  -7   17.80    1.82
   3  -4   7   21.59    1.98
   3  -4   7   18.04    1.44
   3  -4   7   21.05    1.62
   4  -4   7    5.87    1.05
   4  -4   7    4.61    1.17
   4  -4   7    5.30    0.95
   5  -4   7    2.01    0.82
   5  -4   7    2.93    0.80
   5  -4   7    3.44    1.11
   6  -4   7    1.86    0.69
   6  -4   7    2.04    0.91
   8   3  -7    3.02    1.01
  -8  -3   7    1.42    1.13
   7   3  -7    5.70    1.15
   7   3  -7    5.36    1.12
  -7  -3   7    3.17    1.04
   6   3  -7    3.60    0.85
   6   3  -7    4.36    0.96
  -6  -3   7    2.81    0.85
   5   3  -7  404.03   13.61
   5   3  -7  403.58   13.57
  -5  -3   7  405.39   14.13
   4   3  -7    2.27    0.63
   4   3  -7    3.26    0.77
  -4  -3   7    4.13    1.06
   3   3  -7    0.79    0.40
   3   3  -7    0.82    0.47
   3   3  -7    0.98    0.42
  -3  -3   7    0.16    0.57
  -3  -3   7    0.67    0.35
   2   3  -7   21.11    1.48
   2   3  -7   24.15    1.56
   1   3  -7    0.12    0.26
   1   3  -7    0.21    0.25
   1   3  -7   -0.30    0.25
  -1  -3   7    0.09    0.45
   0   3  -7    2.59    0.64
   0   3  -7    3.42    0.79
   0   3  -7    1.98    0.63
   0  -3   7    3.32    0.53
   0  -3   7    4.33    0.96
  -1   3  -7    2.08    0.63
  -1   3  -7    2.07    0.56
   1  -3   7    1.98    0.52
   1  -3   7    2.21    0.75
  -2   3  -7  134.66    5.75
  -2   3  -7  133.37    5.04
   2  -3   7  129.52    5.00
   2  -3   7  126.45    5.05
  -3   3  -7   26.03    2.08
  -3   3  -7   23.99    1.64
   3  -3   7   26.09    2.20
   3  -3   7   24.29    1.66
   3  -3   7   25.92    1.85
   4  -3   7    2.69    0.93
   4  -3   7    3.08    0.87
   4  -3   7    4.61    0.87
   5  -3   7   32.25    2.43
   5  -3   7   30.09    2.76
   6  -3   7    3.20    1.15
   9   2  -7   16.14    2.15
  -9  -2   7   10.74    1.99
   8   2  -7   50.10    3.13
  -8  -2   7   48.96    3.46
   7   2  -7   19.34    2.02
   7   2  -7   20.21    1.71
  -7  -2   7   22.04    2.15
   6   2  -7   31.95    2.15
   6   2  -7   31.50    2.06
  -6  -2   7   35.51    2.57
   5   2  -7    4.18    0.84
   5   2  -7    7.59    1.11
  -5  -2   7    6.55    1.33
   4   2  -7   44.63    2.38
   4   2  -7   45.56    2.43
  -4  -2   7   45.49    2.82
   3   2  -7   20.48    1.33
   3   2  -7   23.44    1.51
   3   2  -7   19.42    1.40
  -3  -2   7   16.22    2.11
  -3  -2   7   21.33    1.30
   2   2  -7  301.62    9.96
   2   2  -7  292.97    9.99
  -2  -2   7  297.65    9.92
   1   2  -7    6.06    0.87
   1   2  -7    9.64    1.12
  -1  -2   7    8.31    1.35
   0   2  -7    1.10    0.39
   0   2  -7    1.79    0.57
   0   2  -7    0.93    0.35
   0  -2   7    1.55    0.64
   0  -2   7    1.07    0.37
  -1   2  -7    0.29    0.33
  -1   2  -7    0.59    0.46
  -1   2  -7    0.63    0.34
  -1   2  -7    0.52    0.35
   1  -2   7    1.29    0.57
   1  -2   7    0.80    0.37
  -2   2  -7    2.43    0.77
  -2   2  -7    3.32    0.71
   2  -2   7    3.40    0.91
   2  -2   7    2.96    0.67
  -3   2  -7  110.98    4.95
  -3   2  -7  103.93    4.37
   3  -2   7  100.25    4.52
   3  -2   7  110.42    4.28
   3  -2   7  107.93    5.15
  -4   2  -7   11.02    1.50
   4  -2   7    9.66    1.71
   4  -2   7    9.17    1.37
  -5   2  -7   90.42    4.50
   5  -2   7   82.58    4.90
   5  -2   7   89.40    4.51
  -6   2  -7   21.45    2.62
   6  -2   7   22.90    2.60
   9   1  -7   13.77    1.92
  -9  -1   7   10.57    1.96
   8   1  -7   42.67    2.75
  -8  -1   7   39.09    3.07
   7   1  -7   10.79    1.49
   7   1  -7    6.19    1.04
  -7  -1   7    8.26    1.50
   6   1  -7   10.85    1.47
   6   1  -7   10.86    1.30
  -6  -1   7   13.36    1.85
   5   1  -7    0.60    0.37
   5   1  -7    1.02    0.53
  -5  -1   7    0.78    0.51
   4   1  -7    1.45    0.51
   4   1  -7    1.42    0.49
  -4  -1   7    1.76    0.70
   3   1  -7  174.71    5.77
   3   1  -7  162.32    5.94
   3   1  -7  167.50    6.03
  -3  -1   7  147.64    6.78
  -3  -1   7  172.62    5.72
   2   1  -7   38.04    2.03
   2   1  -7   40.13    1.97
  -2  -1   7   39.10    1.93
   1   1  -7   60.40    2.48
   1   1  -7   59.85    2.75
  -1  -1   7   62.56    2.78
  -1  -1   7   59.66    2.46
  -1  -1   7   64.44    3.36
   0   1  -7   23.05    1.39
   0   1  -7   23.78    1.54
   0   1  -7   25.62    1.69
   0  -1   7   25.16    1.90
   0  -1   7   20.64    1.34
  -1   1  -7   47.44    2.34
  -1   1  -7   45.02    2.35
  -1   1  -7   46.19    2.66
   1  -1   7   48.61    2.83
   1  -1   7   47.97    2.37
  -2   1  -7   23.65    1.83
  -2   1  -7   22.23    1.57
  -2   1  -7   20.28    1.57
   2  -1   7   23.08    1.93
   2  -1   7   23.96    1.39
   2  -1   7   21.06    1.59
  -3   1  -7   27.42    2.07
  -3   1  -7   27.42    1.85
  -3   1  -7   29.10    2.05
   3  -1   7   31.01    2.37
   3  -1   7   23.18    1.86
  -4   1  -7   88.56    4.30
  -4   1  -7   87.76    4.02
   4  -1   7   85.17    4.71
   4  -1   7   89.79    4.32
  -5   1  -7    8.76    1.60
   5  -1   7    7.88    1.45
   5  -1   7    6.36    1.47
  -6   1  -7   54.06    3.55
   6  -1   7   50.75    3.48
   9   0  -7   10.88    1.78
  -9   0   7    6.79    1.67
   8   0  -7    7.31    1.33
  -8   0   7    7.94    1.62
   7   0  -7    0.73    0.52
  -7   0   7    0.63    0.55
   6   0  -7    0.06    0.23
   6   0  -7    0.09    0.34
  -6   0   7    0.19    0.46
   5   0  -7    0.99    0.42
   5   0  -7    0.83    0.41
  -5   0   7    0.08    0.42
   4   0  -7  105.61    4.17
   4   0  -7  101.49    4.13
  -4   0   7  101.35    4.41
  -4   0   7  113.72    4.86
   3   0  -7  137.28    5.12
   3   0  -7  136.43    5.02
   3   0  -7  143.61    4.77
  -3   0   7  129.93    5.94
  -3   0   7  140.37    5.49
  -3   0   7  134.14    4.70
   2   0  -7   52.63    2.36
   2   0  -7   54.66    2.40
   2   0  -7   49.51    2.45
   2   0  -7   55.06    2.22
  -2   0   7   51.80    2.76
  -2   0   7   56.47    2.39
   1   0  -7    9.79    0.86
   1   0  -7    9.92    1.17
  -1   0   7   10.38    1.04
  -1   0   7   14.00    1.78
  -1   0   7   10.37    0.96
   0   0  -7   19.82    1.36
   0   0  -7   20.71    1.44
   0   0  -7   18.30    1.45
   0   0   7   23.20    1.81
   0   0   7   21.36    1.37
  -1   0  -7    7.82    1.08
  -1   0  -7    6.98    1.16
  -1   0  -7    9.09    1.14
   1   0   7    7.63    1.27
   1   0   7    7.52    1.00
  -2   0  -7    0.27    0.37
  -2   0  -7   -0.05    0.34
   2   0   7    0.42    0.49
   2   0   7    0.26    0.45
  -3   0  -7   12.28    1.60
  -3   0  -7    9.88    1.28
  -3   0  -7   12.35    1.59
   3   0   7    8.75    1.48
   3   0   7   13.20    1.58
  -4   0  -7   20.66    2.24
  -4   0  -7   22.44    1.82
   4   0   7   23.54    2.37
   4   0   7   19.88    2.38
  -5   0  -7   39.65    2.90
   5   0   7   39.63    2.87
  -6   0  -7    0.58    0.73
   6   0   7    0.34    0.77
   9  -1  -7   -0.23    0.50
  -9   1   7    0.74    0.70
  -8   1   7   16.78    2.36
   7  -1  -7    3.96    0.94
  -7   1   7    3.65    1.14
   6  -1  -7   82.49    3.42
   6  -1  -7   75.88    3.54
  -6   1   7   80.12    4.15
  -6   1   7   75.53    3.64
   5  -1  -7   16.55    1.32
   5  -1  -7   16.69    1.24
  -5   1   7   19.90    1.58
  -5   1   7   19.04    1.74
   4  -1  -7  136.62    5.07
   4  -1  -7  136.89    5.07
  -4   1   7  139.57    5.77
  -4   1   7  133.50    5.51
   3  -1  -7   82.87    3.25
   3  -1  -7   81.63    3.09
   3  -1  -7   81.99    3.15
   3  -1  -7   79.42    3.35
   3  -1  -7   79.70    3.03
  -3   1   7   80.18    4.18
  -3   1   7   83.51    3.50
   2  -1  -7    1.03    0.38
   2  -1  -7    0.87    0.37
   2  -1  -7    1.05    0.41
   2  -1  -7    0.35    0.25
   2  -1  -7    1.01    0.34
  -2   1   7   -0.29    0.47
  -2   1   7    0.47    0.35
  -2   1   7    0.77    0.30
   1  -1  -7   32.09    1.76
   1  -1  -7   35.86    1.93
   1  -1  -7   31.30    1.86
  -1   1   7   31.58    1.84
  -1   1   7   34.43    2.17
  -1   1   7   31.22    1.76
  -1   1   7   34.28    2.33
   0  -1  -7    2.23    0.60
   0  -1  -7    3.57    0.72
   0  -1  -7    2.96    0.76
   0   1   7    2.84    0.81
   0   1   7    2.15    0.59
  -1  -1  -7    4.15    0.79
  -1  -1  -7    4.46    0.88
   1   1   7    4.26    0.94
   1   1   7    4.05    0.82
  -2  -1  -7   11.46    1.43
  -2  -1  -7   10.32    1.30
   2   1   7   15.93    1.69
   2   1   7    9.34    1.50
  -3  -1  -7   34.06    2.29
  -3  -1  -7   38.38    2.58
   3   1   7   38.16    2.49
   3   1   7   42.33    2.84
  -4  -1  -7    0.30    0.55
  -4  -1  -7    2.14    0.71
   4   1   7    0.07    0.54
   4   1   7    0.70    0.64
  -5  -1  -7    8.53    1.55
  -5  -1  -7   11.44    1.60
   5   1   7   13.58    2.02
  10  -2  -7    0.43    0.62
 -10   2   7    0.95    0.89
   9  -2  -7    7.14    1.44
  -9   2   7    8.49    1.78
   8  -2  -7    5.55    1.11
  -8   2   7    3.80    1.14
   7  -2  -7   75.88    3.64
  -7   2   7   74.08    4.22
   6  -2  -7  156.76    5.96
  -6   2   7  157.37    6.63
  -6   2   7  150.82    6.16
   5  -2  -7   46.57    2.28
   5  -2  -7   45.99    2.35
  -5   2   7   45.76    2.67
  -5   2   7   50.86    2.95
   4  -2  -7    3.83    0.67
   4  -2  -7    4.14    0.69
   4  -2  -7    5.21    0.79
  -4   2   7    3.95    0.96
  -4   2   7    4.08    0.88
   3  -2  -7   23.23    1.50
   3  -2  -7   25.03    1.29
   3  -2  -7   26.51    1.42
   3  -2  -7   22.32    1.43
  -3   2   7   21.68    2.09
  -3   2   7   25.48    1.84
   2  -2  -7   47.91    2.08
   2  -2  -7   51.61    2.39
   2  -2  -7   50.42    2.33
   2  -2  -7   49.35    2.42
   2  -2  -7   44.77    2.25
  -2   2   7   51.94    2.80
   1  -2  -7   44.74    2.30
   1  -2  -7   45.36    2.35
  -1   2   7   45.28    2.29
  -1   2   7   46.49    2.74
   0  -2  -7   -0.12    0.25
   0  -2  -7    0.15    0.37
   0  -2  -7   -0.22    0.25
   0   2   7    0.22    0.38
   0   2   7   -0.18    0.39
  -1  -2  -7   73.17    3.54
  -1  -2  -7   73.90    3.45
   1   2   7   69.70    3.45
   1   2   7   73.16    3.72
  -2  -2  -7   31.51    2.27
  -2  -2  -7   38.87    2.29
   2   2   7   31.11    2.33
   2   2   7   32.43    2.23
  -3  -2  -7    3.17    0.93
  -3  -2  -7    5.03    1.05
   3   2   7    4.66    1.10
   3   2   7    3.75    0.97
  -4  -2  -7   17.01    1.99
  -4  -2  -7   18.36    2.33
   4   2   7   21.45    2.31
   4   2   7   17.75    2.34
  -5  -2  -7   10.34    1.71
  -5  -2  -7   11.91    2.06
   5   2   7   12.05    1.88
  10  -3  -7    6.44    1.31
 -10   3   7    6.02    1.60
   9  -3  -7    1.16    0.70
  -9   3   7    1.84    0.96
   8  -3  -7   29.12    2.19
  -8   3   7   35.23    2.84
   7  -3  -7  179.56    6.89
  -7   3   7  180.84    7.71
   6  -3  -7   -0.14    0.29
   6  -3  -7    0.25    0.32
  -6   3   7    0.13    0.35
  -6   3   7    0.06    0.33
   5  -3  -7    0.12    0.25
   5  -3  -7    0.30    0.31
   5  -3  -7    0.08    0.28
  -5   3   7    0.73    0.49
  -5   3   7    0.17    0.38
   4  -3  -7   94.61    3.75
   4  -3  -7   87.72    3.74
   4  -3  -7   95.16    3.64
  -4   3   7   98.09    4.45
  -4   3   7   86.96    4.25
   3  -3  -7   23.71    1.50
   3  -3  -7   21.37    1.46
   3  -3  -7   21.54    1.25
  -3   3   7   21.27    2.00
  -3   3   7   21.91    1.78
   2  -3  -7   47.95    2.43
   2  -3  -7   47.85    2.36
   2  -3  -7   44.06    2.35
   2  -3  -7   46.70    2.31
  -2   3   7   46.31    2.32
  -2   3   7   50.23    2.88
   1  -3  -7   21.15    1.50
   1  -3  -7   18.73    1.49
   1  -3  -7   17.79    1.43
  -1   3   7   17.20    1.65
   0  -3  -7   14.75    1.63
   0  -3  -7    9.63    1.25
   0   3   7   10.43    1.44
   0   3   7    9.35    1.27
  -1  -3  -7    5.24    1.02
  -1  -3  -7    4.75    0.97
   1   3   7    6.70    1.18
   1   3   7    3.62    0.91
  -2  -3  -7    5.81    1.20
  -2  -3  -7    7.81    1.27
   2   3   7    8.47    1.42
  -3  -3  -7    7.02    1.28
  -3  -3  -7    5.27    1.24
   3   3   7    8.52    1.55
  -4  -3  -7    7.42    1.57
  -4  -3  -7    6.29    1.32
   4   3   7    7.79    1.64
  -5  -3  -7   22.17    2.48
  -5  -3  -7   25.11    2.84
   5   3   7   31.06    3.19
  10  -4  -7    1.15    0.80
 -10   4   7    1.58    0.97
   9  -4  -7   53.66    3.21
  -9   4   7   48.12    3.66
   8  -4  -7    7.02    1.28
  -8   4   7    6.80    1.48
   7  -4  -7    4.57    0.96
  -7   4   7    3.59    1.01
   6  -4  -7   48.04    2.54
   6  -4  -7   49.07    2.57
  -6   4   7   51.01    3.15
  -6   4   7   47.37    2.96
   5  -4  -7   15.88    1.24
   5  -4  -7   19.69    1.45
   5  -4  -7   17.69    1.26
  -5   4   7   17.84    1.69
  -5   4   7   17.13    1.69
   4  -4  -7   83.64    3.61
   4  -4  -7   81.71    3.25
  -4   4   7   86.40    4.13
  -4   4   7   74.04    3.96
   3  -4  -7   10.43    1.22
   3  -4  -7   10.21    1.26
  -3   4   7    7.93    1.58
  -3   4   7   10.20    1.42
   2  -4  -7   89.22    3.98
   2  -4  -7   92.71    3.95
   2  -4  -7   95.86    3.98
   1  -4  -7    0.09    0.30
   1  -4  -7    0.20    0.36
   1  -4  -7   -0.52    0.35
  -1   4   7   -0.09    0.41
   0  -4  -7    5.72    1.08
   0  -4  -7    6.67    1.15
   0   4   7    5.64    1.09
   0   4   7    5.79    1.09
  -1  -4  -7   21.66    2.24
  -1  -4  -7   24.55    1.88
   1   4   7   19.21    2.08
  -2  -4  -7    4.13    1.08
  -2  -4  -7    4.12    1.10
   2   4   7    3.55    0.98
  -3  -4  -7   18.43    2.32
  -3  -4  -7   21.64    2.34
   3   4   7   17.42    2.18
  -4  -4  -7    0.32    0.86
  -4  -4  -7    0.52    0.69
   4   4   7   -0.59    0.63
   9  -5  -7   10.16    1.66
  -9   5   7    8.92    1.89
   8  -5  -7    7.78    1.31
  -8   5   7    7.36    1.55
   7  -5  -7    5.86    1.02
   7  -5  -7    4.87    0.98
  -7   5   7    4.50    1.11
   6  -5  -7    6.74    1.08
   6  -5  -7    8.02    1.11
  -6   5   7    7.05    1.33
  -6   5   7    6.76    1.28
   5  -5  -7   54.05    2.53
   5  -5  -7   51.64    2.79
  -5   5   7   55.46    3.27
  -5   5   7   51.21    3.09
   4  -5  -7   31.36    2.09
  -4   5   7   35.07    2.55
  -4   5   7   34.69    2.50
   3  -5  -7  208.52    7.69
   3  -5  -7  224.15    7.98
   2  -5  -7    8.40    1.18
   2  -5  -7    6.40    1.08
   2  -5  -7    8.48    1.20
  -2   5   7   10.18    1.62
  -2   5   7    7.88    1.12
   1  -5  -7    0.10    0.33
   1  -5  -7    0.12    0.43
   0  -5  -7   14.45    1.84
   0  -5  -7   10.28    1.44
  -1  -5  -7    0.06    0.57
  -1  -5  -7   -0.03    0.44
   1   5   7    1.23    0.62
  -2  -5  -7    9.83    1.68
  -2  -5  -7    8.91    1.49
   2   5   7    9.00    1.59
  -3  -5  -7    2.86    0.97
  -3  -5  -7    2.76    1.25
   3   5   7    3.68    1.21
   9  -6  -7    2.72    0.95
   8  -6  -7    5.49    1.09
   8  -6  -7    6.22    1.21
  -8   6   7    5.09    1.33
   7  -6  -7   26.84    2.03
   7  -6  -7   29.31    1.97
  -7   6   7   25.00    2.30
   6  -6  -7   36.74    2.17
   6  -6  -7   42.07    2.55
  -6   6   7   40.52    2.80
  -6   6   7   37.51    2.78
   5  -6  -7   26.97    1.98
  -5   6   7   27.46    2.21
   4  -6  -7    0.83    0.54
   4  -6  -7    0.12    0.30
  -4   6   7    0.20    0.56
   3  -6  -7    2.51    0.80
   3  -6  -7    2.44    0.62
   2  -6  -7   59.07    3.07
   2  -6  -7   58.38    3.24
   1  -6  -7   90.12    4.16
   1  -6  -7   86.56    4.30
   0  -6  -7   17.33    1.91
   0  -6  -7   12.81    1.74
  -1  -6  -7   13.37    1.75
  -1  -6  -7   16.77    2.08
  -2  -6  -7   94.83    4.84
  -2  -6  -7  101.47    5.13
   2   6   7   97.83    5.09
  -3  -6  -7   14.33    2.05
  -3  -6  -7   14.33    2.21
   3   6   7   12.80    2.10
   9  -7  -7    0.12    0.51
   9  -7  -7    0.63    0.61
  -9   7   7   -0.10    0.57
   8  -7  -7   28.59    2.08
   8  -7  -7   24.38    2.13
  -8   7   7   26.33    2.51
   7  -7  -7   26.11    1.83
   7  -7  -7   19.35    2.12
  -7   7   7   21.71    2.55
   6  -7  -7   70.38    3.72
  -6   7   7   70.76    3.95
   5  -7  -7   12.10    1.67
   4  -7  -7    7.34    1.24
   3  -7  -7   29.12    2.24
   3  -7  -7   29.26    2.00
  -3   7   7   31.78    3.41
   2  -7  -7   11.78    1.70
   2  -7  -7    9.46    1.38
   1  -7  -7   34.55    2.41
   1  -7  -7   39.73    2.71
   0  -7  -7    3.12    0.89
   0  -7  -7    2.54    1.02
  -1  -7  -7    9.22    1.62
  -1  -7  -7    7.61    1.40
  -2  -7  -7    2.89    1.02
  -2  -7  -7    2.31    1.15
   9  -8  -7    6.23    1.38
   9  -8  -7    4.95    1.14
  -9   8   7    6.53    1.67
   8  -8  -7    5.61    1.22
  -8   8   7    5.37    1.44
   7  -8  -7   51.68    3.21
  -7   8   7   48.39    3.35
   6  -8  -7   17.35    2.05
   5  -8  -7   26.14    2.61
   4  -8  -7   21.68    2.31
   3  -8  -7    6.22    1.12
   3  -8  -7    7.94    1.47
   2  -8  -7    8.69    1.45
   2  -8  -7   11.74    1.80
   1  -8  -7   25.35    2.71
   1  -8  -7   20.65    2.27
   0  -8  -7    0.26    0.61
   0  -8  -7    1.21    0.91
  -1  -8  -7    1.54    1.03
  -1  -8  -7    1.55    0.77
   8  -9  -7   37.47    2.89
   7  -9  -7    3.72    1.01
   6  -9  -7    4.01    1.13
   5  -9  -7   10.42    1.73
   4  -9  -7    0.23    0.53
   3  -9  -7   -0.23    0.42
   3  -9  -7    0.09    0.56
   2  -9  -7    6.47    1.29
   1  -9  -7   40.46    3.02
   1  -9  -7   33.02    2.58
   0  -9  -7    0.58    0.85
   0  -9  -7    1.31    0.80
   7 -10  -7    2.96    1.02
   6 -10  -7   13.41    1.98
   5 -10  -7    8.89    1.71
   4 -10  -7    2.55    1.04
   3 -10  -7    5.48    1.40
   2 -10  -7   30.04    2.41
   2 -10  -7   27.86    3.00
   1  11  -8   15.59    2.20
   0  11  -8   -0.51    0.57
   2 -11   8    0.81    0.75
   3  10  -8   24.24    2.79
   2  10  -8    5.60    1.37
   1  10  -8    0.47    0.69
   0  10  -8    6.02    1.22
   2 -10   8    4.72    1.15
   3 -10   8   46.15    3.13
   4 -10   8    0.70    0.70
   4   9  -8   75.87    4.37
   3   9  -8    0.78    0.74
   2   9  -8    9.86    1.61
   1   9  -8   12.16    1.70
   0   9  -8   79.42    4.01
  -1   9  -8    3.07    0.94
   2  -9   8    0.30    0.55
   3  -9   8   37.32    2.67
   3  -9   8   38.39    4.89
   4  -9   8   -0.32    0.59
   4  -9   8   -0.01    0.50
   5  -9   8    0.41    0.63
   5   8  -8    3.12    1.03
   4   8  -8    1.52    0.82
   3   8  -8    4.65    1.09
   2   8  -8    4.18    1.06
   1   8  -8    0.27    0.46
   0   8  -8   32.37    2.26
  -1   8  -8   35.67    2.32
   2  -8   8    8.42    1.39
   2  -8   8    7.51    1.40
   3  -8   8   29.21    2.24
   3  -8   8   28.64    2.57
   4  -8   8    0.71    0.63
   4  -8   8    2.38    1.00
   5  -8   8   10.70    1.67
   5  -8   8   11.31    1.79
   6   7  -8    3.10    1.03
   5   7  -8    4.67    1.22
   4   7  -8   12.27    1.73
   3   7  -8    6.57    1.25
   2   7  -8   10.67    1.48
   1   7  -8   10.50    1.46
   0   7  -8   58.84    3.11
   0  -7   8   61.54    3.51
  -1   7  -8   21.30    1.68
   1  -7   8   20.20    2.01
   2  -7   8    2.81    0.95
   2  -7   8    2.09    0.74
   3  -7   8   20.86    2.20
   3  -7   8   21.34    2.56
   4  -7   8   86.93    4.29
   4  -7   8   83.89    4.92
   4  -7   8   84.03    4.20
   5  -7   8   16.62    2.50
   5  -7   8   16.00    1.92
   5  -7   8   17.18    2.06
   7   6  -8    2.05    0.96
   7   6  -8    1.79    0.97
   6   6  -8    1.50    0.89
   6   6  -8   -0.36    0.48
   5   6  -8   16.85    2.04
   4   6  -8   38.36    2.58
   3   6  -8    0.80    0.52
   2   6  -8   56.14    2.98
  -2  -6   8   48.79    3.11
   1   6  -8   15.53    1.67
  -1  -6   8   15.12    1.91
   0   6  -8   -0.62    0.29
   0  -6   8   -0.12    0.53
  -1   6  -8   44.76    2.47
   1  -6   8   40.96    2.87
  -2   6  -8   16.57    1.40
   2  -6   8   16.74    2.17
   2  -6   8   14.00    1.68
  -3   6  -8    0.85    0.65
   3  -6   8    0.75    0.53
   3  -6   8    1.02    0.59
   3  -6   8    0.39    0.61
   4  -6   8   42.86    2.80
   4  -6   8   43.63    2.76
   4  -6   8   50.25    3.54
   5  -6   8   18.00    2.12
   5  -6   8   23.47    2.30
   5  -6   8   22.30    3.02
   6  -6   8    5.34    1.30
   6  -6   8    7.01    1.36
   7   5  -8   20.56    2.30
   7   5  -8   21.12    2.32
   6   5  -8    4.48    1.07
   6   5  -8    3.81    1.10
   5   5  -8   18.27    2.04
   5   5  -8   18.57    2.05
   4   5  -8    1.75    0.69
  -4  -5   8    0.17    0.85
  -3  -5   8   83.49    4.69
   2   5  -8   10.64    1.33
  -2  -5   8   10.74    1.59
   1   5  -8   22.06    1.65
  -1  -5   8   24.14    2.05
   0   5  -8   44.17    2.45
   0  -5   8   47.14    2.95
  -1   5  -8   10.23    1.26
   1  -5   8   12.91    1.88
  -2   5  -8   16.83    2.28
  -2   5  -8   18.55    1.49
   2  -5   8   18.79    2.26
   2  -5   8   16.81    1.41
   2  -5   8   20.17    1.61
  -3   5  -8    5.10    1.39
   3  -5   8    5.35    1.26
   3  -5   8    4.42    0.98
   3  -5   8    4.32    0.93
   4  -5   8   19.62    2.55
   4  -5   8   17.38    1.89
   4  -5   8   18.20    1.92
   5  -5   8   25.30    2.00
   5  -5   8   22.76    2.91
   6  -5   8    2.40    1.01
   6  -5   8    2.94    0.89
   8   4  -8   74.64    4.18
   8   4  -8   78.72    4.29
   7   4  -8    0.44    0.72
   7   4  -8    1.12    0.62
   6   4  -8   31.98    2.34
   6   4  -8   35.24    2.41
  -6  -4   8   34.00    2.78
   5   4  -8   51.32    2.91
   5   4  -8   54.77    2.98
  -5  -4   8   47.95    3.45
   4   4  -8    1.52    0.59
   4   4  -8    1.13    0.54
  -4  -4   8    0.72    1.05
   3   4  -8    8.39    1.19
   3   4  -8    8.86    1.20
  -3  -4   8    4.67    1.28
   2   4  -8    8.91    1.24
   2   4  -8    7.25    1.06
  -2  -4   8    8.29    1.54
   1   4  -8    4.26    0.90
   1   4  -8    7.21    1.02
  -1  -4   8    4.92    1.12
   0   4  -8   66.08    3.14
   0  -4   8   67.42    3.66
  -1   4  -8   53.98    2.74
  -1   4  -8   54.89    3.36
   1  -4   8   55.24    2.97
   1  -4   8   55.30    3.32
  -2   4  -8    2.52    0.81
  -2   4  -8    3.15    0.75
   2  -4   8    2.87    0.73
   2  -4   8    3.19    0.75
   2  -4   8    2.68    0.85
  -3   4  -8   17.54    2.26
  -3   4  -8   22.53    1.62
   3  -4   8   18.68    1.52
   3  -4   8   17.44    1.77
   3  -4   8   18.08    2.21
   4  -4   8    5.57    1.13
   4  -4   8    5.93    1.43
   4  -4   8    6.62    1.13
   5  -4   8   20.29    2.70
   5  -4   8   19.19    2.23
   5  -4   8   18.54    2.23
   6  -4   8    0.06    0.72
   8   3  -8   24.00    2.47
  -8  -3   8   25.34    3.02
   7   3  -8   18.51    2.06
   7   3  -8   13.45    1.79
  -7  -3   8   18.66    2.43
   6   3  -8   41.85    2.60
   6   3  -8   39.63    2.50
  -6  -3   8   37.78    2.84
   5   3  -8   31.30    2.11
   5   3  -8   32.55    2.15
  -5  -3   8   29.51    2.53
   4   3  -8   67.07    3.11
   4   3  -8   60.81    3.02
  -4  -3   8   46.63    3.52
   3   3  -8    0.34    0.35
   3   3  -8    0.47    0.35
  -3  -3   8    0.32    0.64
   2   3  -8    3.86    0.81
   2   3  -8    1.97    0.58
  -2  -3   8    1.10    0.81
   1   3  -8   81.43    3.74
   1   3  -8   77.84    3.57
  -1  -3   8   86.07    4.22
   0   3  -8   43.42    2.41
   0   3  -8   46.86    2.85
   0   3  -8   49.16    2.93
   0  -3   8   49.37    3.01
  -1   3  -8   62.52    2.96
  -1   3  -8   65.67    2.85
  -1   3  -8   47.57    3.17
   1  -3   8   61.93    2.81
   1  -3   8   63.65    3.54
  -2   3  -8    5.24    1.14
  -2   3  -8    4.98    0.89
   2  -3   8    3.28    0.71
   2  -3   8    4.05    0.84
   2  -3   8    5.21    1.20
  -3   3  -8   23.27    2.08
  -3   3  -8   21.60    1.63
   3  -3   8   22.12    1.76
   3  -3   8   21.88    1.60
   3  -3   8   15.82    2.07
   4  -3   8   55.40    3.28
   4  -3   8   60.17    3.90
  -5   3  -8   21.80    2.42
   5  -3   8   27.87    2.75
   5  -3   8   16.94    2.41
  -6   3  -8    8.39    1.68
   6  -3   8    6.97    1.54
   8   2  -8    2.80    1.00
  -8  -2   8    3.20    1.14
   7   2  -8   15.78    1.93
   7   2  -8   15.41    1.80
  -7  -2   8   17.89    2.39
   6   2  -8   59.32    2.99
   6   2  -8   54.16    2.98
  -6  -2   8   49.59    3.34
   5   2  -8   25.26    1.96
   5   2  -8   26.77    1.86
  -5  -2   8   31.46    2.45
   4   2  -8  239.52    8.43
   4   2  -8  236.84    8.38
  -4  -2   8  233.38    9.47
   3   2  -8   -0.13    0.24
   3   2  -8   -0.37    0.35
   3   2  -8   -0.21    0.30
  -3  -2   8   -0.13    0.54
   2   2  -8    0.29    0.37
   2   2  -8   -0.14    0.20
  -2  -2   8   -0.46    0.50
   1   2  -8   87.64    3.83
   1   2  -8   88.85    3.94
  -1  -2   8   95.58    4.49
   0   2  -8    3.77    0.83
   0   2  -8    4.63    0.71
   0   2  -8    5.82    0.95
   0  -2   8    4.70    0.73
   0  -2   8    5.38    1.13
  -1   2  -8   15.50    1.58
  -1   2  -8   14.72    1.23
  -1   2  -8   11.91    1.57
   1  -2   8   17.71    2.05
   1  -2   8   17.44    1.32
  -2   2  -8   11.10    1.40
  -2   2  -8   11.32    1.68
  -2   2  -8   12.21    1.45
   2  -2   8    8.89    1.22
   2  -2   8   12.99    1.31
   2  -2   8   11.57    1.77
  -3   2  -8    6.65    1.24
  -3   2  -8    7.51    1.20
  -3   2  -8    6.49    1.44
   3  -2   8    6.26    1.35
   3  -2   8    6.65    1.15
  -4   2  -8    3.50    1.01
   4  -2   8    2.20    0.90
   4  -2   8    3.21    0.96
  -5   2  -8   60.89    3.67
   5  -2   8   57.72    3.60
   5  -2   8   58.44    4.10
  -6   2  -8    6.52    1.46
   6  -2   8    5.17    1.40
   9   1  -8    3.99    1.14
  -9  -1   8    3.11    1.20
   8   1  -8    0.36    0.54
  -8  -1   8    0.88    0.69
   7   1  -8   11.99    1.59
   7   1  -8   12.97    1.56
  -7  -1   8   12.81    1.96
   6   1  -8    2.04    0.65
   6   1  -8    2.04    0.72
  -6  -1   8    3.20    0.96
   5   1  -8   29.22    1.92
   5   1  -8   27.43    1.85
  -5  -1   8   29.45    2.37
   4   1  -8   15.32    1.29
   4   1  -8   18.89    1.42
  -4  -1   8   14.94    1.97
   3   1  -8   28.49    1.73
   3   1  -8   26.59    1.74
   2   1  -8  115.97    4.65
   2   1  -8  116.91    4.56
  -2  -1   8  116.91    4.50
   1   1  -8    5.10    0.92
   1   1  -8    4.07    0.66
   1   1  -8    5.86    0.94
  -1  -1   8    3.80    0.64
  -1  -1   8    5.31    1.20
   0   1  -8   60.79    3.13
   0   1  -8   60.83    2.79
   0   1  -8   64.65    3.02
   0  -1   8   65.71    3.53
   0  -1   8   60.24    2.77
  -1   1  -8   23.08    1.61
  -1   1  -8   24.97    1.68
   1  -1   8   21.71    1.93
   1  -1   8   22.30    1.42
   1  -1   8   19.13    1.50
  -2   1  -8    0.60    0.43
  -2   1  -8   -0.10    0.33
   2  -1   8   -0.13    0.35
   2  -1   8    0.41    0.49
  -3   1  -8    9.79    1.40
  -3   1  -8    9.18    1.40
   3  -1   8    7.48    1.48
   3  -1   8    8.15    1.31
  -4   1  -8   14.52    1.94
  -4   1  -8   18.81    1.97
   4  -1   8   18.86    2.13
   4  -1   8   22.21    2.79
  -5   1  -8   47.44    3.22
   5  -1   8   43.27    3.14
   5  -1   8   41.14    3.40
   9   0  -8   -0.16    0.52
  -9   0   8    0.44    0.65
   8   0  -8   26.83    2.16
  -8   0   8   28.08    2.61
   7   0  -8   59.02    3.25
  -7   0   8   63.42    3.85
   6   0  -8    0.54    0.42
   6   0  -8    0.14    0.43
  -6   0   8   -0.07    0.60
   5   0  -8   -0.28    0.33
  -5   0   8    0.51    0.61
   4   0  -8   31.64    1.85
   4   0  -8   31.16    1.86
  -4   0   8   27.47    2.41
   3   0  -8    3.27    0.63
   3   0  -8    3.34    0.73
  -3   0   8    0.56    0.77
   2   0  -8   69.37    3.17
   2   0  -8   69.78    3.06
   2   0  -8   68.87    2.81
  -2   0   8   71.83    3.06
   1   0  -8    0.00    0.21
   1   0  -8    0.11    0.29
   1   0  -8    0.04    0.29
  -1   0   8   -0.11    0.43
  -1   0   8    0.28    0.33
   0   0  -8  211.42    7.40
   0   0  -8  199.10    7.57
   0   0  -8  211.51    7.29
   0   0   8  199.07    7.87
   0   0   8  190.54    7.12
  -1   0  -8   26.83    1.83
  -1   0  -8   23.17    1.72
   1   0   8   23.51    2.06
   1   0   8   23.18    1.69
  -2   0  -8    8.85    1.41
  -2   0  -8   11.02    1.54
  -2   0  -8   12.29    1.52
   2   0   8    8.57    1.24
   2   0   8   10.43    1.58
  -3   0  -8   28.81    2.20
  -3   0  -8   29.54    2.10
   3   0   8   24.40    2.05
   3   0   8   26.68    2.39
  -4   0  -8   30.69    2.44
  -4   0  -8   26.06    2.13
   4   0   8   27.60    2.59
   4   0   8   29.89    2.40
  -5   0  -8    4.95    1.39
   5   0   8    3.96    1.21
   9  -1  -8    4.23    1.23
  -9   1   8    2.53    1.17
   8  -1  -8   15.11    1.90
  -8   1   8   14.79    2.20
   7  -1  -8    3.25    0.86
  -7   1   8    3.19    1.04
   6  -1  -8   21.06    1.69
  -6   1   8   24.09    1.87
  -6   1   8   21.51    2.14
   5  -1  -8  158.66    5.89
   5  -1  -8  154.67    5.81
  -5   1   8  147.98    6.52
  -5   1   8  155.91    6.31
   4  -1  -8    0.31    0.36
   4  -1  -8    0.47    0.37
  -4   1   8   -0.20    0.62
  -4   1   8    0.72    0.44
   3  -1  -8    1.81    0.47
   3  -1  -8    1.04    0.41
   3  -1  -8    0.98    0.46
  -3   1   8    0.91    0.46
  -3   1   8    0.77    0.70
   2  -1  -8    0.33    0.32
   2  -1  -8    0.78    0.36
   2  -1  -8    0.67    0.43
   2  -1  -8    0.47    0.38
  -2   1   8    0.36    0.35
  -2   1   8    0.32    0.27
  -2   1   8    0.85    0.70
   1  -1  -8   30.35    1.86
   1  -1  -8   22.67    1.70
   1  -1  -8   29.68    1.76
  -1   1   8   29.99    2.27
  -1   1   8   31.23    1.80
   0  -1  -8   80.63    5.04
   0  -1  -8   85.17    3.68
   0  -1  -8   83.12    3.71
   0   1   8   78.34    4.06
   0   1   8   80.77    3.62
  -1  -1  -8   28.96    2.01
  -1  -1  -8   29.86    1.99
   1   1   8   23.44    2.09
   1   1   8   28.59    1.95
  -2  -1  -8    5.38    1.08
  -2  -1  -8    6.55    1.31
   2   1   8    4.60    1.09
   2   1   8    6.07    1.15
  -3  -1  -8   35.18    2.53
  -3  -1  -8   32.92    2.31
   3   1   8   31.23    2.40
   3   1   8   30.26    2.55
  -4  -1  -8    0.40    0.65
  -4  -1  -8    0.14    0.57
   4   1   8   -0.23    0.58
   4   1   8    0.07    0.54
  -5  -1  -8    1.09    0.89
   5   1   8    1.37    0.93
   9  -2  -8   49.47    3.21
  -9   2   8   53.51    3.89
   8  -2  -8    1.29    0.70
  -8   2   8    1.08    0.75
   7  -2  -8   40.12    2.46
  -7   2   8   39.22    2.94
   6  -2  -8   63.40    2.90
   6  -2  -8   58.95    3.00
  -6   2   8   59.09    3.31
  -6   2   8   60.30    3.66
   5  -2  -8   37.02    2.04
   5  -2  -8   38.34    2.10
  -5   2   8   35.03    2.57
  -5   2   8   35.24    2.40
   4  -2  -8    6.41    0.83
   4  -2  -8    6.19    0.95
   4  -2  -8    6.26    0.89
  -4   2   8    6.36    1.37
  -4   2   8    7.25    1.23
   3  -2  -8   19.16    1.39
   3  -2  -8   21.39    1.42
   3  -2  -8   18.78    1.42
  -3   2   8   19.12    1.69
   2  -2  -8  111.85    4.39
   2  -2  -8  110.69    4.33
   2  -2  -8  104.02    4.42
   1  -2  -8   -0.03    0.34
   1  -2  -8    0.21    0.41
   1  -2  -8    0.86    0.48
  -1   2   8    0.31    0.39
  -1   2   8    0.15    0.55
   0  -2  -8    7.54    1.23
   0  -2  -8    5.15    1.00
   0   2   8    4.49    0.91
   0   2   8    6.57    1.28
  -1  -2  -8    2.02    0.82
  -1  -2  -8    1.09    0.60
   1   2   8    1.21    0.71
   1   2   8    1.56    0.70
  -2  -2  -8   36.94    2.62
  -2  -2  -8   34.85    2.40
   2   2   8   36.80    2.52
   2   2   8   38.16    2.72
  -3  -2  -8    6.31    1.22
  -3  -2  -8    6.25    1.43
   3   2   8    9.90    1.67
   3   2   8    6.56    1.37
  -4  -2  -8    1.55    0.83
  -4  -2  -8    2.96    1.13
   4   2   8    1.27    0.95
   4   2   8    2.13    0.93
   9  -3  -8    0.52    0.59
  -9   3   8    0.42    0.60
   8  -3  -8    9.45    1.50
  -8   3   8    8.99    1.74
   7  -3  -8   62.39    3.19
  -7   3   8   57.86    3.70
   6  -3  -8   99.21    4.02
  -6   3   8   88.06    4.58
  -6   3   8   79.38    4.23
   5  -3  -8   85.42    3.60
   5  -3  -8   82.66    3.60
  -5   3   8   85.05    4.34
  -5   3   8   84.21    4.21
   4  -3  -8   39.63    2.13
   4  -3  -8   36.22    2.06
   4  -3  -8   38.30    1.95
  -4   3   8   32.85    2.38
  -4   3   8   35.06    2.73
   3  -3  -8   38.92    2.09
   3  -3  -8   35.54    2.05
  -3   3   8   29.83    2.28
   2  -3  -8   20.92    1.60
   2  -3  -8   24.84    1.70
   2  -3  -8   23.21    1.60
  -2   3   8   18.92    2.36
   1  -3  -8   40.25    2.43
   1  -3  -8   44.07    2.48
   1  -3  -8   42.48    2.42
  -1   3   8   39.62    2.70
   0  -3  -8   32.17    2.19
   0  -3  -8   32.03    2.11
   0   3   8   27.18    2.16
   0   3   8   29.34    2.14
  -1  -3  -8   15.49    1.90
  -1  -3  -8   11.89    1.55
   1   3   8   15.52    1.84
   1   3   8   11.05    1.64
  -2  -3  -8    1.21    0.63
  -2  -3  -8    0.08    0.62
   2   3   8    1.16    0.78
   2   3   8    0.78    0.55
  -3  -3  -8   11.15    1.65
  -3  -3  -8   10.16    1.70
   3   3   8   15.47    2.12
  -4  -3  -8   48.33    3.28
  -4  -3  -8   51.89    3.68
   4   3   8   54.72    3.64
   9  -4  -8    4.86    1.18
  -9   4   8    3.80    1.21
   8  -4  -8    1.13    0.64
  -8   4   8    1.87    0.90
   7  -4  -8    0.89    0.54
  -7   4   8    0.76    0.63
   6  -4  -8   16.80    1.43
   6  -4  -8   18.21    1.76
  -6   4   8   15.20    2.07
  -6   4   8   19.45    1.87
   5  -4  -8    5.54    0.94
   5  -4  -8    6.91    1.00
   5  -4  -8    6.11    0.95
  -5   4   8    5.37    1.11
  -5   4   8    5.86    1.24
   4  -4  -8   -0.15    0.29
   4  -4  -8    0.38    0.36
  -4   4   8    0.59    0.75
  -4   4   8    0.48    0.46
   3  -4  -8   84.10    3.77
   3  -4  -8   81.57    3.70
   2  -4  -8   62.89    3.19
   2  -4  -8   61.12    3.12
  -2   4   8   65.94    3.74
   1  -4  -8    1.02    0.65
   1  -4  -8    0.97    0.48
  -1   4   8   -0.21    0.26
   0  -4  -8   87.88    4.23
   0  -4  -8   94.22    4.41
   0   4   8   90.45    4.40
   0   4   8   92.13    4.39
  -1  -4  -8    0.20    0.40
  -1  -4  -8    0.20    0.62
   1   4   8   -0.22    0.43
  -2  -4  -8    1.44    0.79
  -2  -4  -8    4.60    1.30
   2   4   8    1.35    0.79
  -3  -4  -8   20.01    2.47
  -3  -4  -8   18.95    2.48
   3   4   8   24.74    2.76
   9  -5  -8    3.41    0.96
  -9   5   8    3.77    1.23
   8  -5  -8    3.35    0.90
  -8   5   8    3.76    1.15
   7  -5  -8    1.23    0.52
   7  -5  -8    1.50    0.62
  -7   5   8    2.12    0.85
   6  -5  -8   27.18    1.95
   6  -5  -8   27.61    1.80
  -6   5   8   25.01    2.25
  -6   5   8   24.74    2.25
   5  -5  -8   97.99    4.45
   5  -5  -8  103.74    4.66
  -5   5   8  102.44    5.02
   4  -5  -8    5.55    0.96
   4  -5  -8    9.59    1.38
  -4   5   8    5.33    1.47
   3  -5  -8   40.81    2.40
   3  -5  -8   40.18    2.51
   2  -5  -8   31.42    2.19
   2  -5  -8   25.18    1.92
  -2   5   8   31.41    2.40
   1  -5  -8   29.27    2.11
   1  -5  -8   29.44    2.27
   0  -5  -8    7.22    1.26
   0  -5  -8    6.31    1.21
  -1  -5  -8   26.72    2.23
  -1  -5  -8   27.29    2.31
   1   5   8   30.72    2.45
  -2  -5  -8    4.63    1.40
  -2  -5  -8    4.85    1.23
   2   5   8    7.92    1.62
  -3  -5  -8   14.07    2.20
  -3  -5  -8   11.79    1.84
   3   5   8   14.85    2.30
   9  -6  -8   13.04    1.76
  -9   6   8   12.31    2.27
   8  -6  -8    0.38    0.45
  -8   6   8    0.35    0.62
   7  -6  -8    6.07    1.16
   7  -6  -8    7.23    1.15
  -7   6   8    6.25    1.39
   6  -6  -8  101.24    4.63
  -6   6   8   98.89    5.06
  -6   6   8  101.58    5.36
   5  -6  -8   20.23    2.10
  -5   6   8   21.19    2.46
   4  -6  -8   15.69    1.68
   4  -6  -8   18.08    1.95
   3  -6  -8    5.47    1.13
   3  -6  -8    3.38    0.81
   2  -6  -8   21.48    1.78
   2  -6  -8   23.25    1.98
   1  -6  -8   10.81    1.64
   1  -6  -8   12.09    1.78
   0  -6  -8    0.21    0.73
   0  -6  -8    0.01    0.48
  -1  -6  -8    7.97    1.42
  -1  -6  -8    8.56    1.62
  -2  -6  -8   72.25    4.17
  -2  -6  -8   70.71    4.32
   2   6   8   66.95    4.23
   9  -7  -8   24.35    2.40
  -9   7   8   25.12    3.10
   8  -7  -8   17.67    2.01
   8  -7  -8   22.34    2.36
  -8   7   8   21.06    2.63
   7  -7  -8    0.63    0.59
  -7   7   8    0.28    0.57
   6  -7  -8   23.48    2.38
  -6   7   8   19.93    2.40
   5  -7  -8    2.09    0.77
   4  -7  -8   50.67    2.88
   4  -7  -8   58.15    3.32
   3  -7  -8    0.35    0.53
   3  -7  -8   -0.35    0.32
   2  -7  -8    0.27    0.47
   2  -7  -8    1.22    0.79
   1  -7  -8   62.93    3.56
   1  -7  -8   61.55    3.70
   0  -7  -8   13.97    1.91
   0  -7  -8   18.18    2.37
  -1  -7  -8    8.64    1.60
  -1  -7  -8    6.81    1.52
   8  -8  -8    1.35    0.78
  -8   8   8    2.23    1.01
   7  -8  -8   28.39    2.40
   6  -8  -8   13.93    1.86
   5  -8  -8   32.07    2.52
   4  -8  -8   51.75    3.30
   3  -8  -8    3.77    0.94
   3  -8  -8    2.74    1.05
   2  -8  -8   17.10    2.03
   2  -8  -8   23.65    2.59
   1  -8  -8   26.21    2.79
   1  -8  -8   20.36    2.36
   0  -8  -8    3.63    1.12
   0  -8  -8    4.82    1.43
   7  -9  -8    0.67    0.70
   6  -9  -8    3.41    1.08
   5  -9  -8   11.30    1.85
   4  -9  -8    0.61    0.77
   3  -9  -8   17.12    2.29
   3  -9  -8   10.44    1.63
   2  -9  -8   11.72    1.84
   2  -9  -8   13.04    1.84
   1  -9  -8    1.12    0.98
   1  -9  -8    1.44    0.83
   6 -10  -8   14.56    2.15
   5 -10  -8   16.26    2.23
   4 -10  -8    2.72    1.02
   3 -10  -8    3.07    1.08
   2  10  -9   16.90    2.28
   1  10  -9    9.27    1.65
   0  10  -9   13.37    1.89
   2 -10   9    8.98    1.61
   3 -10   9    1.94    0.95
   4   9  -9   -0.14    0.59
   3   9  -9   17.99    2.33
   2   9  -9    0.94    0.70
   1   9  -9   21.42    2.36
   0   9  -9   57.22    3.34
  -1   9  -9    3.23    1.22
   2  -9   9    1.39    0.75
   3  -9   9    5.17    1.28
   3  -9   9    6.35    1.55
   4  -9   9    7.68    1.48
   4  -9   9    8.42    1.77
   5   8  -9    4.76    1.19
   4   8  -9   41.58    3.01
   3   8  -9   21.01    2.43
   2   8  -9    6.20    1.29
   1   8  -9   25.56    2.50
   0   8  -9    0.87    0.66
  -1   8  -9   15.90    1.86
   1  -8   9   12.23    1.95
   2  -8   9    0.74    0.64
   2  -8   9    1.63    0.86
   3  -8   9    6.60    1.36
   3  -8   9    5.13    1.39
   4  -8   9   17.83    2.20
   4  -8   9   19.09    2.78
   6   7  -9   -0.29    0.55
   5   7  -9    1.72    0.88
   4   7  -9   13.21    1.81
   3   7  -9   60.25    3.43
   2   7  -9   18.02    2.02
   1   7  -9    1.77    0.69
  -1  -7   9    1.39    0.83
   0   7  -9    2.53    0.85
   0  -7   9    2.80    1.00
  -1   7  -9    9.36    1.38
   1  -7   9   13.08    1.99
   2  -7   9    2.81    0.91
   2  -7   9    2.96    1.01
   3  -7   9   30.61    2.34
   3  -7   9   32.90    2.85
   4  -7   9   46.38    3.62
   4  -7   9   45.03    2.97
   5  -7   9    1.58    0.79
   5  -7   9    2.08    1.20
   5  -7   9    1.20    0.78
   6   6  -9   37.66    2.84
   5   6  -9   84.71    4.42
   4   6  -9    2.33    0.77
   3   6  -9   73.64    3.86
  -3  -6   9   78.39    4.73
   2   6  -9    5.11    1.02
  -2  -6   9    4.95    1.23
   1   6  -9   42.50    2.63
  -1  -6   9   46.50    3.10
   0   6  -9   13.54    1.63
   0  -6   9   13.27    1.92
  -1   6  -9   94.74    4.32
   1  -6   9   99.30    5.09
  -2   6  -9   50.18    2.86
   2  -6   9   54.20    3.05
   2  -6   9   55.44    3.62
   3  -6   9   15.00    1.81
   3  -6   9   17.21    2.42
   4  -6   9   11.00    1.58
   4  -6   9   14.04    1.80
   4  -6   9   11.54    2.05
   5  -6   9    2.20    1.09
   5  -6   9    2.83    1.01
   5  -6   9    1.28    0.70
   7   5  -9   12.72    1.88
   7   5  -9   11.07    1.80
   6   5  -9    5.91    1.37
   6   5  -9    4.53    1.13
   5   5  -9    3.58    0.98
   3   5  -9   26.31    1.96
  -3  -5   9   24.43    2.90
   2   5  -9   45.35    2.69
  -2  -5   9   46.74    3.12
   1   5  -9   38.26    2.38
  -1  -5   9   40.64    2.87
   0   5  -9   26.35    1.89
   0  -5   9   25.29    2.26
  -1   5  -9   44.87    2.57
   1  -5   9   44.52    3.15
  -2   5  -9    0.84    0.66
  -2   5  -9    0.36    0.50
   2  -5   9    0.44    0.49
   2  -5   9    1.15    0.78
   3  -5   9   41.43    2.55
   3  -5   9   34.26    2.88
   3  -5   9   35.15    2.34
   4  -5   9    6.29    1.26
   4  -5   9    6.76    1.21
   4  -5   9    6.55    1.60
   5  -5   9    3.47    1.12
   5  -5   9    2.26    1.10
   5  -5   9    3.79    0.98
   7   4  -9   11.91    1.75
   7   4  -9   13.90    1.98
   6   4  -9   11.01    1.61
   6   4  -9    6.51    1.27
  -6  -4   9    8.34    1.79
   5   4  -9   24.97    1.97
   5   4  -9   25.13    1.99
  -5  -4   9   14.83    2.34
   3   4  -9    5.86    1.11
  -3  -4   9    2.57    1.31
   2   4  -9    2.50    0.76
  -2  -4   9    1.89    0.96
   1   4  -9   95.11    4.17
  -1  -4   9   89.00    4.63
   0   4  -9   69.24    3.42
   0  -4   9   73.65    4.06
  -1   4  -9    3.12    1.01
  -1   4  -9    4.13    0.91
   1  -4   9    4.38    1.12
  -2   4  -9    1.39    0.64
  -2   4  -9    1.61    0.75
   2  -4   9    2.60    0.99
   2  -4   9    1.88    0.62
   2  -4   9    1.11    0.56
   3  -4   9    7.77    1.58
   3  -4   9    6.44    1.07
   3  -4   9    6.22    1.18
   4  -4   9   17.46    2.52
   4  -4   9   17.44    2.05
   4  -4   9   15.02    2.34
  -5   4  -9   14.84    2.05
   5  -4   9   12.57    1.93
   5  -4   9   15.93    2.51
   8   3  -9   28.09    2.86
   8   3  -9   27.29    2.77
  -8  -3   9   31.02    2.90
   7   3  -9    9.48    1.50
   7   3  -9   11.66    1.65
  -7  -3   9   11.78    2.01
   6   3  -9    5.61    1.17
   6   3  -9    4.95    1.03
  -6  -3   9    8.61    1.79
   5   3  -9   13.09    1.60
   5   3  -9   14.38    1.73
  -5  -3   9   12.84    2.30
   4   3  -9    3.16    0.81
   4   3  -9    4.04    0.88
  -4  -3   9    4.46    1.52
   3   3  -9    6.07    1.06
  -3  -3   9    1.71    0.98
   2   3  -9  108.74    4.63
   2   3  -9  103.01    4.60
  -2  -3   9  117.15    5.56
   1   3  -9    1.31    0.51
  -1  -3   9    1.71    0.88
   0   3  -9   35.58    2.17
   0  -3   9   31.09    2.53
  -1   3  -9    3.40    0.85
  -1   3  -9    2.46    0.68
  -1   3  -9    1.61    0.67
   1  -3   9    2.70    0.66
   1  -3   9    2.50    0.93
  -2   3  -9    9.58    1.73
  -2   3  -9   10.16    1.37
  -2   3  -9    8.70    1.23
   2  -3   9    9.53    1.73
   2  -3   9    9.95    1.34
   2  -3   9   10.44    1.31
  -3   3  -9    1.04    0.55
  -3   3  -9    0.10    0.45
   3  -3   9    1.07    0.61
   3  -3   9   -0.12    0.38
  -4   3  -9   45.73    2.95
   4  -3   9   39.16    2.80
   4  -3   9   42.37    3.36
  -5   3  -9   19.21    2.32
   5  -3   9   21.04    2.87
   5  -3   9   24.67    2.67
   8   2  -9    8.63    1.55
  -8  -2   9    8.28    1.72
   7   2  -9   12.27    1.65
   7   2  -9   10.41    1.58
  -7  -2   9   13.35    2.09
   6   2  -9    0.10    0.44
   6   2  -9    0.24    0.44
  -6  -2   9    0.31    0.57
   5   2  -9   25.13    1.93
   5   2  -9   25.05    1.87
  -5  -2   9   24.43    2.82
   4   2  -9   39.55    2.40
   4   2  -9   43.32    2.47
   3   2  -9    0.75    0.44
  -3  -2   9    0.09    0.84
   2   2  -9    3.23    0.74
   2   2  -9    3.83    0.86
  -2  -2   9    3.67    1.22
   1   2  -9  124.53    5.08
   1   2  -9  127.97    5.25
  -1  -2   9  121.28    5.69
   0   2  -9   -0.25    0.31
   0   2  -9   -0.22    0.28
   0  -2   9    0.12    0.51
  -1   2  -9   29.36    2.33
  -1   2  -9   28.14    1.93
  -1   2  -9   27.07    1.84
   1  -2   9   24.16    1.75
   1  -2   9   27.59    2.33
  -2   2  -9   64.28    3.24
  -2   2  -9   64.51    3.22
  -2   2  -9   56.27    3.55
   2  -2   9   56.01    3.09
   2  -2   9   62.59    3.84
  -3   2  -9   31.52    2.23
  -3   2  -9   32.06    2.35
   3  -2   9   30.19    2.31
   3  -2   9   37.56    2.92
  -4   2  -9    0.36    0.73
   4  -2   9    0.93    0.75
   4  -2   9    1.28    0.84
  -5   2  -9   14.38    2.05
   5  -2   9   15.14    2.49
   5  -2   9   16.54    2.23
   9   1  -9   12.71    1.87
  -9  -1   9   11.10    2.11
   8   1  -9   14.73    2.00
  -8  -1   9   12.67    2.20
   7   1  -9   -0.47    0.42
   7   1  -9   -0.08    0.38
  -7  -1   9   -0.39    0.45
   6   1  -9    0.05    0.40
   6   1  -9    0.62    0.48
  -6  -1   9   -0.11    0.55
   5   1  -9  195.48    7.13
   5   1  -9  177.17    7.04
  -5  -1   9  192.61    8.27
   4   1  -9    1.60    0.62
   4   1  -9    1.37    0.56
  -4  -1   9    0.49    0.71
   2   1  -9   -0.12    0.28
   2   1  -9    0.00    0.29
  -2  -1   9   -0.43    0.48
   1   1  -9    5.22    0.94
   1   1  -9    7.12    1.15
  -1  -1   9    6.28    1.28
   0   1  -9   28.04    1.77
   0   1  -9   26.90    1.87
   0  -1   9   23.26    1.62
   0  -1   9   26.39    2.26
  -1   1  -9   23.68    1.77
  -1   1  -9   19.47    1.65
   1  -1   9   25.48    2.22
   1  -1   9   19.37    1.61
  -2   1  -9    6.60    1.20
  -2   1  -9    6.93    1.22
  -2   1  -9    5.60    1.28
   2  -1   9    5.48    1.04
   2  -1   9    7.09    1.44
  -3   1  -9   15.08    1.76
  -3   1  -9   16.29    2.02
   3  -1   9   15.02    2.21
   3  -1   9   17.15    2.07
  -4   1  -9   11.23    1.85
  -4   1  -9   11.74    1.74
   4  -1   9   12.54    2.08
   4  -1   9   11.16    1.79
  -5   1  -9    0.33    0.84
   5  -1   9   -0.74    0.70
   5  -1   9    0.73    0.76
   9   0  -9   14.21    1.95
  -9   0   9   19.09    2.66
   8   0  -9   13.99    1.85
  -8   0   9   13.90    2.22
   7   0  -9    9.59    1.48
   7   0  -9    7.12    1.19
  -7   0   9    4.96    1.24
   6   0  -9    0.27    0.48
   6   0  -9   -0.20    0.30
  -6   0   9    0.40    0.67
   5   0  -9    4.94    1.01
   5   0  -9    6.96    1.12
  -5   0   9    4.12    1.23
   4   0  -9    5.68    0.98
   4   0  -9    5.57    0.92
  -4   0   9    6.11    1.59
   3   0  -9   18.27    1.43
   3   0  -9   17.47    1.45
   2   0  -9   62.04    2.95
   2   0  -9   63.99    3.07
  -2   0   9   54.27    3.71
   1   0  -9    7.18    0.98
   1   0  -9    6.53    1.05
   1   0  -9    5.62    1.00
  -1   0   9    8.22    1.10
  -1   0   9    6.63    1.39
   0   0  -9  146.50    5.83
   0   0  -9  147.64    5.74
   0   0   9  151.88    6.51
   0   0   9  141.56    5.65
  -1   0  -9    3.88    0.89
  -1   0  -9    4.13    0.92
   1   0   9    5.85    1.08
   1   0   9    5.43    1.31
  -2   0  -9    0.07    0.40
  -2   0  -9    0.25    0.51
   2   0   9   -0.41    0.37
   2   0   9   -0.08    0.45
  -3   0  -9    8.95    1.53
  -3   0  -9   14.31    1.81
   3   0   9   11.65    1.90
   3   0   9   15.02    1.95
  -4   0  -9    0.32    0.62
  -4   0  -9   -0.60    0.56
   4   0   9    0.16    0.58
   4   0   9    0.96    0.88
   9  -1  -9   49.48    3.22
  -9   1   9   49.04    3.79
   8  -1  -9   64.66    3.64
  -8   1   9   71.51    4.41
   7  -1  -9   17.66    1.92
  -7   1   9   17.56    2.39
   6  -1  -9    5.97    1.08
   6  -1  -9    5.13    0.93
  -6   1   9    6.41    1.44
  -6   1   9    5.46    1.15
   5  -1  -9    7.89    1.15
   5  -1  -9    7.03    1.09
  -5   1   9    8.29    1.59
  -5   1   9    8.23    1.43
   4  -1  -9   10.66    1.28
   4  -1  -9   11.27    1.24
  -4   1   9    9.21    1.83
  -4   1   9   12.15    1.61
   3  -1  -9    6.02    0.98
   3  -1  -9    4.36    0.84
  -3   1   9    1.55    0.91
  -3   1   9    3.25    0.93
   2  -1  -9   33.17    2.10
   2  -1  -9   37.23    1.99
  -2   1   9   30.64    2.73
   1  -1  -9  330.74   11.62
   1  -1  -9  338.43   11.57
   1  -1  -9  336.92   11.34
  -1   1   9  334.35   12.20
  -1   1   9  339.08   11.33
   0  -1  -9  173.72    6.53
   0  -1  -9  166.37    6.57
   0   1   9  163.50    6.44
   0   1   9  168.58    7.12
  -1  -1  -9    2.24    0.82
  -1  -1  -9    0.41    0.47
   1   1   9    1.63    0.82
   1   1   9    1.10    0.70
  -2  -1  -9   13.13    1.80
  -2  -1  -9   11.87    1.67
   2   1   9   12.67    1.90
   2   1   9   11.43    1.66
  -3  -1  -9   -0.08    0.49
  -3  -1  -9    0.56    0.70
   3   1   9    1.36    0.75
   3   1   9    0.50    0.73
  -4  -1  -9    1.68    1.06
  -4  -1  -9    3.69    1.13
   4   1   9    4.48    1.40
   4   1   9    3.45    1.16
   9  -2  -9   11.71    1.79
  -9   2   9    9.52    1.99
   8  -2  -9   14.58    1.91
  -8   2   9   14.70    2.23
   7  -2  -9   10.30    1.47
  -7   2   9    8.56    1.69
   6  -2  -9   34.46    2.19
  -6   2   9   40.75    2.97
  -6   2   9   31.89    2.46
   5  -2  -9    6.96    1.06
   5  -2  -9    7.04    1.04
  -5   2   9    6.73    1.26
  -5   2   9    6.79    1.47
   4  -2  -9   20.72    1.57
   4  -2  -9   20.99    1.45
  -4   2   9   15.35    2.38
   3  -2  -9  186.75    6.67
   3  -2  -9  180.83    6.88
   2  -2  -9   16.44    1.60
   2  -2  -9   17.60    1.47
  -2   2   9   17.20    2.28
   1  -2  -9   20.57    1.69
   1  -2  -9   23.28    1.72
  -1   2   9   18.55    1.59
  -1   2   9   20.04    1.97
   0  -2  -9    1.21    0.60
   0  -2  -9    2.03    0.78
   0   2   9    2.89    0.98
   0   2   9    1.64    0.78
  -1  -2  -9    0.48    0.55
  -1  -2  -9    0.12    0.54
   1   2   9    0.48    0.57
   1   2   9    0.25    0.53
  -2  -2  -9   -0.15    0.47
  -2  -2  -9    0.64    0.73
   2   2   9   -0.35    0.56
   2   2   9    0.04    0.45
  -3  -2  -9    2.11    1.15
  -3  -2  -9    3.25    1.02
   3   2   9    2.19    1.13
   3   2   9    3.26    1.06
  -4  -2  -9   14.62    2.29
  -4  -2  -9   18.53    2.33
   4   2   9   17.20    2.42
   9  -3  -9    3.31    1.04
  -9   3   9    2.67    1.18
   8  -3  -9    9.95    1.56
  -8   3   9    8.76    1.76
   7  -3  -9    1.30    0.58
  -7   3   9    1.31    0.82
   6  -3  -9    1.75    0.62
  -6   3   9    1.80    0.72
  -6   3   9    1.48    0.77
   5  -3  -9  101.95    4.14
   5  -3  -9  102.10    4.27
  -5   3   9   91.39    4.76
  -5   3   9  100.25    5.26
   4  -3  -9  236.10    8.45
   4  -3  -9  239.16    8.35
  -4   3   9  230.53    9.15
   3  -3  -9   66.40    3.16
   3  -3  -9   60.89    3.13
   2  -3  -9   13.05    1.57
   2  -3  -9   14.17    1.68
  -2   3   9   16.17    2.15
   1  -3  -9    0.60    0.48
   1  -3  -9    3.09    0.86
  -1   3   9    0.54    0.62
   0  -3  -9    4.99    1.11
   0  -3  -9    3.65    0.91
   0   3   9    4.63    1.15
   0   3   9    4.01    0.98
  -1  -3  -9   13.68    1.81
  -1  -3  -9   15.00    1.92
   1   3   9   20.97    2.29
   1   3   9   18.85    2.21
  -2  -3  -9    5.06    1.31
  -2  -3  -9    2.83    0.96
   2   3   9    2.35    0.95
  -3  -3  -9    1.89    1.10
  -3  -3  -9    3.33    1.10
   3   3   9    4.44    1.33
   9  -4  -9    6.28    1.36
  -9   4   9    3.84    1.31
   8  -4  -9    8.35    1.43
  -8   4   9    7.92    1.73
   7  -4  -9    2.58    0.75
  -7   4   9    5.07    1.34
   6  -4  -9   10.96    1.34
  -6   4   9   10.06    1.67
  -6   4   9   10.02    1.73
   5  -4  -9   14.01    1.54
   5  -4  -9   13.73    1.51
  -5   4   9   10.17    1.88
  -5   4   9    6.62    1.33
   4  -4  -9    6.97    1.16
   4  -4  -9    5.31    0.96
  -4   4   9    3.47    1.22
   3  -4  -9   58.54    3.07
   3  -4  -9   56.27    3.01
   2  -4  -9   35.39    2.40
   2  -4  -9   35.76    2.37
  -2   4   9   40.48    2.85
   1  -4  -9   10.84    1.49
   1  -4  -9   12.34    1.64
  -1   4   9    8.52    1.50
   0  -4  -9    6.59    1.30
   0  -4  -9    7.30    1.34
   0   4   9    8.89    1.54
  -1  -4  -9   26.42    2.68
  -1  -4  -9   28.44    2.41
   1   4   9   25.76    2.26
  -2  -4  -9    3.42    1.16
  -2  -4  -9    1.25    0.95
   2   4   9    2.21    1.07
  -3  -4  -9    2.02    0.91
  -3  -4  -9    2.00    1.14
   3   4   9    3.34    1.24
   9  -5  -9   35.42    2.69
  -9   5   9   34.34    3.17
   8  -5  -9    5.58    1.16
  -8   5   9    5.81    1.42
   7  -5  -9    2.06    0.67
  -7   5   9    5.04    1.32
   6  -5  -9    0.91    0.53
  -6   5   9    0.72    0.60
  -6   5   9    1.43    0.78
   5  -5  -9    5.99    1.04
   5  -5  -9   19.58    1.89
  -5   5   9   12.23    2.04
   4  -5  -9    1.30    0.57
   4  -5  -9    0.59    0.50
  -4   5   9    0.05    0.66
   3  -5  -9    1.95    0.72
   3  -5  -9    0.76    0.53
  -3   5   9    1.08    0.90
   2  -5  -9    1.25    0.73
   2  -5  -9    1.58    0.63
   1  -5  -9   48.68    2.99
   1  -5  -9   51.12    3.09
   0  -5  -9  121.72    5.63
   0  -5  -9  129.07    5.80
  -1  -5  -9   -0.46    0.43
  -1  -5  -9   -0.24    0.62
   1   5   9    0.44    0.86
  -2  -5  -9    6.36    1.42
  -2  -5  -9    6.83    1.63
   2   5   9    8.72    1.80
   9  -6  -9   72.46    3.93
  -9   6   9   70.56    4.76
   8  -6  -9   19.35    2.07
  -8   6   9   19.33    2.71
   7  -6  -9    1.86    0.92
  -7   6   9    3.11    1.18
   6  -6  -9    4.79    1.07
  -6   6   9    4.24    1.33
   5  -6  -9   22.77    1.90
  -5   6   9   16.47    2.53
   4  -6  -9   29.25    2.11
   4  -6  -9   30.28    2.28
   3  -6  -9   -0.29    0.42
   3  -6  -9    0.59    0.59
   2  -6  -9   74.89    3.88
   2  -6  -9   73.28    3.96
   1  -6  -9   25.47    2.59
   1  -6  -9   28.52    2.83
   0  -6  -9    1.75    1.06
   0  -6  -9    0.89    0.74
  -1  -6  -9    0.38    0.71
  -1  -6  -9    0.95    0.92
  -8   7   9    1.79    1.00
   7  -7  -9   10.22    1.60
  -7   7   9   10.47    1.92
   6  -7  -9    3.85    1.03
  -6   7   9    6.07    1.59
   5  -7  -9   29.72    2.34
   4  -7  -9   61.69    3.36
   4  -7  -9   64.87    3.68
   3  -7  -9   71.74    3.84
   3  -7  -9   80.17    4.21
   2  -7  -9    0.91    0.63
   2  -7  -9    1.88    0.96
   1  -7  -9   -0.35    0.44
   1  -7  -9    0.39    0.88
   0  -7  -9    7.01    1.65
   0  -7  -9    6.77    1.52
   8  -8  -9   18.36    2.27
  -8   8   9   18.78    2.79
   7  -8  -9   12.35    1.91
   6  -8  -9   22.77    2.44
   5  -8  -9   79.38    4.34
   4  -8  -9   60.57    3.73
   3  -8  -9    1.68    0.84
   3  -8  -9    0.76    0.63
   2  -8  -9    5.18    1.36
   2  -8  -9    6.48    1.35
   1  -8  -9   10.26    1.82
   1  -8  -9   10.78    1.79
   7  -9  -9    2.24    0.99
   6  -9  -9   17.58    2.29
   5  -9  -9    8.89    1.67
   4  -9  -9   38.41    3.02
   3  -9  -9    0.19    0.56
   3  -9  -9    0.15    0.70
   1  10 -10   22.42    2.55
   0  10 -10    1.07    0.78
   3   9 -10   31.04    2.62
   2   9 -10   16.83    2.19
   1   9 -10    5.38    1.29
   0   9 -10    7.18    1.40
   2  -9  10   16.22    2.15
   4   8 -10    6.27    1.41
   3   8 -10   14.15    1.96
   2   8 -10    4.22    1.07
   1   8 -10   28.31    2.32
   0   8 -10   10.34    1.56
  -1   8 -10   47.55    2.96
   1  -8  10   48.33    3.53
   2  -8  10   12.36    2.08
   2  -8  10   11.27    1.72
   3  -8  10   -0.67    0.48
   3  -8  10   -0.09    0.73
   5   7 -10    8.02    1.61
   4   7 -10   57.38    3.53
   3   7 -10   17.33    2.04
   2   7 -10    0.29    0.59
   1   7 -10   18.25    2.04
  -1  -7  10   16.97    2.25
   0   7 -10   11.96    1.67
   0  -7  10   13.71    2.14
  -1   7 -10   13.58    1.82
   1  -7  10   11.34    1.93
   2  -7  10    1.24    0.79
   2  -7  10    1.15    0.71
   3  -7  10    9.77    1.59
   3  -7  10    6.76    1.61
   4  -7  10    6.20    1.36
   4  -7  10    5.11    1.56
   6   6 -10    0.70    0.79
   5   6 -10    6.55    1.30
   4   6 -10   -0.08    0.45
   3   6 -10    5.75    1.19
  -3  -6  10    6.33    1.51
   2   6 -10  110.70    5.12
  -2  -6  10  120.58    5.77
   1   6 -10   10.79    1.58
  -1  -6  10    6.95    1.45
   0   6 -10    0.72    0.61
   0  -6  10    0.02    0.65
  -1   6 -10    4.61    1.03
   1  -6  10    6.09    1.51
  -2   6 -10    8.46    1.46
   2  -6  10    8.01    1.39
   2  -6  10    9.18    1.78
   3  -6  10    1.53    0.73
   3  -6  10    1.33    0.91
   4  -6  10    0.10    0.64
   4  -6  10    0.69    0.64
   7   5 -10    3.81    1.25
   7   5 -10    3.05    1.10
   6   5 -10    0.66    0.62
   5   5 -10   -0.06    0.41
  -5  -5  10    0.41    0.86
  -4  -5  10   15.34    2.37
   3   5 -10   35.29    2.48
  -3  -5  10   41.59    3.21
   2   5 -10   53.21    3.10
  -2  -5  10   60.13    3.73
   1   5 -10   -0.34    0.42
  -1  -5  10   -0.40    0.55
   0   5 -10   36.99    2.44
   0  -5  10   38.81    2.98
  -1   5 -10    0.84    0.55
   1  -5  10    1.00    0.77
  -2   5 -10   12.12    1.65
   2  -5  10   10.60    1.97
   2  -5  10   13.21    1.67
   3  -5  10    1.53    0.69
   3  -5  10    0.55    0.67
   4  -5  10    9.21    1.47
   4  -5  10    6.67    1.35
   4  -5  10    8.17    1.81
   7   4 -10    0.75    0.63
   7   4 -10    1.21    0.75
  -7  -4  10    0.36    0.88
   6   4 -10    3.16    0.96
   6   4 -10    1.22    0.82
  -6  -4  10    0.75    0.88
   5   4 -10   29.68    2.29
   4   4 -10    2.00    0.75
  -4  -4  10    0.19    0.83
   3   4 -10  164.24    6.50
  -3  -4  10  155.52    7.45
   2   4 -10   10.70    1.48
  -2  -4  10   12.57    2.04
   1   4 -10    3.84    0.91
  -1  -4  10    6.37    1.44
   0   4 -10    1.59    0.73
   0  -4  10    2.12    0.94
  -1   4 -10    2.40    0.75
   1  -4  10    3.33    1.12
  -2   4 -10   26.61    2.06
   2  -4  10   31.25    2.76
   2  -4  10   29.09    2.05
  -3   4 -10    0.99    0.66
   3  -4  10    0.31    0.56
   3  -4  10    0.13    0.56
  -4   4 -10   -0.05    0.58
   4  -4  10   -0.24    0.50
   4  -4  10   -0.09    0.63
   8   3 -10    0.44    0.63
   8   3 -10    0.29    0.63
  -8  -3  10    0.96    1.01
   7   3 -10    9.71    1.52
   7   3 -10   12.17    1.69
  -7  -3  10   12.32    2.35
   6   3 -10   36.84    2.57
   6   3 -10   42.52    2.73
  -6  -3  10   37.43    3.45
   5   3 -10   64.97    3.46
   5   3 -10   63.15    3.43
   4   3 -10   33.47    2.29
   3   3 -10   -0.03    0.40
  -3  -3  10   -0.01    0.84
   2   3 -10    3.65    0.89
  -2  -3  10    3.79    1.19
   1   3 -10   -0.08    0.39
  -1  -3  10   -0.38    0.58
   0   3 -10    4.22    0.95
   0  -3  10    3.34    1.05
  -1   3 -10   -0.20    0.43
  -1   3 -10   -0.21    0.38
   1  -3  10    0.01    0.53
  -2   3 -10    1.10    0.69
  -2   3 -10    1.85    0.76
   2  -3  10    1.22    0.76
   2  -3  10    1.19    0.68
  -3   3 -10    3.26    0.94
  -3   3 -10    6.05    1.27
   3  -3  10    4.89    1.13
   3  -3  10    7.01    1.62
  -4   3 -10   12.62    1.93
   4  -3  10   10.22    2.06
   4  -3  10   10.38    1.67
   8   2 -10    6.94    1.40
  -8  -2  10   10.34    2.00
   7   2 -10   16.56    1.94
   7   2 -10   15.69    1.96
  -7  -2  10   16.26    2.48
   6   2 -10   46.24    2.84
   6   2 -10   43.59    2.72
  -6  -2  10   43.50    3.59
   5   2 -10   28.97    2.05
   5   2 -10   24.14    1.92
  -5  -2  10   17.51    2.61
   4   2 -10    1.83    0.66
   4   2 -10    1.54    0.81
  -4  -2  10    0.28    0.98
   3   2 -10    0.20    0.43
  -3  -2  10    1.14    1.11
   2   2 -10   28.95    2.05
  -2  -2  10   31.84    2.79
   1   2 -10    3.25    0.85
  -1  -2  10    3.97    1.20
   0   2 -10   -0.10    0.44
   0  -2  10   -0.03    0.59
  -1   2 -10    6.21    1.33
  -1   2 -10    7.89    1.21
  -1   2 -10    6.88    1.21
   1  -2  10    8.44    1.64
   1  -2  10    8.55    1.26
  -2   2 -10   15.64    1.86
  -2   2 -10   12.06    1.60
   2  -2  10   13.66    2.08
   2  -2  10   15.58    1.78
  -3   2 -10    4.04    1.02
  -3   2 -10    4.51    1.16
   3  -2  10    4.48    1.32
   3  -2  10    5.59    1.25
  -4   2 -10    1.97    0.91
   4  -2  10    2.91    1.09
   4  -2  10    3.24    1.27
   8   1 -10   17.88    2.21
  -8  -1  10   20.63    2.86
   7   1 -10    0.14    0.51
   7   1 -10    1.33    0.67
  -7  -1  10    0.44    0.68
   6   1 -10   -0.42    0.38
   6   1 -10    0.35    0.44
  -6  -1  10   -0.56    0.46
   5   1 -10    0.84    0.54
   5   1 -10    1.47    0.67
  -5  -1  10    1.75    1.17
   4   1 -10   18.63    1.93
   4   1 -10   15.63    1.75
   3   1 -10   32.45    2.05
  -3  -1  10   18.18    2.70
   2   1 -10    2.60    0.71
  -2  -1  10    4.67    1.35
   1   1 -10   80.84    3.79
  -1  -1  10   75.36    4.31
   0   1 -10    1.42    0.67
   0   1 -10    3.66    0.96
   0  -1  10    2.21    0.98
   0  -1  10    2.67    0.80
  -1   1 -10    0.98    0.59
  -1   1 -10   -0.51    0.48
  -1   1 -10    0.50    0.54
   1  -1  10    0.67    0.65
   1  -1  10    0.47    0.50
  -2   1 -10    5.94    1.16
  -2   1 -10    8.93    1.46
   2  -1  10    4.72    1.31
   2  -1  10    8.55    1.39
  -3   1 -10    3.17    1.01
  -3   1 -10    3.62    1.00
   3  -1  10    3.44    1.19
   3  -1  10    3.40    1.09
  -4   1 -10    7.30    1.60
   4  -1  10    7.89    1.85
   4  -1  10    7.61    1.61
   9   0 -10   11.15    1.82
  -9   0  10    9.89    2.07
   8   0 -10   29.88    2.44
  -8   0  10   37.10    3.21
   7   0 -10    2.45    0.81
   7   0 -10    2.34    0.81
  -7   0  10    1.84    0.98
   6   0 -10    2.85    0.77
   6   0 -10    1.91    0.71
  -6   0  10    3.07    1.12
   5   0 -10    0.71    0.51
   5   0 -10    0.69    0.53
  -5   0  10    0.32    0.82
   4   0 -10  165.81    6.42
   4   0 -10  160.65    6.20
   3   0 -10   44.91    2.61
   2   0 -10    0.09    0.40
  -2   0  10   -0.95    0.65
   1   0 -10    5.22    0.97
  -1   0  10    5.96    1.42
   0   0 -10    1.45    0.62
   0   0 -10    1.88    0.78
   0   0  10    1.68    0.84
   0   0  10    1.05    0.62
  -1   0 -10    5.69    1.17
  -1   0 -10    5.29    1.11
   1   0  10    5.32    1.11
   1   0  10    4.05    1.21
  -2   0 -10    3.67    0.97
  -2   0 -10    4.29    1.22
   2   0  10    3.33    1.15
   2   0  10    2.14    0.85
  -3   0 -10    4.86    1.20
  -3   0 -10    5.61    1.39
   3   0  10    6.29    1.51
   3   0  10    5.79    1.33
  -4   0 -10   12.92    1.92
  -4   0 -10   17.06    2.41
   4   0  10   13.42    2.00
   4   0  10   14.14    2.35
   9  -1 -10   21.59    2.39
  -9   1  10   28.10    3.38
   8  -1 -10    2.10    0.92
  -8   1  10    1.80    0.89
   7  -1 -10    5.05    1.09
  -7   1  10    5.29    1.43
   6  -1 -10   40.08    2.47
   6  -1 -10   42.38    2.47
  -6   1  10   37.99    3.17
   5  -1 -10   21.31    1.69
   5  -1 -10   28.34    1.92
  -5   1  10   22.89    2.03
  -5   1  10   16.17    2.49
   4  -1 -10   66.36    3.22
   4  -1 -10   57.93    2.89
  -4   1  10   56.39    3.45
   3  -1 -10    0.37    0.42
  -3   1  10    0.98    1.09
   2  -1 -10   44.98    2.67
  -2   1  10   48.92    3.43
   1  -1 -10    2.47    0.72
   1  -1 -10    3.75    0.92
  -1   1  10    2.55    0.77
  -1   1  10    3.13    1.06
   0  -1 -10    6.85    1.17
   0  -1 -10    4.95    1.03
   0   1  10    5.40    1.32
   0   1  10    6.64    1.20
  -1  -1 -10    1.69    0.81
  -1  -1 -10    2.25    0.88
   1   1  10    2.44    0.98
   1   1  10    2.59    0.95
  -2  -1 -10    5.19    1.24
  -2  -1 -10    2.65    1.11
   2   1  10    3.09    1.04
   2   1  10    3.91    1.19
  -3  -1 -10   33.09    2.58
  -3  -1 -10   34.65    2.87
   3   1  10   30.33    2.84
   3   1  10   29.41    2.94
   9  -2 -10    1.03    0.68
  -9   2  10    1.42    0.93
   8  -2 -10   -0.17    0.49
  -8   2  10    0.53    0.65
   7  -2 -10   79.47    3.93
  -7   2  10   78.34    4.74
   6  -2 -10   62.48    3.19
   6  -2 -10   65.37    3.25
  -6   2  10   58.78    4.05
   5  -2 -10   40.26    2.41
   5  -2 -10   40.39    2.27
  -5   2  10   32.43    3.12
  -5   2  10   39.45    2.84
   4  -2 -10    0.96    0.58
  -4   2  10    0.80    0.86
   3  -2 -10    7.95    1.21
  -3   2  10    5.07    1.42
   2  -2 -10    0.74    0.53
   2  -2 -10    0.63    0.42
  -2   2  10    1.15    0.89
   1  -2 -10   45.47    2.74
   1  -2 -10   45.01    2.63
  -1   2  10   42.26    2.62
  -1   2  10   44.30    3.11
   0  -2 -10    6.78    1.28
   0  -2 -10    8.40    1.43
   0   2  10    5.69    1.20
   0   2  10    5.70    1.33
  -1  -2 -10   68.01    3.85
  -1  -2 -10   69.42    3.79
   1   2  10   67.33    3.73
  -2  -2 -10   -1.17    0.62
  -2  -2 -10    0.24    0.70
   2   2  10    0.51    0.60
   2   2  10    1.43    1.00
  -3  -2 -10    1.94    1.02
  -3  -2 -10    1.65    0.85
   3   2  10    1.26    1.06
   3   2  10    0.85    0.73
   9  -3 -10   11.15    1.85
  -9   3  10   10.66    2.12
   8  -3 -10   22.73    2.37
  -8   3  10   15.14    2.40
   7  -3 -10   50.02    2.85
  -7   3  10   42.11    3.37
   6  -3 -10   10.88    1.44
   6  -3 -10   12.18    1.42
  -6   3  10   13.08    2.14
   5  -3 -10    1.50    0.57
  -5   3  10    2.23    1.19
  -5   3  10    1.12    0.65
   3  -3 -10    7.26    1.16
   3  -3 -10    4.64    0.96
  -3   3  10    3.05    1.32
   2  -3 -10   42.87    2.67
   2  -3 -10   44.54    2.65
  -2   3  10   45.69    3.20
   1  -3 -10    0.25    0.56
   1  -3 -10    0.30    0.54
  -1   3  10    0.06    0.58
   0  -3 -10    9.64    1.51
   0  -3 -10   12.28    1.78
   0   3  10   11.90    1.87
   0   3  10   10.74    1.63
  -1  -3 -10    1.47    0.90
  -1  -3 -10    0.76    0.66
   1   3  10    2.03    0.97
   1   3  10    3.99    1.14
  -2  -3 -10   17.86    2.28
  -2  -3 -10   18.17    2.50
   2   3  10   16.34    2.17
   9  -4 -10   32.18    3.05
  -9   4  10   28.80    3.49
   8  -4 -10   20.31    2.27
  -8   4  10   17.33    2.58
   7  -4 -10   26.89    1.96
  -7   4  10   19.22    2.59
  -6   4  10   11.37    2.02
   5  -4 -10    1.03    0.54
  -5   4  10    0.38    0.78
   4  -4 -10    7.26    1.18
   4  -4 -10    6.07    1.10
   3  -4 -10    6.43    1.20
   3  -4 -10    7.34    1.27
  -3   4  10    8.11    1.81
   2  -4 -10    2.54    0.81
   2  -4 -10    1.03    0.68
  -2   4  10    2.16    0.91
   1  -4 -10    4.02    1.05
   1  -4 -10    3.71    1.07
  -1   4  10    3.74    1.15
   0  -4 -10    0.16    0.53
   0  -4 -10   -0.98    0.56
  -1  -4 -10    8.49    1.56
  -1  -4 -10    7.88    1.73
   1   4  10   10.00    1.72
  -2  -4 -10    0.35    0.95
  -2  -4 -10    0.08    0.67
   2   4  10    1.39    0.93
   9  -5 -10   13.66    1.88
  -9   5  10    9.55    2.09
   8  -5 -10    0.80    0.63
  -8   5  10    2.07    1.12
  -7   5  10   12.01    2.06
  -6   5  10    8.44    1.88
   5  -5 -10   21.04    2.09
   5  -5 -10   19.22    1.98
   4  -5 -10   -0.46    0.41
   4  -5 -10    0.11    0.37
  -4   5  10   -0.25    0.81
   3  -5 -10   23.65    2.00
   3  -5 -10   19.36    2.09
  -3   5  10   26.12    2.95
   2  -5 -10    1.54    0.75
   2  -5 -10    1.97    0.87
   1  -5 -10   -0.79    0.57
   1  -5 -10    0.01    0.48
   0  -5 -10   11.69    1.75
   0  -5 -10   13.43    2.02
  -1  -5 -10    0.10    0.82
  -1  -5 -10   -0.06    0.55
  -8   6  10    1.54    0.98
  -7   6  10   24.85    3.09
   6  -6 -10    4.29    1.04
  -6   6  10    4.20    1.56
   5  -6 -10    6.15    1.22
  -5   6  10    1.91    1.17
   4  -6 -10    0.63    0.52
   4  -6 -10    0.87    0.68
   3  -6 -10   10.89    1.72
   3  -6 -10    9.04    1.48
   2  -6 -10   43.72    2.94
   2  -6 -10   47.14    3.11
   1  -6 -10   12.21    1.81
   1  -6 -10   11.28    1.89
   0  -6 -10   36.24    2.99
   0  -6 -10   42.34    3.04
  -8   7  10    6.65    1.74
  -7   7  10   23.22    3.14
   6  -7 -10   68.41    3.92
   5  -7 -10   16.67    2.14
   4  -7 -10    0.14    0.52
   4  -7 -10    0.77    0.68
   3  -7 -10    0.29    0.69
   3  -7 -10    0.36    0.59
   2  -7 -10   14.22    2.19
   2  -7 -10   16.25    2.03
   1  -7 -10    7.87    1.69
   1  -7 -10    6.03    1.37
   7  -8 -10    2.73    1.04
   6  -8 -10   10.78    1.79
   5  -8 -10    8.94    1.67
   4  -8 -10    1.55    0.82
   4  -8 -10    1.01    0.77
   3  -8 -10    3.31    1.03
   3  -8 -10    2.33    0.94
   2  -8 -10    6.78    1.67
   2  -8 -10    7.24    1.49
   1   9 -11    2.87    1.01
   0   9 -11   13.34    1.94
   3   8 -11   12.02    1.81
   2   8 -11   19.60    2.39
   1   8 -11    1.15    0.77
   0   8 -11    3.69    1.08
   0  -8  11    5.48    1.85
  -1   8 -11   19.26    2.52
   1  -8  11   18.13    2.63
   2  -8  11    1.41    0.89
   2  -8  11    3.42    1.26
   4   7 -11   34.72    2.71
   3   7 -11    3.53    1.11
   2   7 -11   23.25    2.50
   1   7 -11   13.81    1.88
  -1  -7  11   11.19    1.90
   0   7 -11  119.64    5.47
   0  -7  11  116.00    6.13
  -1   7 -11    0.05    0.56
   1  -7  11   -0.09    0.55
   2  -7  11   11.14    1.73
   2  -7  11   13.17    2.31
   3  -7  11   18.51    2.20
   3  -7  11   21.29    3.04
   5   6 -11   17.17    2.25
   4   6 -11    5.36    1.25
   3   6 -11   84.08    4.39
  -3  -6  11   85.37    4.93
   2   6 -11    5.23    1.18
  -2  -6  11    5.60    1.51
   1   6 -11    0.28    0.50
  -1  -6  11    0.16    0.70
   0   6 -11    7.25    1.36
   0  -6  11    4.37    1.23
  -1   6 -11    1.96    0.83
   1  -6  11    0.85    0.83
   2  -6  11    3.12    1.18
   2  -6  11    4.58    1.13
   3  -6  11    0.65    0.66
   3  -6  11    0.05    0.48
   6   5 -11    9.88    1.68
   5   5 -11   17.13    2.08
  -5  -5  11    7.14    1.94
   4   5 -11   41.36    2.82
  -4  -5  11   41.01    3.56
   3   5 -11   -0.58    0.46
  -3  -5  11    0.06    0.95
   2   5 -11    4.05    1.05
  -2  -5  11    1.04    0.93
   1   5 -11   10.66    1.56
  -1  -5  11   10.93    1.91
   0   5 -11   30.92    2.35
   0  -5  11   32.13    2.87
  -1   5 -11   19.94    2.11
   1  -5  11   16.39    2.43
  -2   5 -11    1.58    0.78
   2  -5  11    2.04    0.81
   2  -5  11    1.02    0.77
   3  -5  11   18.24    2.15
   3  -5  11   13.75    2.32
   7   4 -11   15.74    2.15
   7   4 -11   14.68    2.02
  -7  -4  11    8.27    2.25
   6   4 -11    3.61    1.16
   6   4 -11    3.80    1.08
  -6  -4  11    0.39    1.00
   5   4 -11    1.17    0.67
  -5  -4  11    0.60    1.02
   4   4 -11    3.08    0.88
  -4  -4  11    1.56    1.17
   3   4 -11   45.79    2.85
  -3  -4  11   44.67    3.50
   2   4 -11    6.84    1.28
  -2  -4  11    7.14    1.65
   1   4 -11   61.63    3.42
  -1  -4  11   61.78    3.97
   0   4 -11    8.72    1.39
   0  -4  11    7.89    1.64
  -1   4 -11   28.00    2.20
   1  -4  11   28.83    2.76
  -2   4 -11    9.77    1.53
   2  -4  11    9.41    1.84
   3  -4  11    0.24    0.64
   7   3 -11    0.37    0.63
   7   3 -11    0.91    0.83
  -7  -3  11   -0.94    0.82
   6   3 -11   21.53    2.29
   6   3 -11   18.06    2.07
  -6  -3  11    9.41    2.17
   5   3 -11    2.23    0.80
  -5  -3  11    0.30    0.93
   4   3 -11   11.47    1.66
  -4  -3  11    4.32    1.50
   3   3 -11    1.29    0.66
  -3  -3  11    0.87    0.95
   2   3 -11    0.25    0.46
  -2  -3  11    0.14    0.71
   1   3 -11   20.15    2.05
  -1  -3  11   15.51    2.32
   0   3 -11   49.10    3.00
   0  -3  11   51.76    3.64
  -1   3 -11   12.49    1.74
   1  -3  11   10.14    1.87
  -2   3 -11   -0.45    0.52
   2  -3  11   -0.43    0.50
  -3   3 -11    9.53    1.60
   3  -3  11    6.43    1.59
   3  -3  11    7.10    1.41
   8   2 -11   34.01    2.78
  -8  -2  11   48.19    4.12
   7   2 -11    9.87    1.66
   7   2 -11   10.70    1.67
  -7  -2  11    9.24    2.18
   6   2 -11   33.24    2.46
   6   2 -11   35.83    2.49
   5   2 -11    0.74    0.53
   5   2 -11    1.46    0.74
  -5  -2  11    0.49    0.92
  -4  -2  11   47.12    3.86
   3   2 -11    7.40    1.25
  -3  -2  11    9.05    1.98
   2   2 -11    2.19    0.71
  -2  -2  11    2.33    1.12
   1   2 -11   48.46    2.94
  -1  -2  11   52.60    3.61
   0   2 -11    2.15    0.82
   0  -2  11    1.47    0.86
  -1   2 -11    1.57    0.71
   1  -2  11    1.60    0.87
  -2   2 -11   -0.31    0.51
  -2   2 -11   -0.41    0.45
   2  -2  11    0.48    0.63
   2  -2  11   -0.02    0.58
  -3   2 -11    2.04    0.79
  -3   2 -11    1.96    0.98
   3  -2  11    2.23    1.03
   3  -2  11    2.98    1.13
   8   1 -11   12.30    1.98
  -8  -1  11   10.88    2.25
   7   1 -11    9.31    1.50
   7   1 -11   11.44    1.73
  -7  -1  11   11.75    2.32
   6   1 -11    0.45    0.56
   6   1 -11    1.09    0.65
  -6  -1  11    0.83    0.98
   5   1 -11    4.90    1.04
   5   1 -11    5.99    1.18
  -5  -1  11    2.79    1.23
   4   1 -11   11.09    1.52
   3   1 -11   14.68    1.75
  -3  -1  11   14.63    2.40
   2   1 -11   77.43    3.93
  -2  -1  11   82.30    4.72
   1   1 -11   35.01    2.43
  -1  -1  11   36.82    3.00
   0   1 -11    2.58    0.90
   0  -1  11    1.61    0.86
  -1   1 -11   14.15    1.83
  -1   1 -11   12.34    1.78
   1  -1  11   11.37    1.58
   1  -1  11   11.22    1.98
  -2   1 -11   -0.26    0.64
  -2   1 -11    0.03    0.59
   2  -1  11    0.60    0.67
   2  -1  11   -0.40    0.57
  -3   1 -11    8.07    1.50
  -3   1 -11    4.93    1.32
   3  -1  11    7.98    1.62
   3  -1  11    6.21    1.59
   8   0 -11   15.90    1.98
  -8   0  11   18.85    2.76
   7   0 -11    7.58    1.36
   7   0 -11    8.13    1.43
  -7   0  11    7.10    1.87
   6   0 -11   16.93    1.93
   6   0 -11   15.77    1.81
  -6   0  11    8.90    2.05
   5   0 -11   15.61    1.72
   5   0 -11   16.87    1.86
  -5   0  11    9.69    2.12
   4   0 -11    7.31    1.17
  -4   0  11    1.55    1.08
   3   0 -11    6.29    1.16
  -3   0  11    6.61    1.78
   2   0 -11   20.63    2.14
  -2   0  11   14.75    2.28
   1   0 -11    9.75    1.46
  -1   0  11   13.94    2.14
   0   0 -11  159.86    6.58
   0   0 -11  164.17    6.41
   0   0  11  156.65    7.24
   0   0  11  142.39    6.36
  -1   0 -11   36.59    2.66
  -1   0 -11   36.28    2.61
   1   0  11   38.11    3.15
   1   0  11   38.12    2.61
  -2   0 -11    1.41    0.72
  -2   0 -11    0.93    0.88
   2   0  11    1.39    0.86
   2   0  11    1.15    0.81
  -3   0 -11    4.95    1.27
  -3   0 -11    7.02    1.72
   3   0  11    4.79    1.31
   3   0  11    6.09    1.61
   8  -1 -11    7.58    1.38
  -8   1  11    8.91    1.99
   7  -1 -11   10.41    1.54
  -7   1  11    9.96    1.99
   6  -1 -11   10.05    1.41
   6  -1 -11   10.54    1.53
  -6   1  11    8.29    2.01
   5  -1 -11   11.00    1.41
   5  -1 -11    7.42    1.21
  -5   1  11    2.91    1.28
   4  -1 -11   11.23    1.60
   4  -1 -11   14.28    2.18
   3  -1 -11    7.08    1.26
  -3   1  11    6.94    1.78
   2  -1 -11   45.96    2.86
  -2   1  11   49.67    3.52
   1  -1 -11   14.25    1.82
  -1   1  11   13.85    2.07
   0  -1 -11   26.08    2.62
   0  -1 -11   28.58    2.21
   0   1  11   27.98    2.62
   0   1  11   25.31    2.07
  -1  -1 -11    0.56    0.67
  -1  -1 -11    1.24    0.74
   1   1  11    2.02    0.88
   1   1  11    0.56    0.71
  -2  -1 -11   24.38    2.58
  -2  -1 -11   16.42    2.15
   2   1  11   18.21    2.56
   2   1  11   24.23    2.60
   8  -2 -11    1.01    0.67
  -8   2  11   -0.33    0.72
   7  -2 -11   15.66    1.84
  -7   2  11   13.79    2.45
   6  -2 -11   63.60    3.26
   6  -2 -11   64.91    3.37
  -6   2  11   53.76    4.35
   5  -2 -11   18.50    1.93
  -5   2  11    8.29    1.97
  -4   2  11   13.16    2.43
   3  -2 -11   92.66    4.41
  -3   2  11   92.75    5.42
   2  -2 -11   42.54    2.76
  -2   2  11   43.60    3.29
   1  -2 -11   10.98    1.57
   1  -2 -11   10.22    1.61
  -1   2  11   11.95    2.02
   0  -2 -11   24.32    2.44
   0  -2 -11   27.71    2.27
   0   2  11   22.25    2.32
   0   2  11   26.75    2.53
  -1  -2 -11    8.01    1.51
  -1  -2 -11   12.72    1.97
   1   2  11   11.21    1.92
   1   2  11   11.20    1.76
  -2  -2 -11    3.75    1.33
  -2  -2 -11    4.12    1.23
   2   2  11    2.49    1.13
   2   2  11    6.22    1.50
   8  -3 -11   15.07    1.92
  -8   3  11   11.32    2.20
   7  -3 -11   27.01    2.08
  -7   3  11   22.31    3.04
   6  -3 -11    3.61    0.91
  -6   3  11    3.83    1.50
   5  -3 -11    5.66    1.12
  -5   3  11    1.86    1.22
   4  -3 -11    2.29    0.75
  -4   3  11   -0.21    0.77
   3  -3 -11    3.89    0.98
  -3   3  11    5.01    1.51
   2  -3 -11   33.72    2.42
   2  -3 -11   31.93    2.42
  -2   3  11   36.45    2.97
   1  -3 -11   10.16    1.60
   1  -3 -11    7.54    1.41
  -1   3  11    8.10    1.67
   0  -3 -11    1.26    0.85
   0  -3 -11    1.16    0.85
   0   3  11    0.34    0.67
   0   3  11    0.06    0.68
  -1  -3 -11    0.33    0.59
  -1  -3 -11    0.34    0.79
   1   3  11    0.01    0.73
   8  -4 -11    0.16    0.57
  -8   4  11    0.54    0.92
  -7   4  11   17.09    2.82
  -6   4  11    3.74    1.49
   5  -4 -11    3.38    0.94
  -5   4  11   -0.09    0.90
   4  -4 -11   28.09    2.12
  -4   4  11   17.12    2.89
   3  -4 -11   26.79    2.18
   3  -4 -11   31.00    2.28
  -3   4  11   25.49    2.97
   2  -4 -11    1.96    0.88
   2  -4 -11    0.65    0.64
  -2   4  11    2.43    1.12
   1  -4 -11    1.37    0.75
   1  -4 -11    1.10    0.79
  -1   4  11    0.29    0.72
   0  -4 -11   13.30    1.93
   0  -4 -11   13.65    2.07
  -1  -4 -11    7.87    1.57
  -1  -4 -11    7.20    1.65
   1   4  11    7.59    1.71
  -8   5  11   17.88    2.76
  -7   5  11    6.42    1.88
  -6   5  11    3.46    1.49
   5  -5 -11   23.13    1.97
   4  -5 -11    1.14    0.59
   4  -5 -11    0.41    0.60
  -4   5  11    0.55    1.04
   3  -5 -11    4.77    1.11
   3  -5 -11    4.99    1.15
  -3   5  11    4.57    1.32
   2  -5 -11   21.40    2.40
   2  -5 -11   23.84    2.52
   1  -5 -11   23.40    2.56
   1  -5 -11   26.58    2.79
   0  -5 -11    2.27    1.02
   0  -5 -11    4.48    1.40
  -7   6  11    0.39    1.10
  -6   6  11   47.80    4.26
   5  -6 -11    1.65    0.76
   5  -6 -11    1.59    1.23
  -5   6  11   -0.34    1.02
   4  -6 -11    8.79    1.51
   4  -6 -11    9.39    1.61
   3  -6 -11    1.39    0.78
   3  -6 -11    0.15    0.58
   2  -6 -11   15.63    2.09
   2  -6 -11   23.50    2.61
   1  -6 -11    1.30    1.06
   1  -6 -11    0.52    0.78
   5  -7 -11   12.42    1.92
   4  -7 -11   43.18    3.16
   4  -7 -11   48.82    3.12
   3  -7 -11    2.88    1.15
   3  -7 -11    1.24    0.75
   2   8 -12    6.18    1.44
   1   8 -12    9.13    1.61
   0   8 -12    0.30    0.67
   0  -8  12    0.43    0.80
   3   7 -12   -0.16    0.56
   2   7 -12    0.38    0.69
  -2  -7  12   -0.24    0.80
   1   7 -12    1.32    0.83
  -1  -7  12    0.88    0.84
   0   7 -12    0.56    0.75
   0  -7  12    0.39    0.76
  -1   7 -12    4.63    1.23
   1  -7  12    1.70    1.02
   5   6 -12   10.01    1.67
   4   6 -12    8.69    1.62
  -4  -6  12   11.17    2.19
   3   6 -12   12.50    1.86
  -3  -6  12   14.60    2.42
   2   6 -12    0.29    0.70
  -2  -6  12    0.39    0.93
   1   6 -12    0.44    0.54
  -1  -6  12   -0.70    0.64
   0   6 -12    2.74    0.98
   0  -6  12    1.88    0.98
  -1   6 -12   49.28    3.14
   1  -6  12   43.58    3.68
   2  -6  12    7.41    1.83
   2  -6  12    7.07    1.42
   5   5 -12   16.44    2.19
  -5  -5  12    9.30    2.20
   4   5 -12    0.24    0.50
  -4  -5  12    1.30    1.11
   3   5 -12   22.98    2.57
  -3  -5  12   28.90    2.84
   2   5 -12   37.38    2.74
  -2  -5  12   41.24    3.34
   1   5 -12    0.22    0.56
  -1  -5  12   -0.18    0.80
   0   5 -12   15.92    1.99
   0  -5  12   15.34    2.47
  -1   5 -12   27.05    2.29
   1  -5  12   27.55    2.70
   1  -5  12   30.51    3.00
  -2   5 -12    3.02    1.49
   2  -5  12    2.61    1.37
   2  -5  12    0.65    0.83
   6   4 -12   -0.18    0.54
  -6  -4  12   -0.81    0.84
   5   4 -12    2.05    0.81
  -5  -4  12    0.03    0.93
   4   4 -12   24.93    2.61
  -4  -4  12   26.89    3.44
   3   4 -12    0.89    0.69
  -3  -4  12    2.35    1.24
   2   4 -12    3.82    1.05
  -2  -4  12    3.05    1.25
   1   4 -12   46.95    3.00
  -1  -4  12   45.06    3.57
   0   4 -12   18.21    2.16
   0  -4  12   16.10    2.46
  -1   4 -12    0.28    0.55
   1  -4  12    0.63    0.77
  -2   4 -12    1.90    0.93
   2  -4  12    1.61    1.02
   7   3 -12   -0.08    0.68
   7   3 -12    0.50    0.65
  -7  -3  12    0.48    1.11
   6   3 -12    0.32    0.57
  -6  -3  12    0.43    1.09
   5   3 -12    3.61    1.02
  -5  -3  12    2.36    1.26
   4   3 -12   15.37    1.94
  -4  -3  12   12.92    2.44
   3   3 -12    4.46    1.16
  -3  -3  12    5.47    1.55
   2   3 -12   32.27    2.41
  -2  -3  12   28.67    2.86
   1   3 -12    0.09    0.52
  -1  -3  12    0.86    0.94
   0   3 -12   49.70    3.18
   0  -3  12   52.22    3.85
  -1   3 -12    0.37    0.60
   1  -3  12    0.15    0.69
  -2   3 -12   11.13    1.74
   2  -3  12   12.31    2.22
   7   2 -12    4.11    1.30
   7   2 -12    3.51    1.13
  -7  -2  12    4.02    1.81
   6   2 -12    0.81    0.62
   6   2 -12    0.27    0.67
  -6  -2  12   -1.02    0.90
   5   2 -12   12.72    1.69
   4   2 -12    3.75    1.01
  -4  -2  12    3.02    1.55
   3   2 -12   12.36    1.69
  -3  -2  12   13.09    2.31
   2   2 -12    0.18    0.50
  -2  -2  12    0.71    0.76
   1   2 -12   28.93    2.32
  -1  -2  12   30.63    2.89
   0   2 -12   14.64    1.96
   0  -2  12   14.31    2.26
  -1   2 -12    5.75    1.35
   1  -2  12    5.77    1.50
  -2   2 -12    3.15    1.06
   2  -2  12    2.16    1.10
   7   1 -12   12.32    1.79
   7   1 -12   20.49    2.25
  -7  -1  12   11.40    2.64
   6   1 -12    8.81    1.45
   6   1 -12    9.48    1.63
  -6  -1  12    2.84    1.39
   4   1 -12    1.29    0.60
  -4  -1  12    2.50    1.43
   3   1 -12   49.01    3.04
  -3  -1  12   52.73    3.89
   2   1 -12    8.43    1.41
  -2  -1  12    8.22    1.75
   1   1 -12   16.84    2.08
  -1  -1  12   16.79    2.48
   0   1 -12    6.23    1.27
   0  -1  12    6.84    1.70
  -1   1 -12    4.13    1.12
   1  -1  12    6.25    1.64
  -2   1 -12   27.82    2.82
  -2   1 -12   31.46    2.56
   2  -1  12   24.66    3.14
   2  -1  12   31.96    2.64
   8   0 -12   37.92    2.84
  -8   0  12   30.37    3.89
   7   0 -12    1.73    0.78
   7   0 -12    0.87    0.68
  -7   0  12    0.91    1.16
   6   0 -12    0.12    0.56
   6   0 -12   -0.09    0.48
  -6   0  12    0.43    1.00
   5   0 -12    5.20    1.12
   5   0 -12    5.12    1.11
  -5   0  12    0.50    0.99
   4   0 -12   -0.18    0.41
  -4   0  12   -0.16    0.88
   3   0 -12   24.66    2.11
  -3   0  12   27.79    3.35
   2   0 -12    3.28    0.93
  -2   0  12    4.62    1.42
   1   0 -12   68.30    3.85
  -1   0  12   73.23    4.57
   0   0 -12   18.67    2.20
   0   0  12   25.45    3.02
  -1   0 -12    4.77    1.23
  -1   0 -12    3.96    1.11
   1   0  12    5.25    1.26
   1   0  12    4.02    1.34
  -2   0 -12   -0.14    0.58
  -2   0 -12    1.31    0.98
   2   0  12   -0.03    0.76
   2   0  12    0.33    0.69
   8  -1 -12   20.82    2.34
  -8   1  12   15.53    2.92
   7  -1 -12    2.65    1.10
   7  -1 -12    1.73    0.83
  -7   1  12    1.40    1.24
   6  -1 -12   16.33    1.94
   6  -1 -12   20.34    2.02
   5  -1 -12    0.05    0.59
   5  -1 -12    0.83    0.61
  -5   1  12   -0.30    0.80
   4  -1 -12    2.82    0.88
  -4   1  12    3.40    1.48
   3  -1 -12    0.51    0.57
  -3   1  12    1.21    1.16
   2  -1 -12   15.71    1.98
  -2   1  12   19.87    2.69
   1  -1 -12   82.78    4.36
  -1   1  12   84.11    5.00
   0  -1 -12   33.68    2.65
   0  -1 -12   33.35    2.74
   0   1  12   32.96    3.51
   0   1  12   38.70    3.26
  -1  -1 -12    1.23    0.75
  -1  -1 -12    1.84    1.04
   1   1  12   -0.29    0.67
   1   1  12    0.88    0.86
   8  -2 -12   13.00    1.85
  -8   2  12    9.65    2.27
   7  -2 -12   13.28    1.80
  -7   2  12   11.99    2.61
   6  -2 -12    2.93    0.91
  -6   2  12    1.23    1.12
   5  -2 -12    0.57    0.54
  -5   2  12   -0.07    0.85
   4  -2 -12   26.23    2.14
  -4   2  12   23.54    3.33
   3  -2 -12   40.55    2.79
  -3   2  12   41.54    3.45
   2  -2 -12    4.19    1.11
  -2   2  12    3.20    1.29
   1  -2 -12    7.04    1.36
  -1   2  12    9.11    1.89
   0  -2 -12   20.43    2.38
   0  -2 -12   16.33    2.19
   0   2  12   13.77    2.19
   0   2  12   15.32    2.00
  -1  -2 -12    2.12    1.16
  -1  -2 -12    1.63    0.99
   1   2  12    1.40    0.97
   1   2  12    1.58    1.00
   8  -3 -12   13.38    1.79
  -8   3  12    8.05    2.10
  -7   3  12    2.53    1.53
   6  -3 -12    2.31    0.81
  -6   3  12    0.97    1.12
   5  -3 -12   31.44    2.37
   4  -3 -12   27.91    2.23
  -4   3  12   23.19    3.36
   3  -3 -12    3.72    1.02
  -3   3  12    3.68    1.35
   2  -3 -12    6.22    1.28
  -2   3  12    8.09    1.72
   1  -3 -12    3.33    1.08
   1  -3 -12    3.56    1.03
  -1   3  12    1.39    0.98
   0  -3 -12    0.67    0.68
   0  -3 -12   -0.25    0.69
   0   3  12   -0.48    0.60
  -7   4  12    1.79    1.50
  -6   4  12   11.56    2.58
   5  -4 -12    3.08    0.90
  -5   4  12    0.72    1.21
   4  -4 -12   16.29    2.09
  -4   4  12   11.09    2.41
   3  -4 -12    7.31    1.45
  -3   4  12    5.12    1.56
   2  -4 -12   22.24    2.37
   2  -4 -12   20.53    2.49
  -2   4  12   21.94    2.78
   1  -4 -12    0.42    0.84
   1  -4 -12    0.64    0.74
  -7   5  12    0.45    1.13
  -6   5  12    0.59    1.02
   5  -5 -12   18.93    2.16
  -5   5  12    7.63    2.25
   4  -5 -12    3.39    0.98
  -4   5  12    4.44    1.64
   3  -5 -12   -0.23    0.53
   3  -5 -12    1.35    0.84
   2  -5 -12   13.63    2.00
   2  -5 -12   15.72    2.11
  -6   6  12    1.38    1.41
   5  -6 -12   20.06    2.44
   4  -6 -12    8.00    1.58
   4  -6 -12    3.59    1.09
   3  -6 -12    4.57    1.19
   3  -6 -12    5.21    1.35
   3   6 -13   25.04    2.75
  -3  -6  13   27.94    3.42
   2   6 -13    9.42    1.77
  -2  -6  13   12.46    2.29
   1   6 -13    0.67    0.76
  -1  -6  13    1.40    1.05
   0   6 -13   12.76    1.96
   0  -6  13   11.31    2.16
   4   5 -13    4.48    1.17
  -4  -5  13    3.67    1.45
   3   5 -13   23.39    2.64
  -3  -5  13   19.87    2.79
   2   5 -13   49.80    3.33
  -2  -5  13   48.42    3.87
   1   5 -13    1.45    0.85
  -1  -5  13    1.57    1.09
   0   5 -13    1.38    0.79
   0  -5  13    0.57    0.92
   5   4 -13   19.14    2.31
  -5  -4  13   19.01    3.30
   4   4 -13    5.18    1.28
  -4  -4  13    5.47    1.82
   3   4 -13  104.46    5.12
  -3  -4  13   92.98    5.69
   2   4 -13   -0.36    0.59
  -2  -4  13   -0.12    0.85
   1   4 -13   -0.18    0.62
  -1  -4  13   -0.82    0.70
   0   4 -13    0.95    0.84
   0  -4  13   -0.17    0.70
  -1   4 -13    4.93    1.24
   1  -4  13    3.23    1.26
   6   3 -13   28.94    3.01
  -5  -3  13   11.77    2.48
   4   3 -13   11.55    1.77
  -4  -3  13   11.60    2.39
   3   3 -13    5.62    1.21
  -3  -3  13    5.91    1.76
   2   3 -13    5.50    1.26
  -2  -3  13    6.21    1.76
   1   3 -13   20.88    2.43
  -1  -3  13   18.47    2.82
   0   3 -13   14.28    1.98
   0  -3  13   11.84    2.22
  -1   3 -13   -0.27    0.61
   1  -3  13    0.00    0.69
   6   2 -13   26.30    2.71
  -6  -2  13    6.77    2.03
   5   2 -13    5.26    1.24
  -5  -2  13    4.92    1.85
   4   2 -13    7.43    1.45
  -4  -2  13    4.88    1.66
   3   2 -13    3.05    0.92
  -3  -2  13    1.08    1.10
   2   2 -13    2.61    0.93
  -2  -2  13    1.31    1.08
   1   2 -13   48.66    3.28
  -1  -2  13   53.63    4.07
   0   2 -13   27.16    2.77
   0  -2  13   20.97    3.00
  -1   2 -13    4.62    1.23
   1  -2  13    5.76    1.66
   7   1 -13    0.89    0.71
   7   1 -13   -0.77    0.60
  -7  -1  13    0.09    1.08
   6   1 -13    5.65    1.27
  -6  -1  13    2.39    1.49
   5   1 -13   20.64    2.37
  -5  -1  13   11.39    2.69
   4   1 -13    5.38    1.17
  -4  -1  13    4.32    1.62
   3   1 -13   10.99    1.63
  -3  -1  13   11.79    2.19
   2   1 -13    6.46    1.38
  -2  -1  13    7.27    1.77
   1   1 -13    4.17    1.16
  -1  -1  13    4.83    1.53
   0   1 -13    4.73    1.23
   0  -1  13    4.26    1.45
  -1   1 -13    1.47    0.87
   1  -1  13    1.71    0.94
   7   0 -13    0.07    0.67
   7   0 -13    0.06    0.61
  -7   0  13   -0.34    0.99
   6   0 -13   -0.04    0.64
   6   0 -13    0.37    0.58
  -6   0  13    0.16    1.26
   5   0 -13    6.66    1.37
  -5   0  13    2.82    1.64
   4   0 -13   19.29    2.28
  -4   0  13   21.34    3.09
   3   0 -13    9.64    1.64
  -3   0  13   11.53    2.24
   2   0 -13   13.40    1.92
  -2   0  13   13.87    2.34
  -1   0  13    3.71    1.39
   0   0 -13   -0.44    0.60
   0   0  13    1.16    1.00
   7  -1 -13    1.11    0.71
   7  -1 -13    1.01    0.75
  -7   1  13    1.43    1.36
   6  -1 -13   10.14    1.67
  -6   1  13    1.02    1.16
   5  -1 -13   37.58    2.64
  -5   1  13   19.87    3.51
   4  -1 -13   30.45    2.50
  -4   1  13   33.36    3.98
   3  -1 -13    0.54    0.57
  -3   1  13   -0.03    0.90
   2  -1 -13    0.16    0.60
  -2   1  13    1.96    1.20
   1  -1 -13   23.21    2.57
  -1   1  13   26.02    3.25
   0  -1 -13    1.61    0.86
   0   1  13    1.81    1.13
  -7   2  13   25.68    3.90
   6  -2 -13   36.95    2.55
  -6   2  13   11.05    2.66
   5  -2 -13   -0.18    0.49
  -5   2  13    0.65    1.16
   4  -2 -13    3.11    0.97
  -4   2  13    3.15    1.55
   3  -2 -13   11.31    1.72
  -3   2  13   15.71    2.64
   2  -2 -13    5.44    1.35
  -2   2  13    4.24    1.53
   1  -2 -13    0.01    0.62
  -1   2  13   -0.16    0.79
   6  -3 -13   19.22    2.18
   5  -3 -13   12.76    1.82
  -5   3  13    7.55    2.13
   4  -3 -13    2.60    0.97
  -4   3  13    2.96    1.50
   3  -3 -13    1.69    0.90
  -3   3  13    2.37    1.30
   2  -3 -13   12.30    1.95
  -2   3  13   11.98    2.20
  -6   4  13    0.45    1.31
   5  -4 -13   -0.39    0.54
  -5   4  13    0.44    1.17
   4  -4 -13    0.45    0.63
  -4   4  13    0.85    1.18
   3  -4 -13    1.12    0.81
  -3   4  13    2.58    1.26
   3   4 -14    6.55    1.54
  -3  -4  14    6.58    1.89
   2   4 -14    0.11    0.64
  -2  -4  14   -0.45    0.76
   4   3 -14    0.09    0.70
  -4  -3  14    0.18    1.10
   3   3 -14    2.49    0.99
  -3  -3  14    4.56    1.54
   2   3 -14    1.41    0.84
  -2  -3  14    2.71    1.29
   1   3 -14   11.34    1.86
  -1  -3  14    8.40    2.13
   5   2 -14    6.99    1.47
  -5  -2  14    5.54    1.96
   4   2 -14   14.29    2.06
  -4  -2  14   16.85    2.79
   3   2 -14    3.67    1.15
  -3  -2  14    3.82    1.48
   2   2 -14   -0.70    0.57
  -2  -2  14    0.83    1.01
   1   2 -14    0.80    0.75
  -1  -2  14    1.87    1.23
   5   1 -14    7.15    1.47
  -5  -1  14    9.27    2.46
   4   1 -14    7.65    1.49
  -4  -1  14    6.37    1.89
   3   1 -14    4.79    1.32
  -3  -1  14    5.58    1.72
   2   1 -14    1.11    0.83
  -2  -1  14    1.40    1.09
   1   1 -14    5.36    1.34
  -1  -1  14    5.12    1.63
   5   0 -14    0.17    0.66
  -5   0  14    0.52    1.27
   4   0 -14   17.06    2.31
  -4   0  14   17.28    2.79
   3   0 -14    6.75    1.45
  -3   0  14    9.79    2.18
   2   0 -14   12.61    1.97
  -2   0  14   11.57    2.35
   5  -1 -14   14.85    2.07
  -5   1  14   11.91    2.71
   4  -1 -14    1.58    0.85
  -4   1  14    0.28    1.13
   3  -1 -14    1.99    0.85
  -3   1  14    1.81    1.20
   2  -1 -14    6.13    1.45
  -2   1  14    7.08    1.93
   5  -2 -14    9.50    1.61
  -5   2  14    6.30    2.12
   4  -2 -14   13.21    2.09
  -4   2  14   12.47    2.55
   3  -2 -14    6.11    1.48
  -3   2  14    5.50    1.74
   0   0   0    0.00    0.00
;
_shelx_hkl_checksum   33587
